# Supplementary material for: Identification of Novel Gymnodimines and Spirolides from the Marine Dinoflagellate Alexandrium ostenfeldii
Source: PubMed Central journal article supplement (PMC6266918; doi:10.3390/md16110446), 2018-11-14
Supplement: marinedrugs-16-00446-s001.pdf [file marinedrugs-16-00446-s001.pdf]

# Identification of novel gymnodimines and spirolides from the marine dinoflagellate *Alexandrium ostenfeldii*

## Supporting Information

Christian Zurhelle, Joyce Nieva, Urban Tillmann, Tilmann Harder, Bernd Krock\*, Jan Tebben\*

All raw NMR data (Topspin) and annotated Mestre files are available in the data repository PANGAEA  
<https://doi.pangaea.de/10.1594/PANGAEA.895116>

|                                                                                               |    |
|-----------------------------------------------------------------------------------------------|----|
| Figure S1: Structures of known and novel gymnodimines.                                        | 3  |
| Figure S2: Structures of known and novel spirolides.                                          | 4  |
| Figure S3: 1D Proton spectra of <b>1</b> (600 MHz, pyridine-d <sub>5</sub> ).                 | 5  |
| Figure S4: 1D <sup>13</sup> C-spectra of <b>1</b> .                                           | 6  |
| Figure S5: Multiplicity-edited 2D HSQC spectra of <b>1</b> .                                  | 7  |
| Figure S6: Slice 1 of multiplicity-edited 2D HSQC spectra of <b>1</b> .                       | 8  |
| Figure S7: Slice 2 of multiplicity-edited 2D HSQC spectra of <b>1</b> .                       | 9  |
| Figure S8: 2D COSY spectra of <b>1</b> .                                                      | 10 |
| Figure S9: Slice 1 of 2D COSY spectra of <b>1</b> .                                           | 11 |
| Figure S10: Slice 2 of 2D COSY spectra of <b>1</b> .                                          | 12 |
| Figure S11: 2D double quantum filtered COSY spectra of <b>1</b> .                             | 13 |
| Figure S12: 2D TOCSY spectra of <b>1</b> .                                                    | 14 |
| Figure S13: Slice 1 of 2D TOCSY spectra of <b>1</b> .                                         | 15 |
| Figure S14: Slice 2 of 2D TOCSY spectra of <b>1</b> .                                         | 16 |
| Figure S15: HSQC-TOCSY spectra of <b>1</b> .                                                  | 17 |
| Figure S16: Slice 1 of HSQC-TOCSY spectra of <b>1</b> .                                       | 18 |
| Figure S17: Slice 2 of HSQC-TOCSY spectra of <b>1</b> .                                       | 19 |
| Figure S18: Slice 3 of HSQC-TOCSY spectra of <b>1</b> .                                       | 20 |
| Figure S19: 2D IMPACT-HMBC spectra of <b>1</b> .                                              | 21 |
| Figure S20: Slice 1 of 2D IMPACT-HMBC spectra of <b>1</b> .                                   | 22 |
| Figure S21: Slice 2 of 2D IMPACT-HMBC spectra of <b>1</b> .                                   | 23 |
| Figure S22: ROESY spectra of <b>1</b> .                                                       | 24 |
| Figure S23: Measured CD-spectra of <b>1</b> and <b>4</b> and simulated CD-spectra of <b>1</b> | 25 |
| Figure S24: 1D Proton spectra of <b>2</b> .                                                   | 26 |
| Figure S25: Multiplicity-edited 2D HSQC spectra of <b>2</b> .                                 | 27 |
| Figure S26: Slice 1 of Multiplicity-edited 2D HSQC spectra of <b>2</b> .                      | 28 |
| Figure S27: Slice 2 of Multiplicity-edited 2D HSQC spectra of <b>2</b> .                      | 29 |
| Figure S28: 2D COSY spectra of <b>2</b> .                                                     | 30 |
| Figure S29: Slice of COSY spectra of <b>2</b> .                                               | 31 |
| Figure S30: 2D HSQC-TOCSY spectra of <b>2</b> .                                               | 32 |
| Figure S31: Slice of 2D HSQC-TOCSY spectra of <b>2</b> .                                      | 33 |
| Figure S32: 1D Proton spectra of <b>10</b> .                                                  | 34 |
| Figure S33: 1D <sup>13</sup> C-spectra of <b>10</b> .                                         | 35 |
| Figure S34: Slice of 1D <sup>13</sup> C-spectra of <b>10</b> .                                | 36 |

|                                                                          |    |
|--------------------------------------------------------------------------|----|
| Figure S35: 2D HSQC spectra of <b>10</b> .                               | 37 |
| Figure S36: COSY spectra of <b>10</b> .                                  | 38 |
| Figure S37: 2D TOCSY spectra of <b>10</b> .                              | 39 |
| Figure S38: Slice of 2D TOCSY spectra of <b>10</b> .                     | 40 |
| Figure S39: HSQC-TOCSY spectra of <b>10</b> .                            | 41 |
| Figure S40: Slice of HSQC-TOCSY spectra of <b>10</b> .                   | 42 |
| Figure S41: HMBC spectra of <b>10</b> .                                  | 43 |
| Figure S42: 1D Proton spectra of <b>10</b> .                             | 44 |
| Figure S43: 2D HSQC spectra of <b>10</b> .                               | 45 |
| Figure S44: Slice 1 of 2D HSQC spectra of <b>10</b> .                    | 46 |
| Figure S45: Slice 2 of 2D HSQC spectra of <b>10</b> .                    | 47 |
| Figure S46: 2D COSY spectra of <b>10</b> .                               | 48 |
| Figure S47: Slice of 2D COSY spectra of <b>10</b> .                      | 49 |
| Figure S48: 2D TOCSY spectra of <b>10</b> .                              | 50 |
| Figure S49: Slice of 2D TOCSY spectra of <b>10</b> .                     | 51 |
| Figure S50: 2D HSQC-TOCSY spectra of <b>10</b> .                         | 52 |
| Figure S51: Slice of 2D HSQC-TOCSY spectra of <b>10</b> .                | 53 |
| Figure S52: 2D HMBC spectra of <b>10</b> .                               | 54 |
| Figure S53: Slice of 2D HMBC spectra of <b>10</b> .                      | 55 |
| Figure S54: 1D Proton spectra of <b>11</b> .                             | 56 |
| Figure S55: 2D HSQC spectra of <b>11</b> .                               | 57 |
| Figure S56: Slice of 2D HSQC spectra of <b>11</b> .                      | 58 |
| Figure S57: 2D COSY spectra of <b>11</b> .                               | 59 |
| Figure S58: Slice of 2D COSY spectra of <b>11</b> .                      | 60 |
| Figure S59: 2D TOCSY spectra of <b>11</b> .                              | 61 |
| Figure S60: Slice of 2D TOCSY spectra of <b>11</b> .                     | 62 |
| Figure S61: 2D HMBC spectra of <b>11</b> .                               | 63 |
| Figure S62: Slice of 2D HMBC spectra of <b>11</b> .                      | 64 |
| Table S1: Mass transitions of spiroimines included in LC-MS/MS analysis. | 65 |
| Figure S63: LC-MS/MS chromatogram of station SL92-2.                     | 66 |

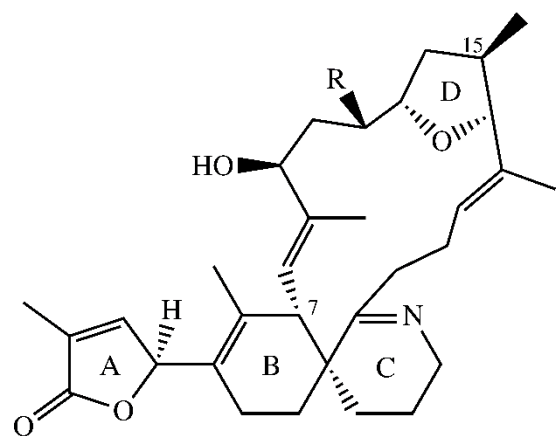

**4** GYM A: R=H  
**7** 12-methylGYM A: R=CH<sub>3</sub>

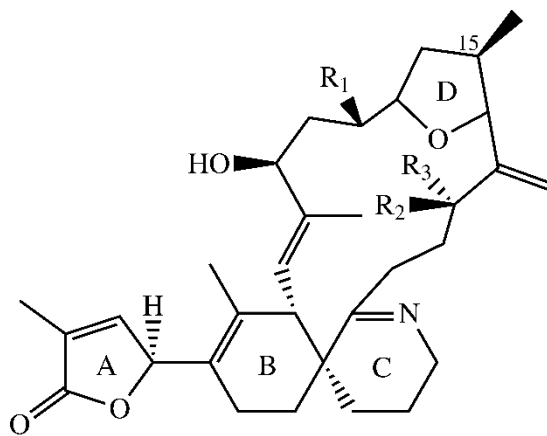

**5** GYM B: R<sub>1</sub>=H, R<sub>2</sub>=H, R<sub>3</sub>=OH  
**8** 12-MethylGYM B: R<sub>1</sub>=CH<sub>3</sub>, R<sub>2</sub>=H, R<sub>3</sub>=OH  
**6** GYM C: R<sub>1</sub>=H, R<sub>2</sub>=OH, R<sub>3</sub>=H

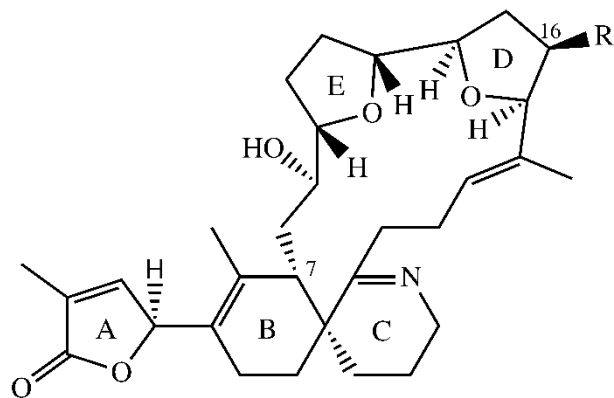

**3** GYM D: R=CH<sub>3</sub>  
**1** 16-desmethylGYM D: R=H

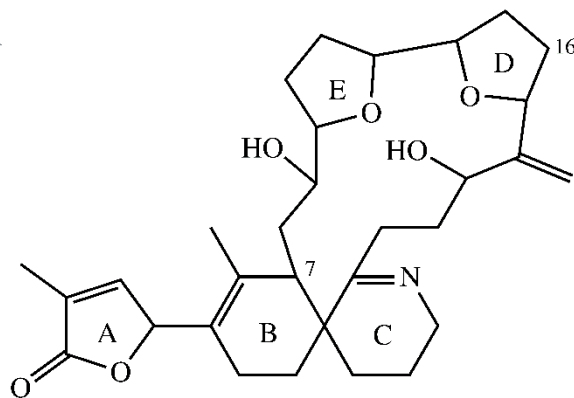

**2** GYM E

**Figure S1: Structures of known and novel gymnodimines.**

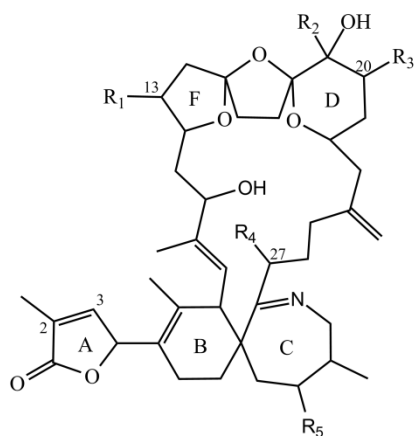

- SPX A  $\Delta^{2,3}$  R<sub>1,2</sub> = CH<sub>3</sub>, R<sub>3,4,5</sub> = H  
 SPX B R<sub>1,2</sub> = CH<sub>3</sub>, R<sub>3,4,5</sub> = H  
 SPX C  $\Delta^{2,3}$  R<sub>1,2,5</sub> = CH<sub>3</sub>, R<sub>3,4</sub> = H  
 SPX D R<sub>1,2</sub> = CH<sub>3</sub>, R<sub>3,4,5</sub> = H  
 13-desMe SPX C (9)  $\Delta^{2,3}$  R<sub>2,5</sub> = CH<sub>3</sub>, R<sub>1,3,4</sub> = H  
 27-OH-13-desMe SPX C  $\Delta^{2,3}$  R<sub>2,5</sub> = CH<sub>3</sub>, R<sub>1,3</sub> = H, R<sub>4</sub> = OH  
 13,19-didesMe SPX C  $\Delta^{2,3}$  R<sub>5</sub> = CH<sub>3</sub>, R<sub>1,2,3,4</sub> = H  
 27-OH-13,19-didesMe SPX C  $\Delta^{2,3}$  R<sub>5</sub> = CH<sub>3</sub>, R<sub>1,2,3</sub> = H, R<sub>4</sub> = OH  
 27-Oxo-13,19-didesMe SPX C  $\Delta^{2,3}$  R<sub>5</sub> = CH<sub>3</sub>, R<sub>1,2,3</sub> = H, R<sub>4</sub> = O=  
 20-OH-13,19-didesMe SPX C (10)  $\Delta^{2,3}$  R<sub>5</sub> = CH<sub>3</sub>, R<sub>1,2,4</sub> = H, R<sub>3</sub> = OH  
 20-OH-13,19-didesMe SPX D (11) R<sub>5</sub> = CH<sub>3</sub>, R<sub>1,2,4</sub> = H, R<sub>3</sub> = OH

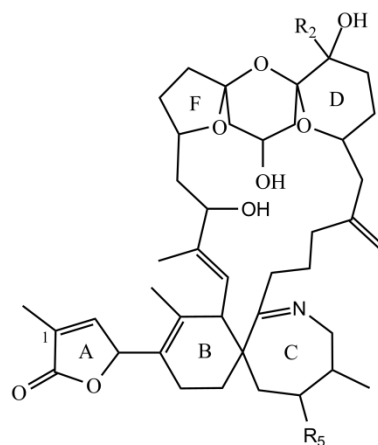

- SPX G  $\Delta^{2,3}$  R<sub>5</sub> = CH<sub>3</sub>, R<sub>2</sub> = H  
 20-Me SPX G  $\Delta^{2,3}$  R<sub>2,5</sub> = CH<sub>3</sub>

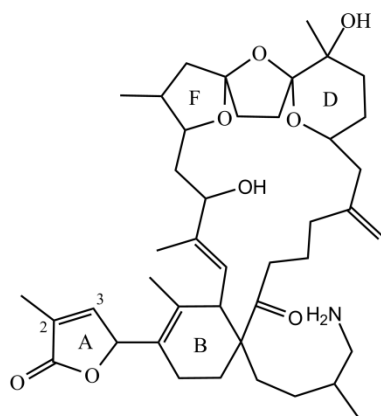

- SPX E  $\Delta^{2,3}$   
 SPX F

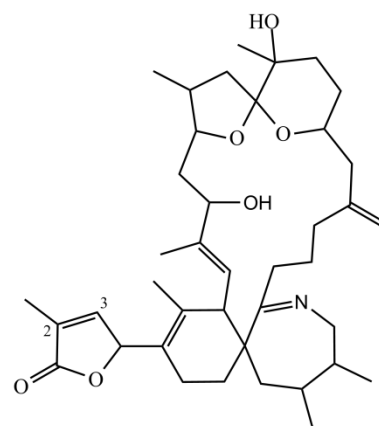

- SPX H  $\Delta^{2,3}$   
 SPX I

**Figure S2: Structures of known and novel spirocyclics.**

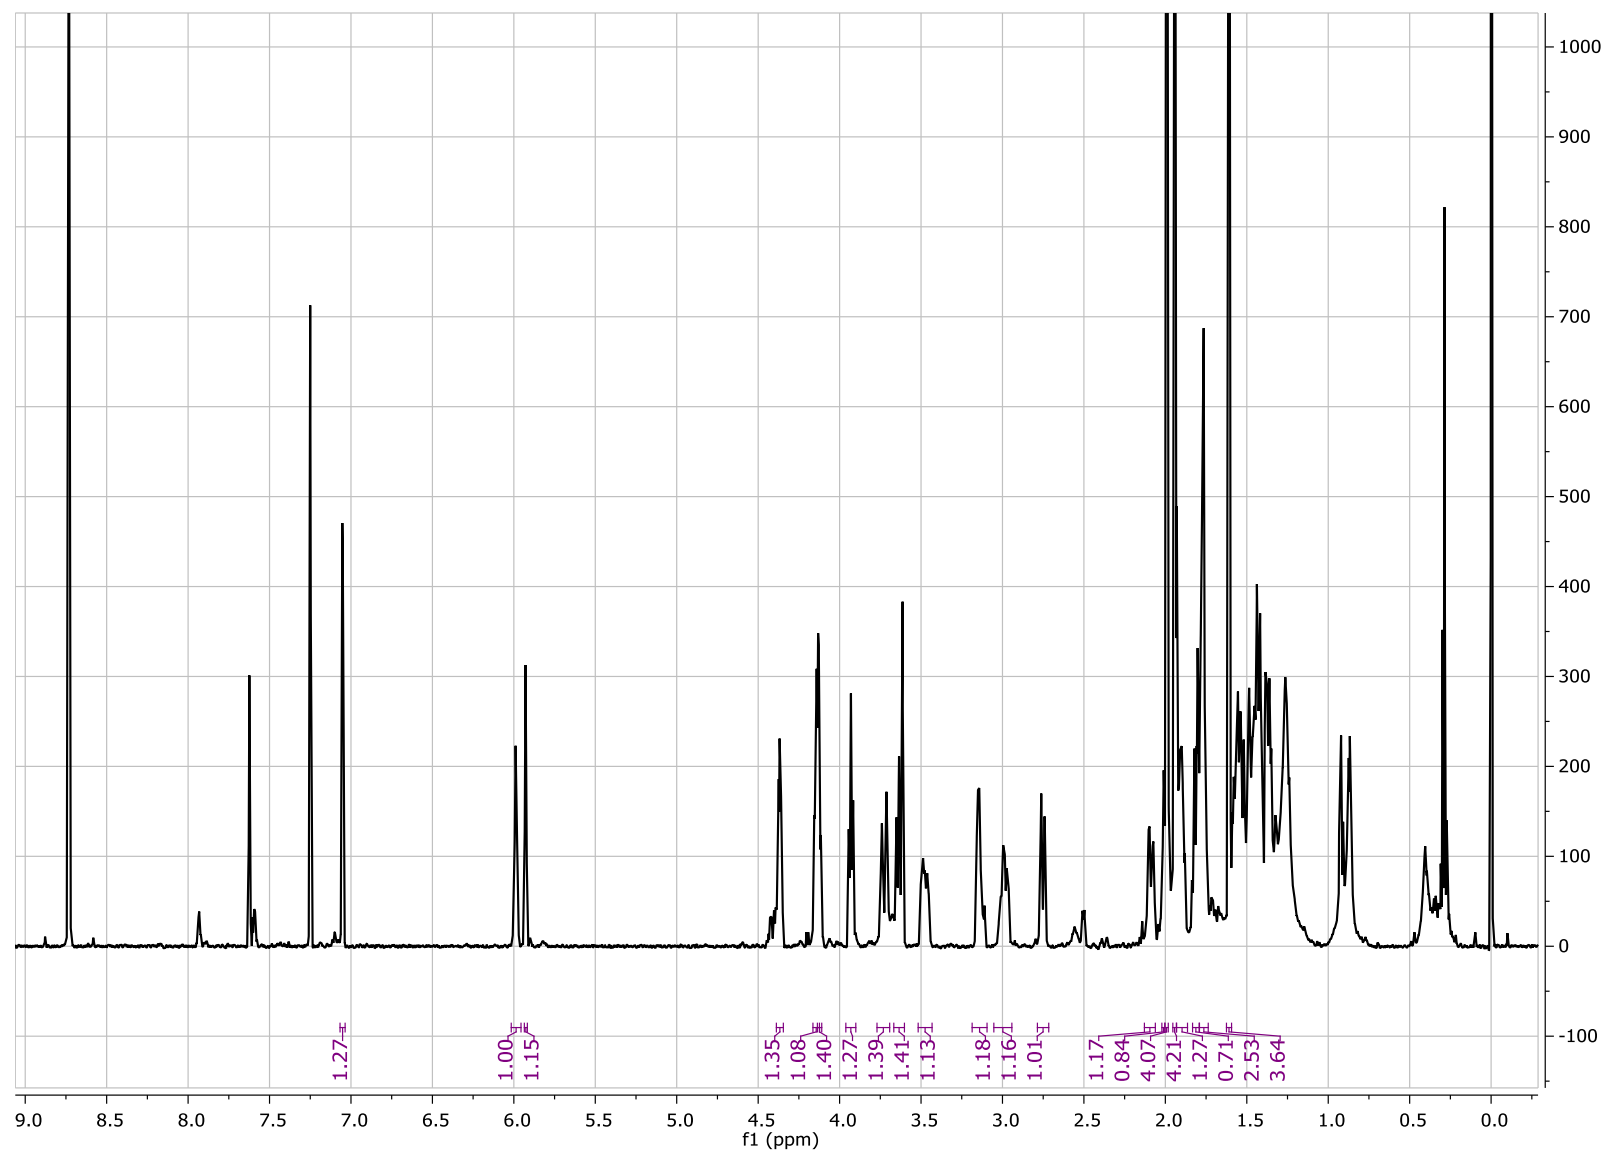

Figure S3: 1D Proton spectra of 16-Desmethylgymnodimine D (600 MHz, pyridine-d<sub>5</sub>).

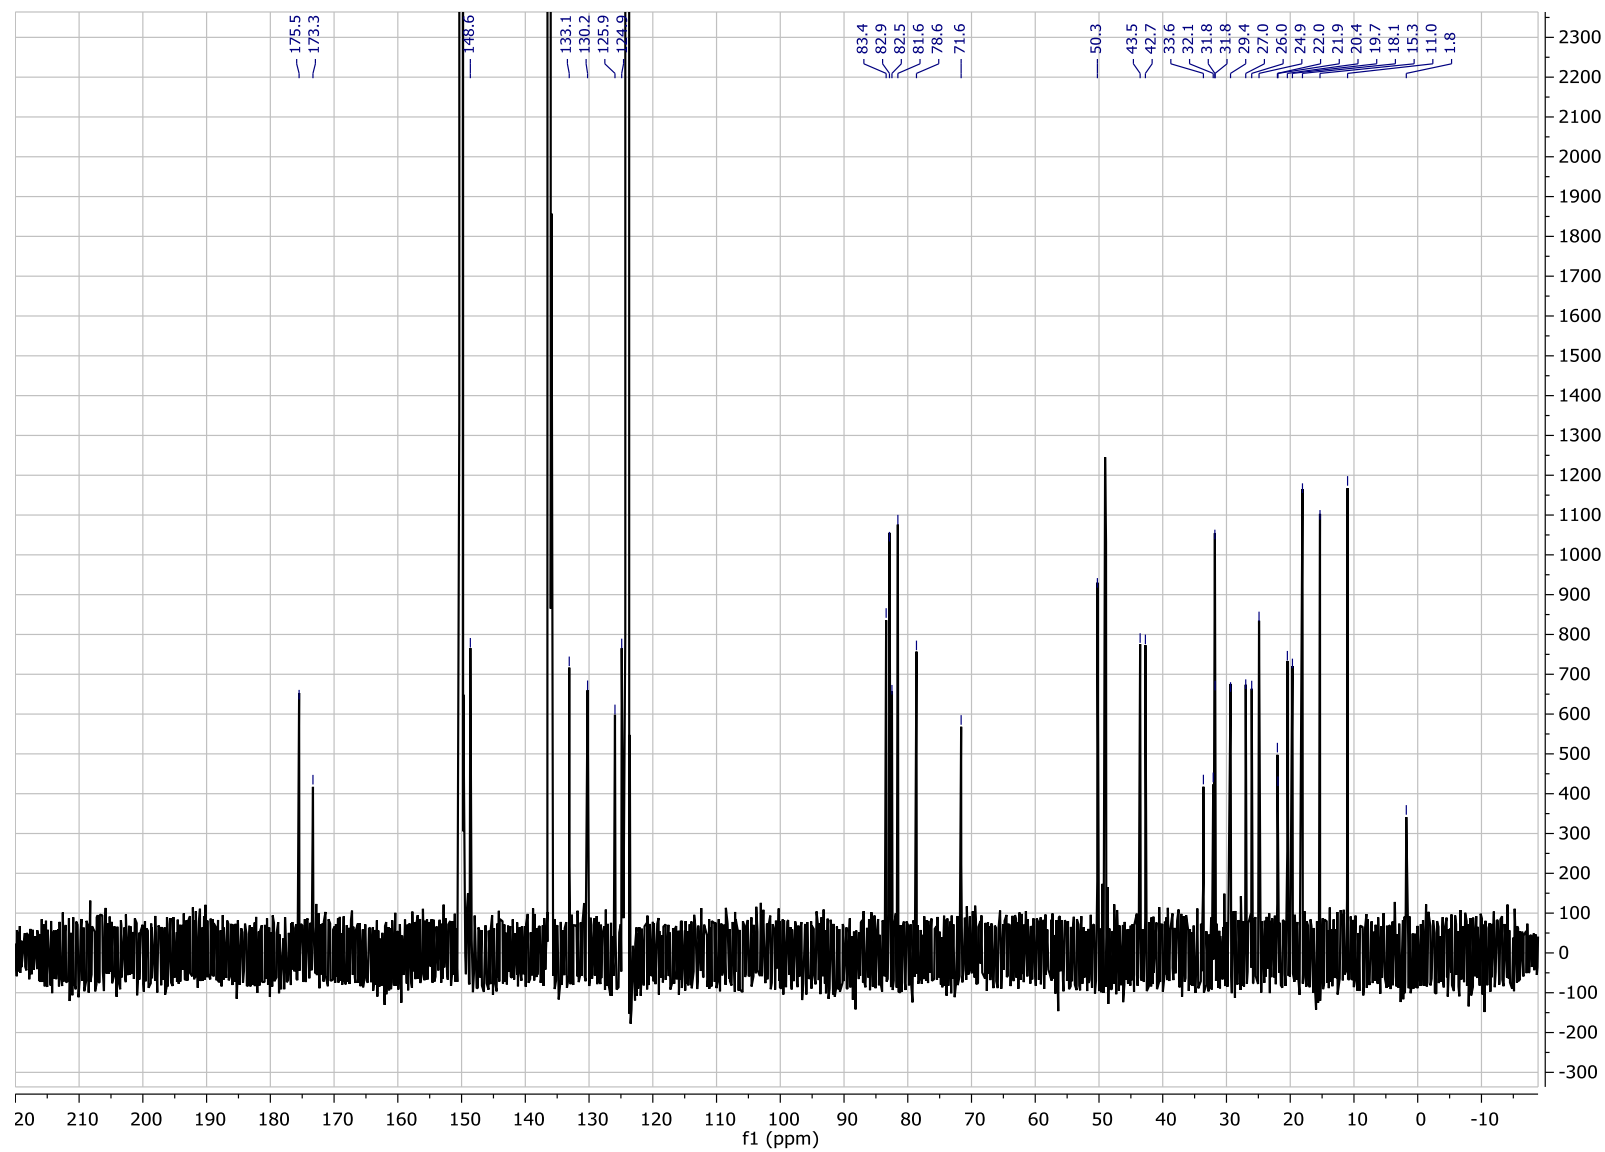

Figure S4: 1D  $^{13}\text{C}$ -spectra of 16-Desmethylgymnodimine D (150 MHz, pyridine- $d_5$ ).

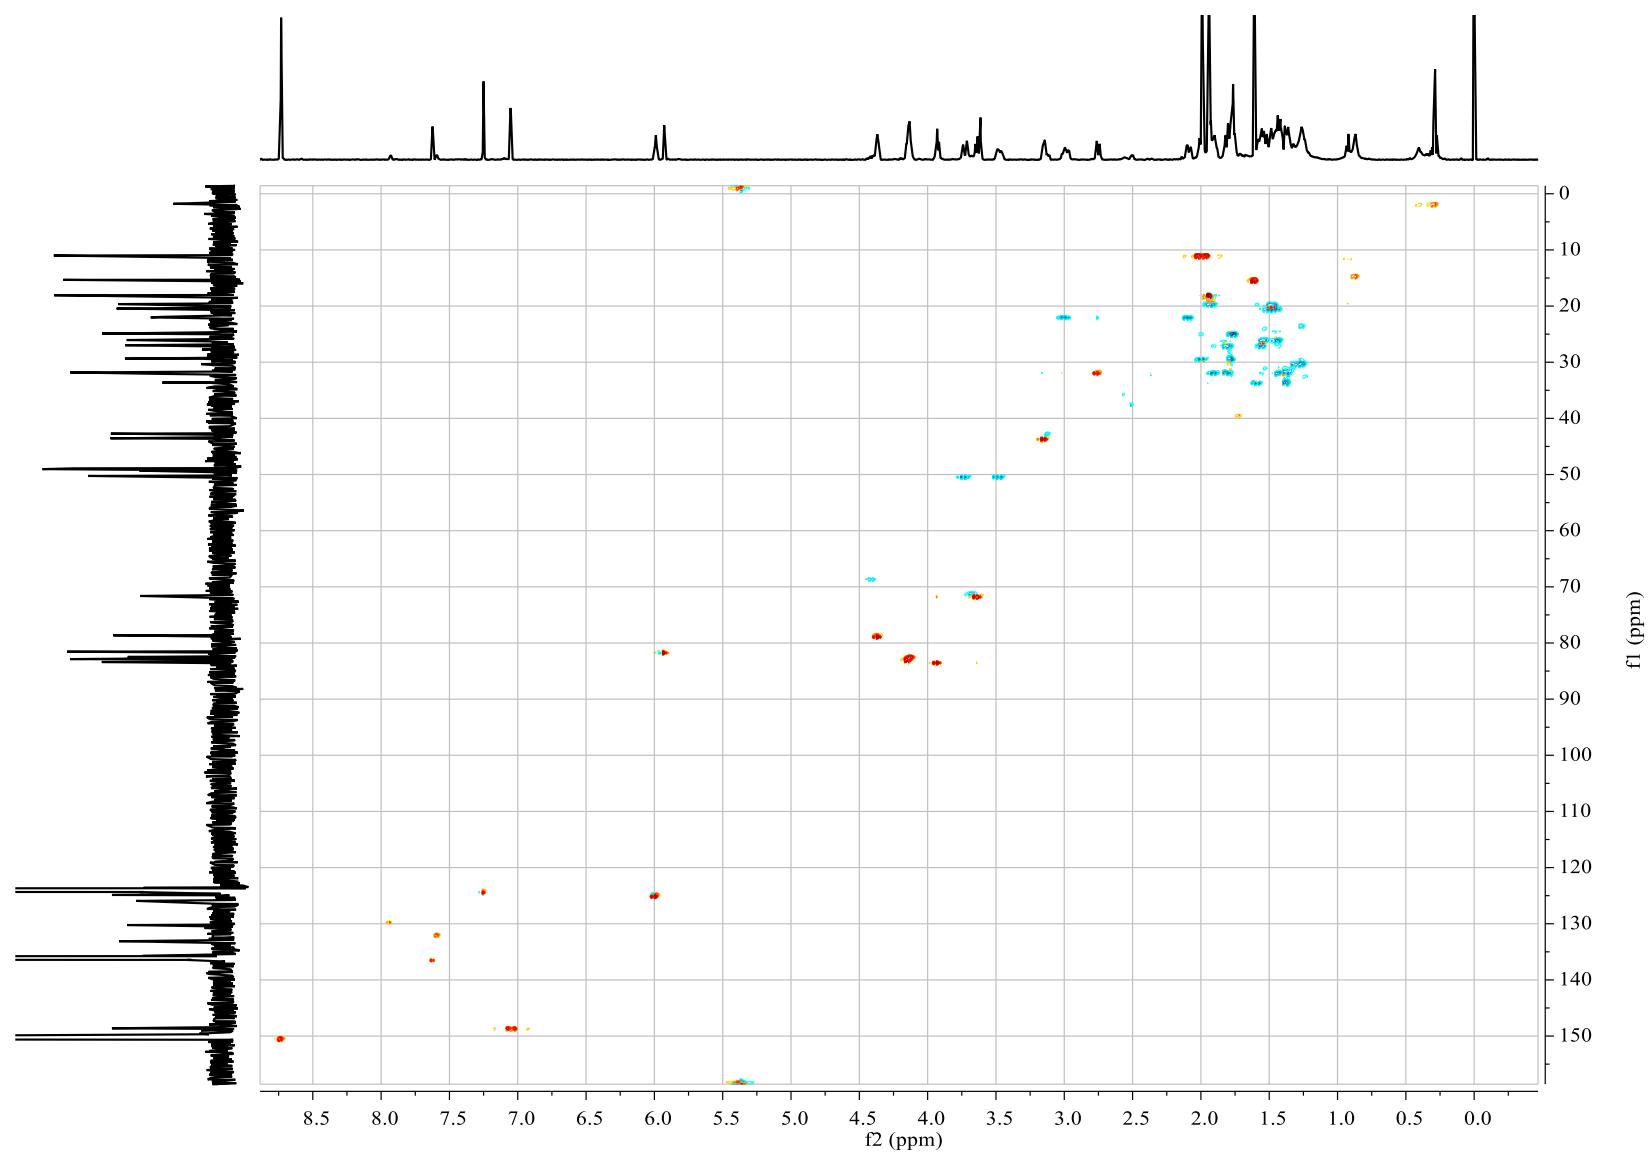

Figure S5: Multiplicity-edited 2D HSQC spectra of 16-Desmethylgymnodimine D (600 MHz Proton frequency, pyridine-d<sub>5</sub>).

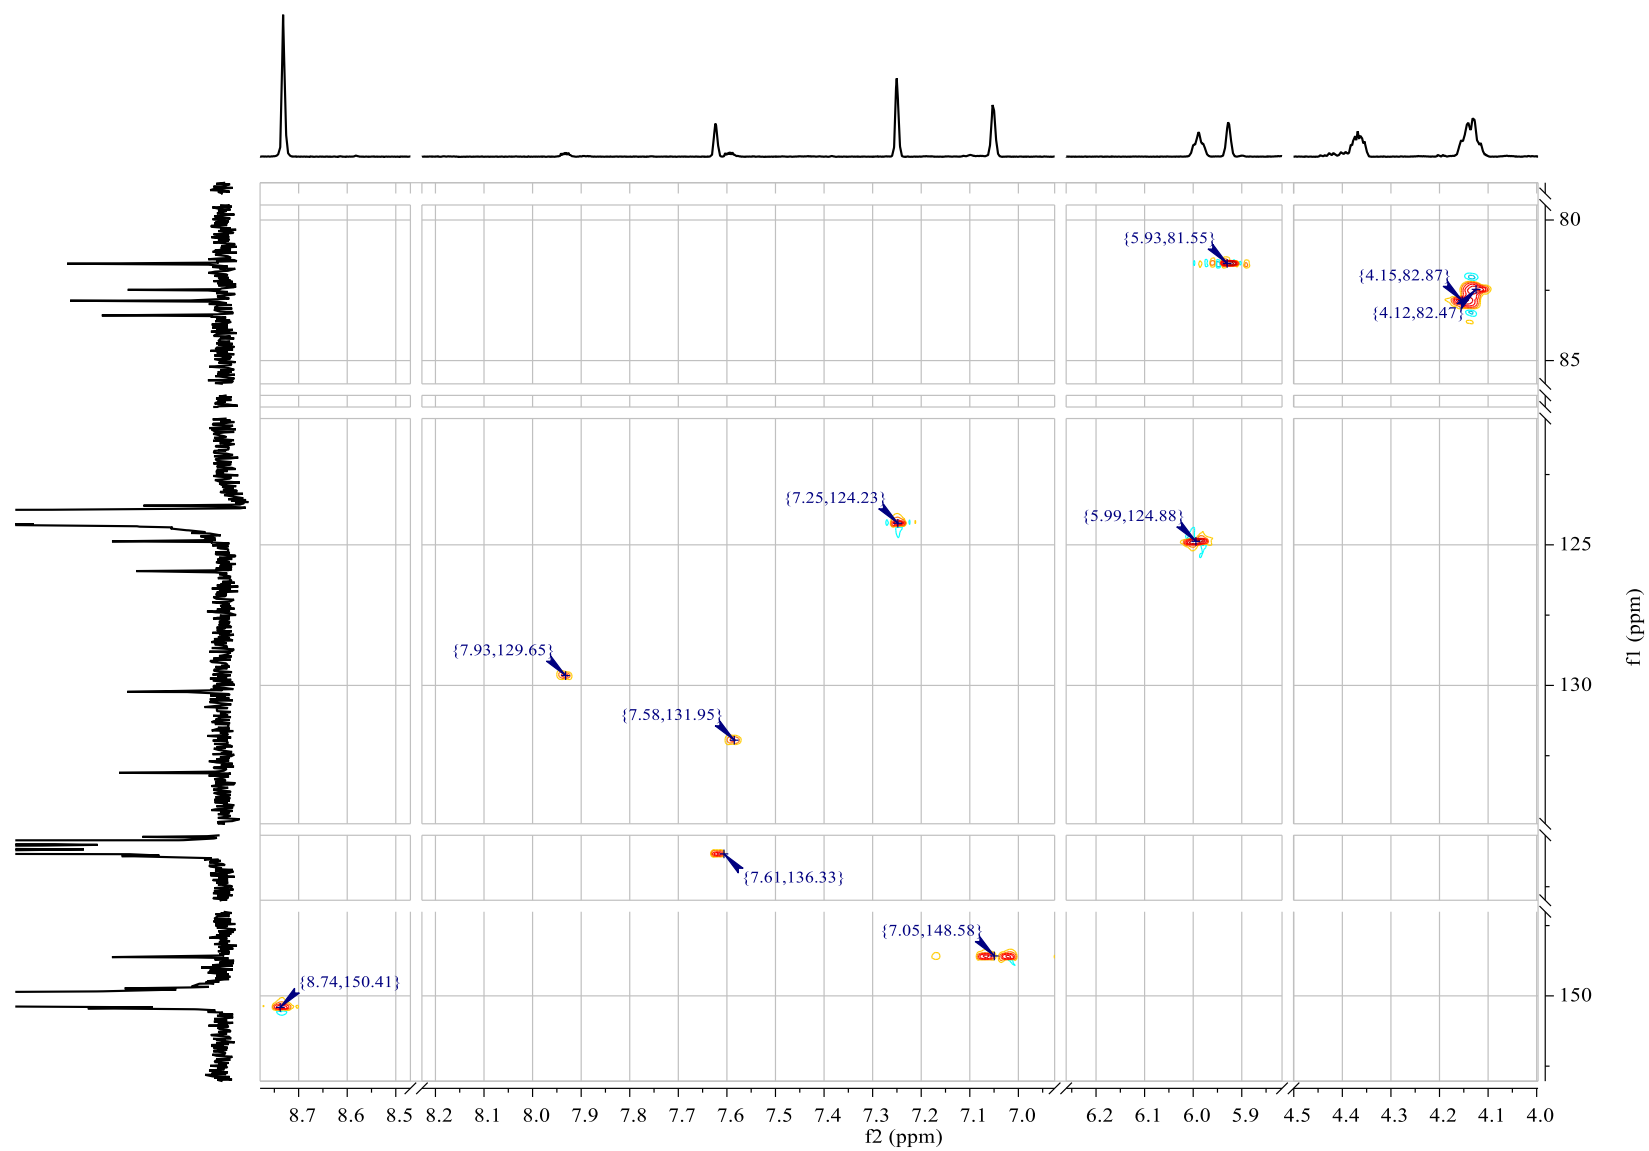

Figure S6: Slice 1 of multiplicity-edited 2D HSQC spectra of 16-Desmethylgymnodimine D (600 MHz Proton frequency, pyridine-d<sub>5</sub>).



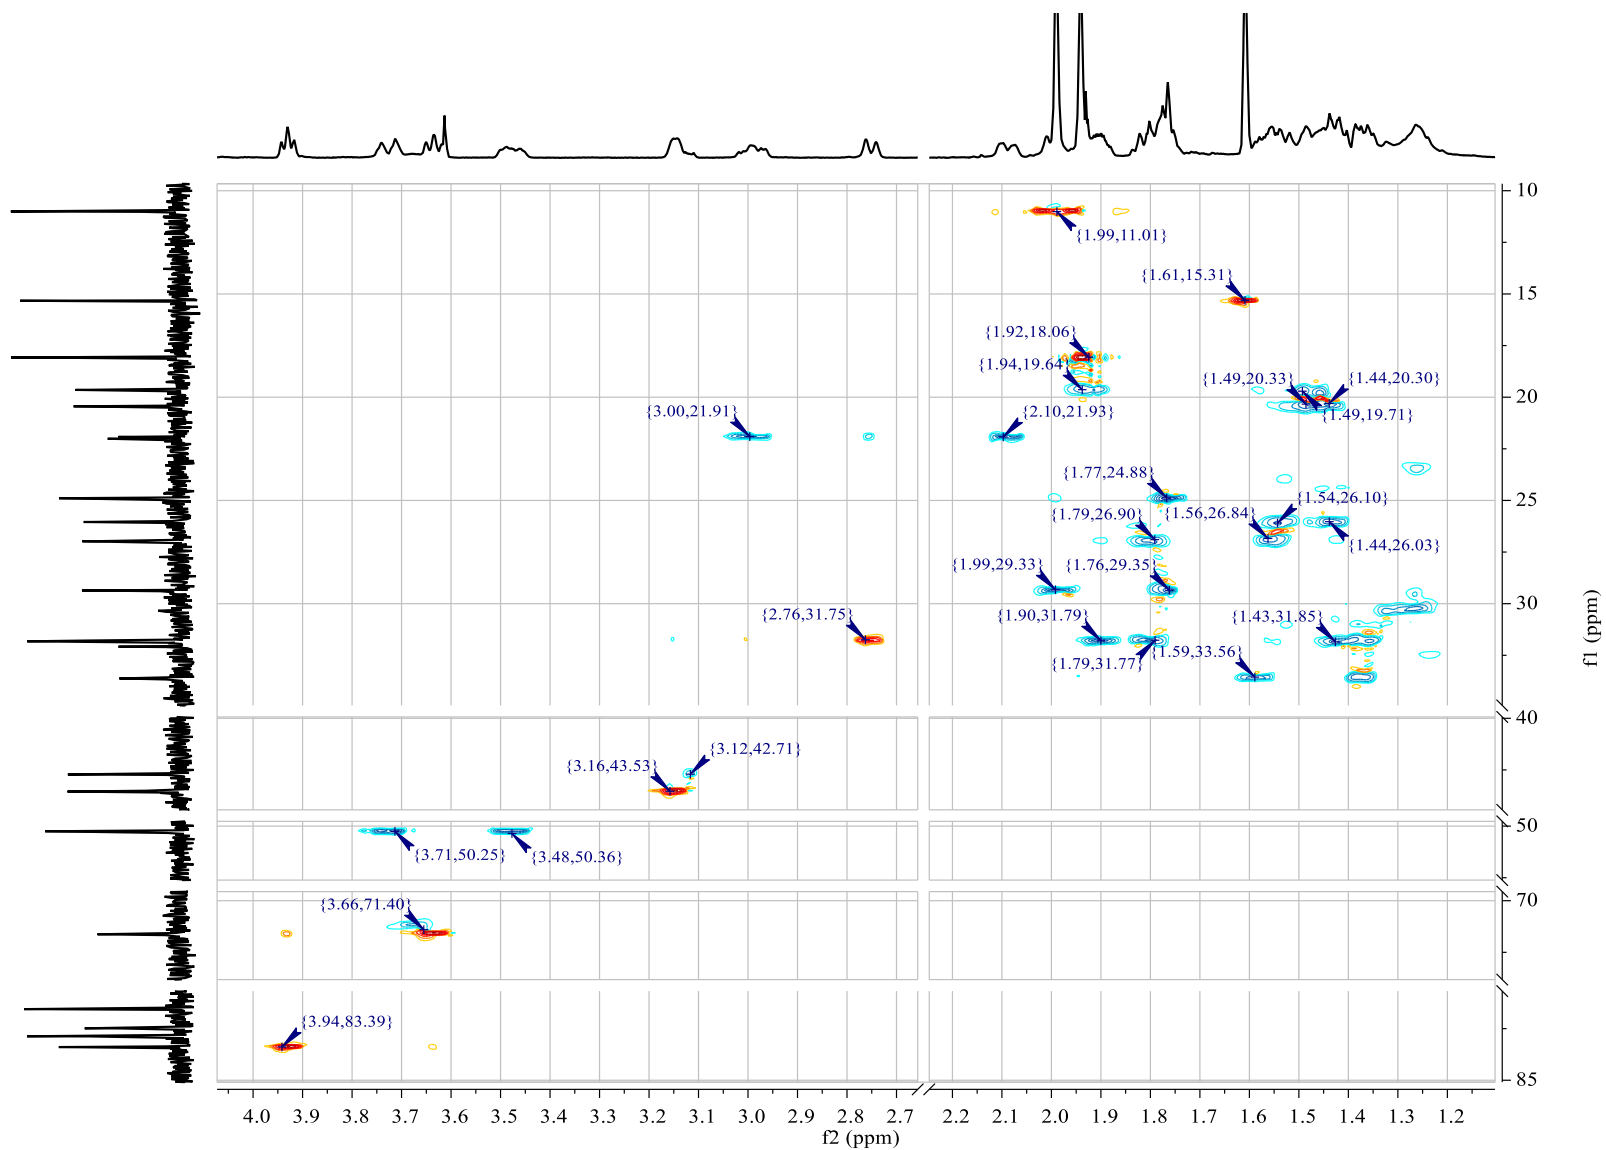

Figure S7: Slice 2 of multiplicity-edited 2D HSQC spectra of 16-Desmethylgymnodimine D (600 MHz Proton frequency, pyridine- $d_5$ ).

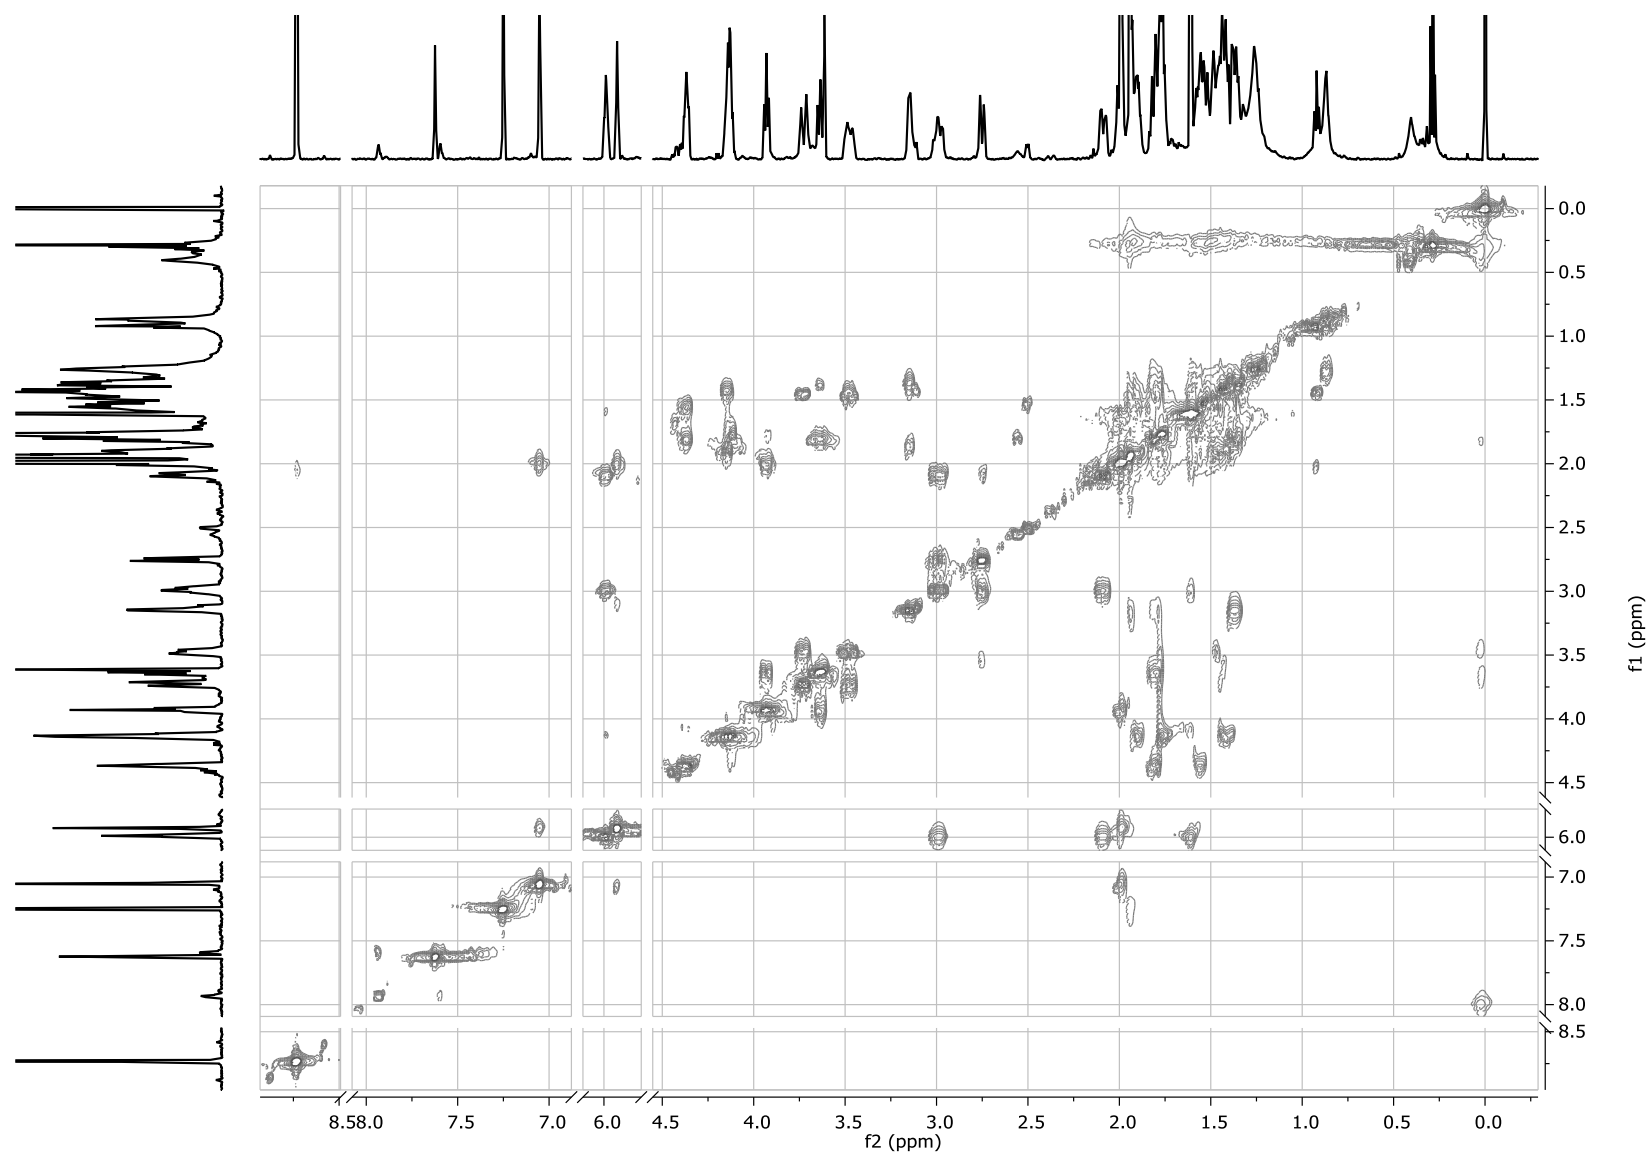

Figure S8: 2D COSY spectra of 16-Desmethylgymnodimine D (600 MHz, pyridine-d<sub>5</sub>).

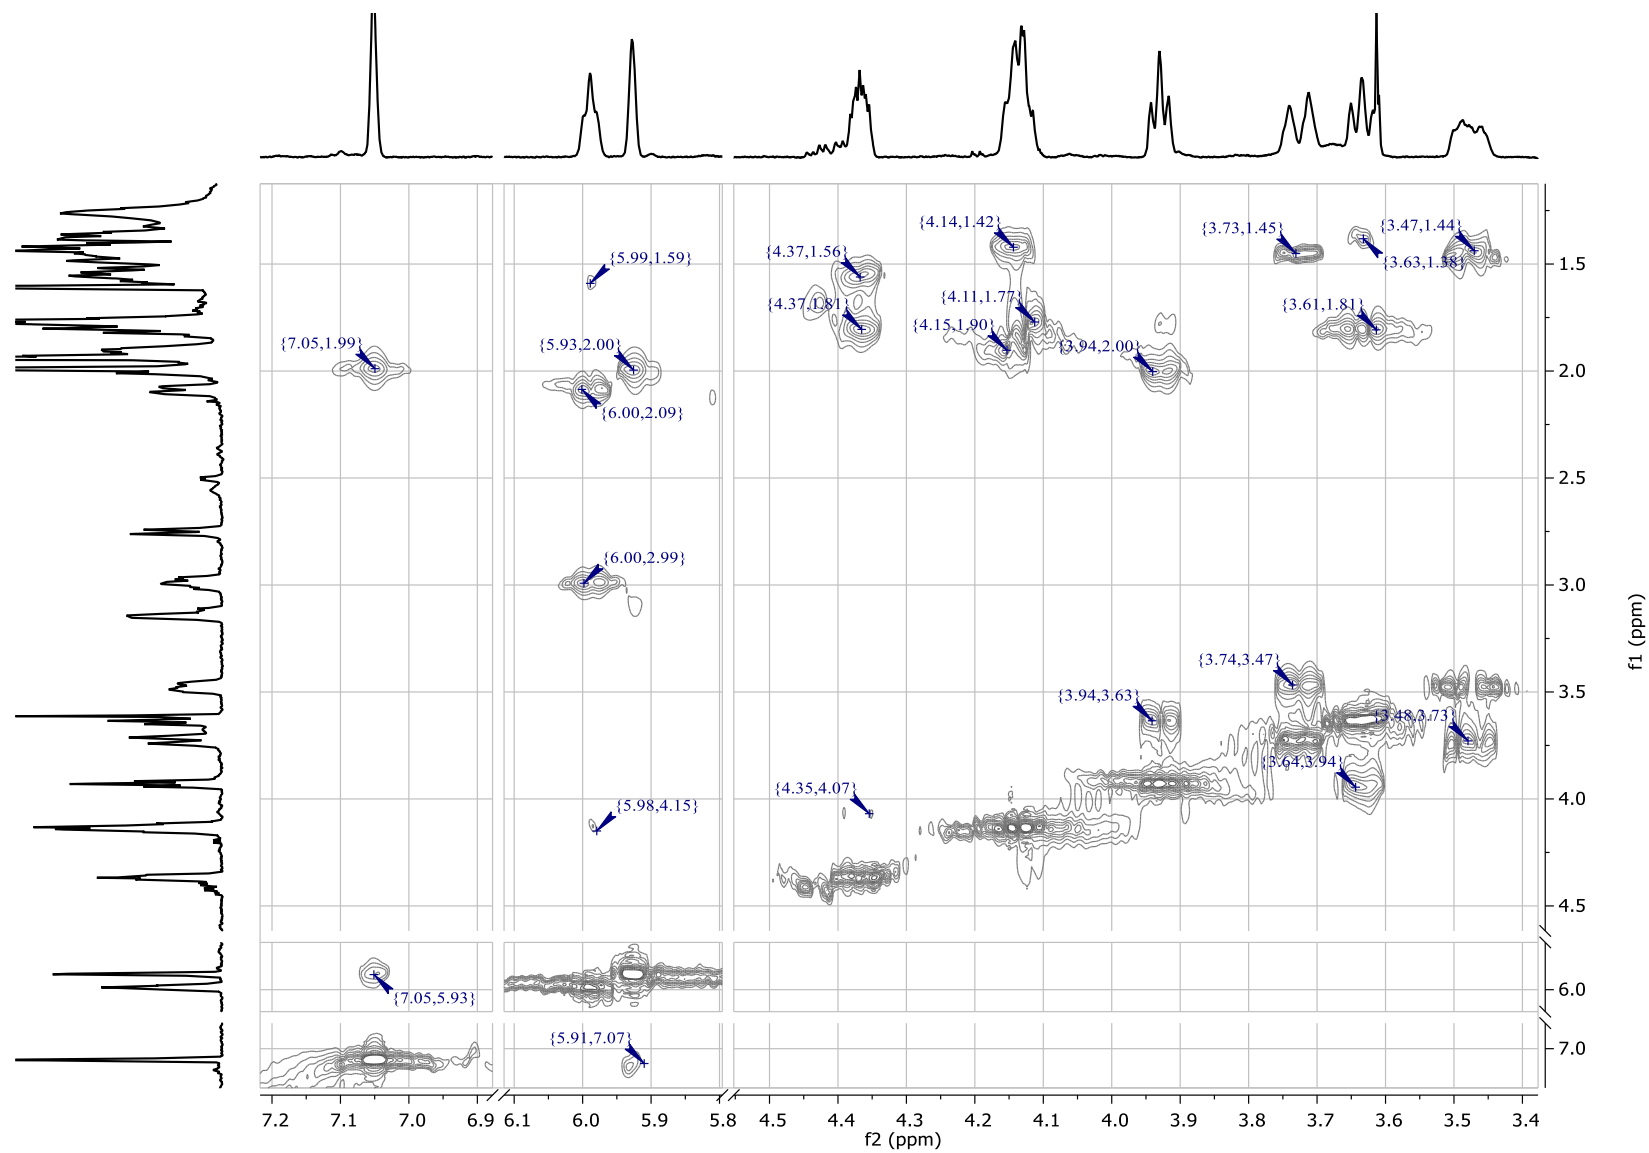

Figure S9: Slice 1 of 2D COSY spectra of 16-Desmethylgymnodimine D (600 MHz, pyridine-d<sub>5</sub>).

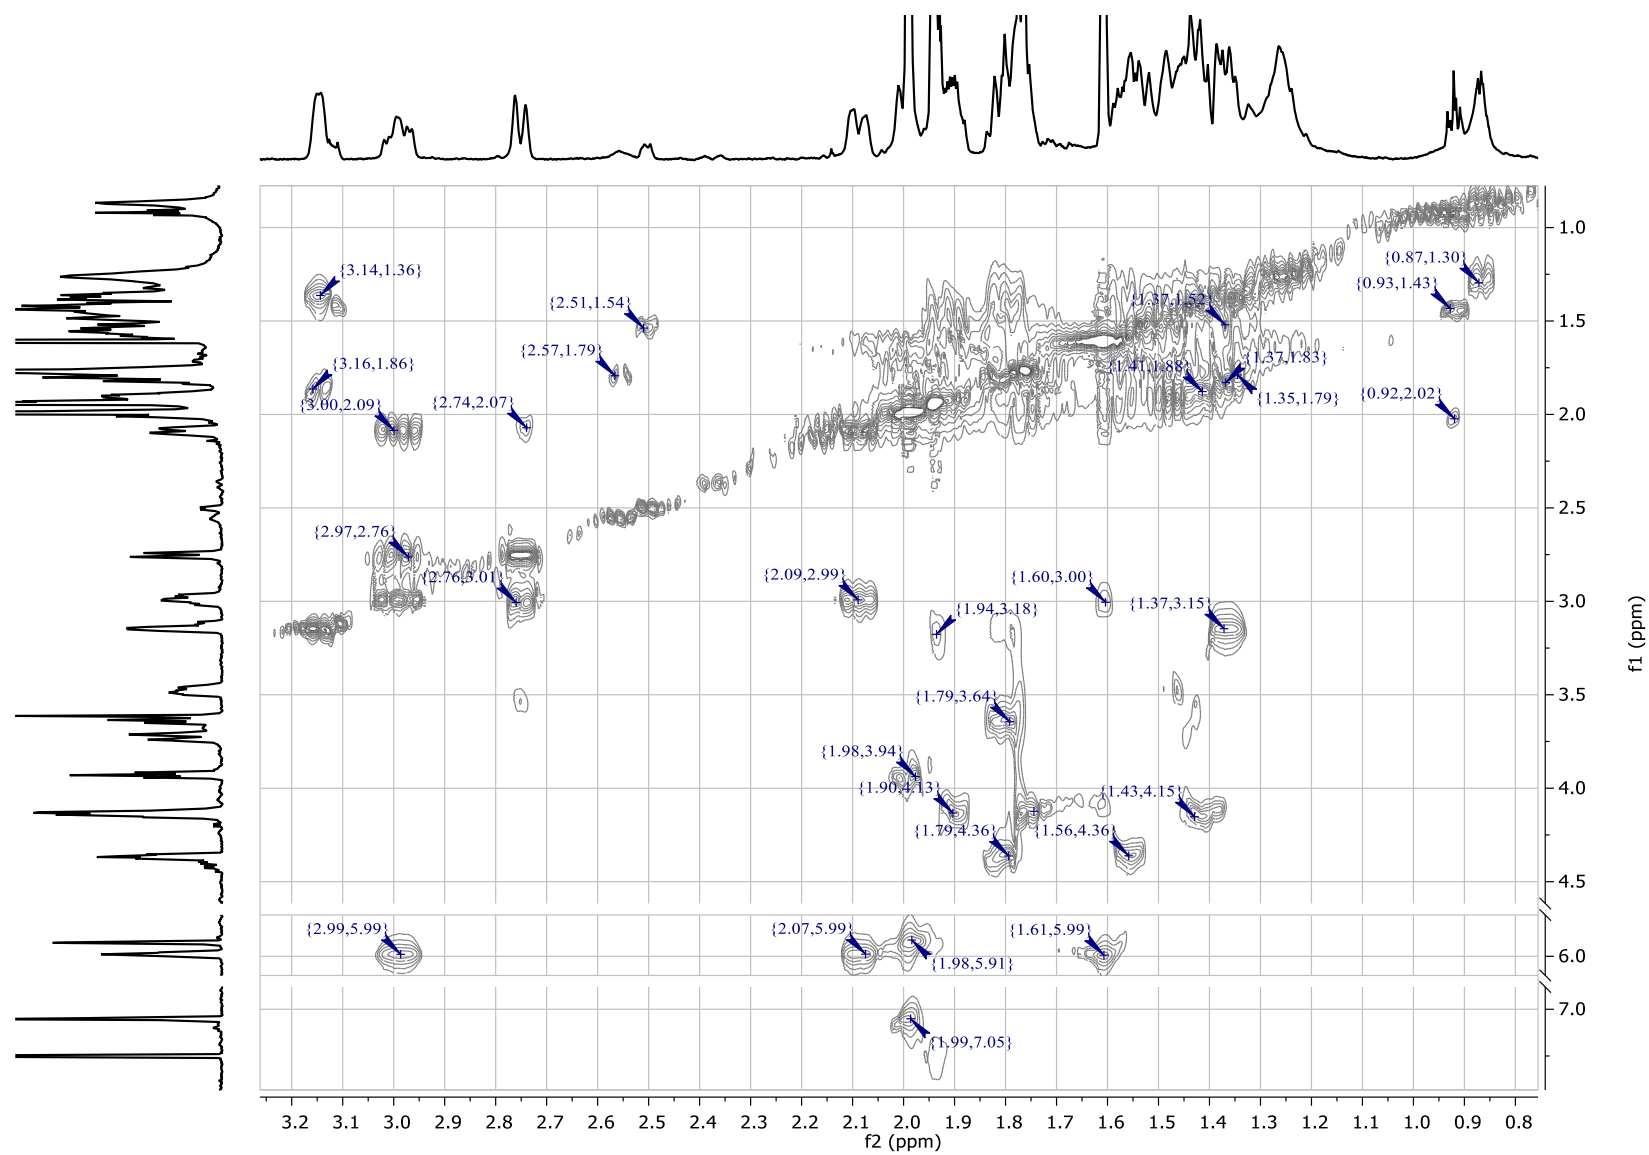

Figure S10: Slice 2 of 2D COSY spectra of 16-Desmethylgymnodimine D (600 MHz, pyridine-d<sub>5</sub>).

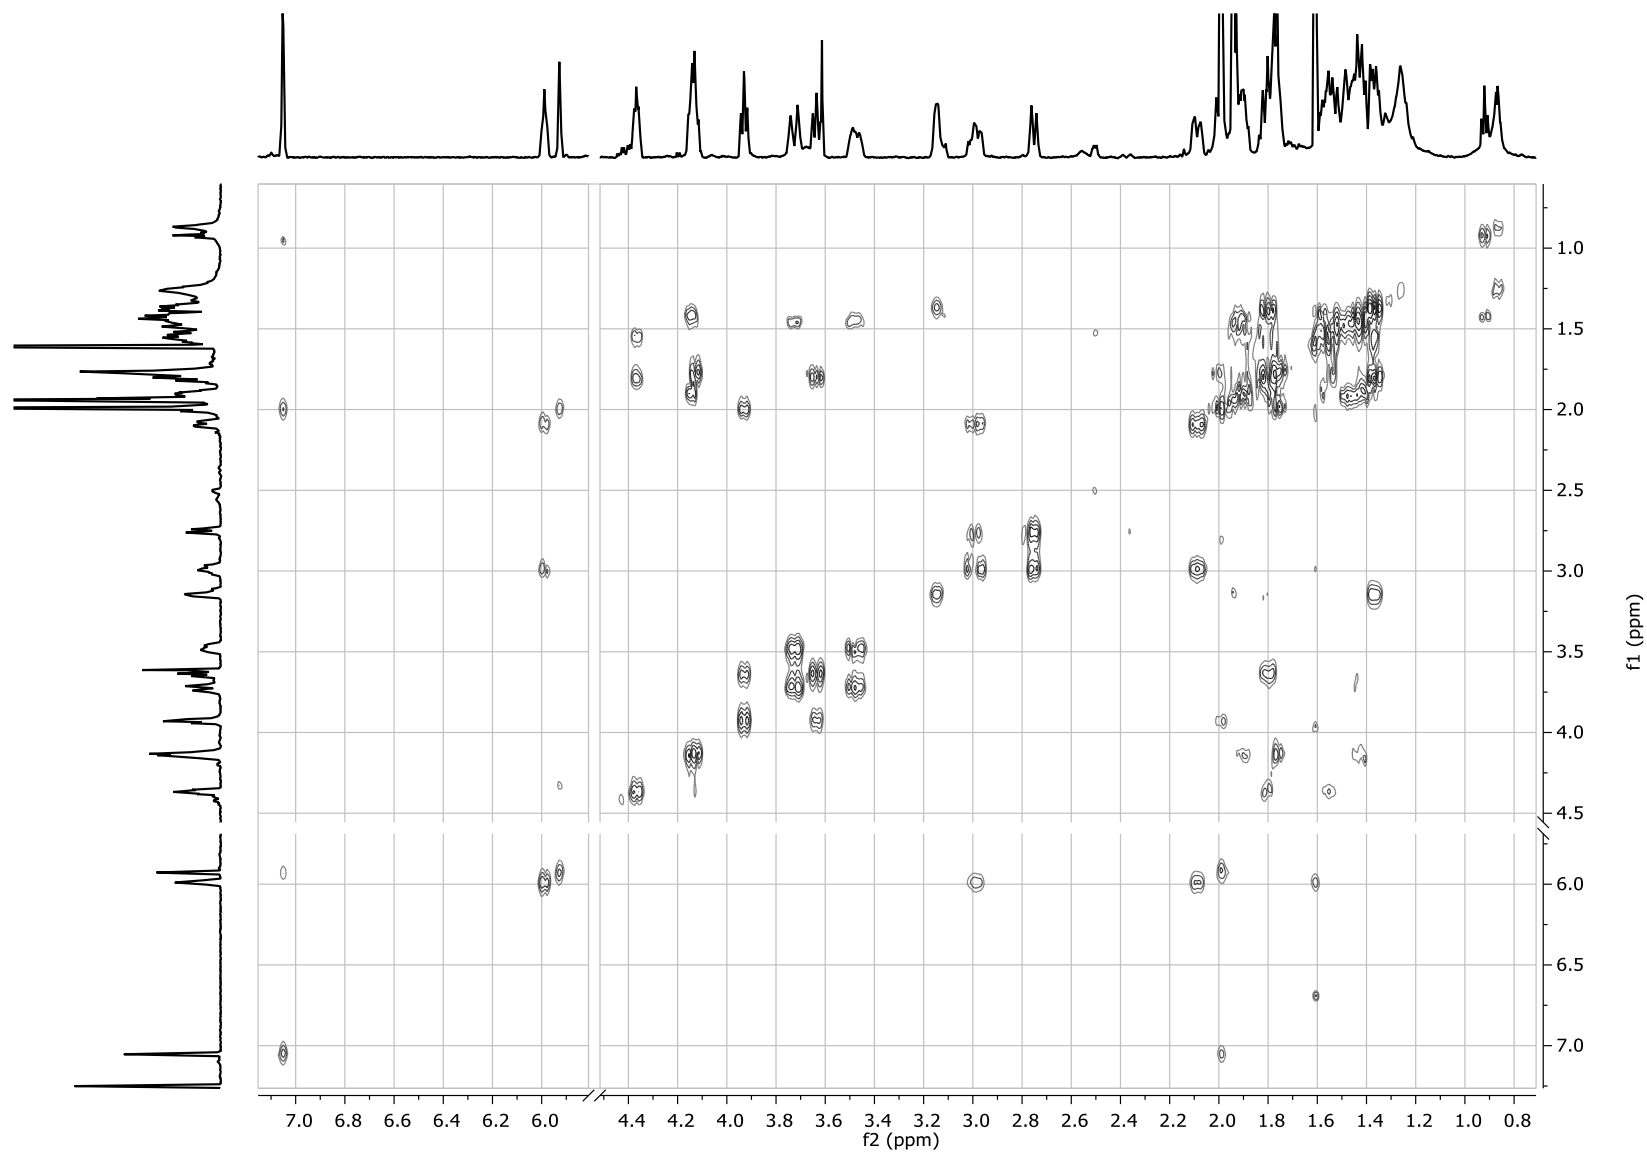

Figure S11: 2D double quantum filtered COSY spectra of 16-Desmethylgymnodimine D (600 MHz, pyridine-d<sub>5</sub>).

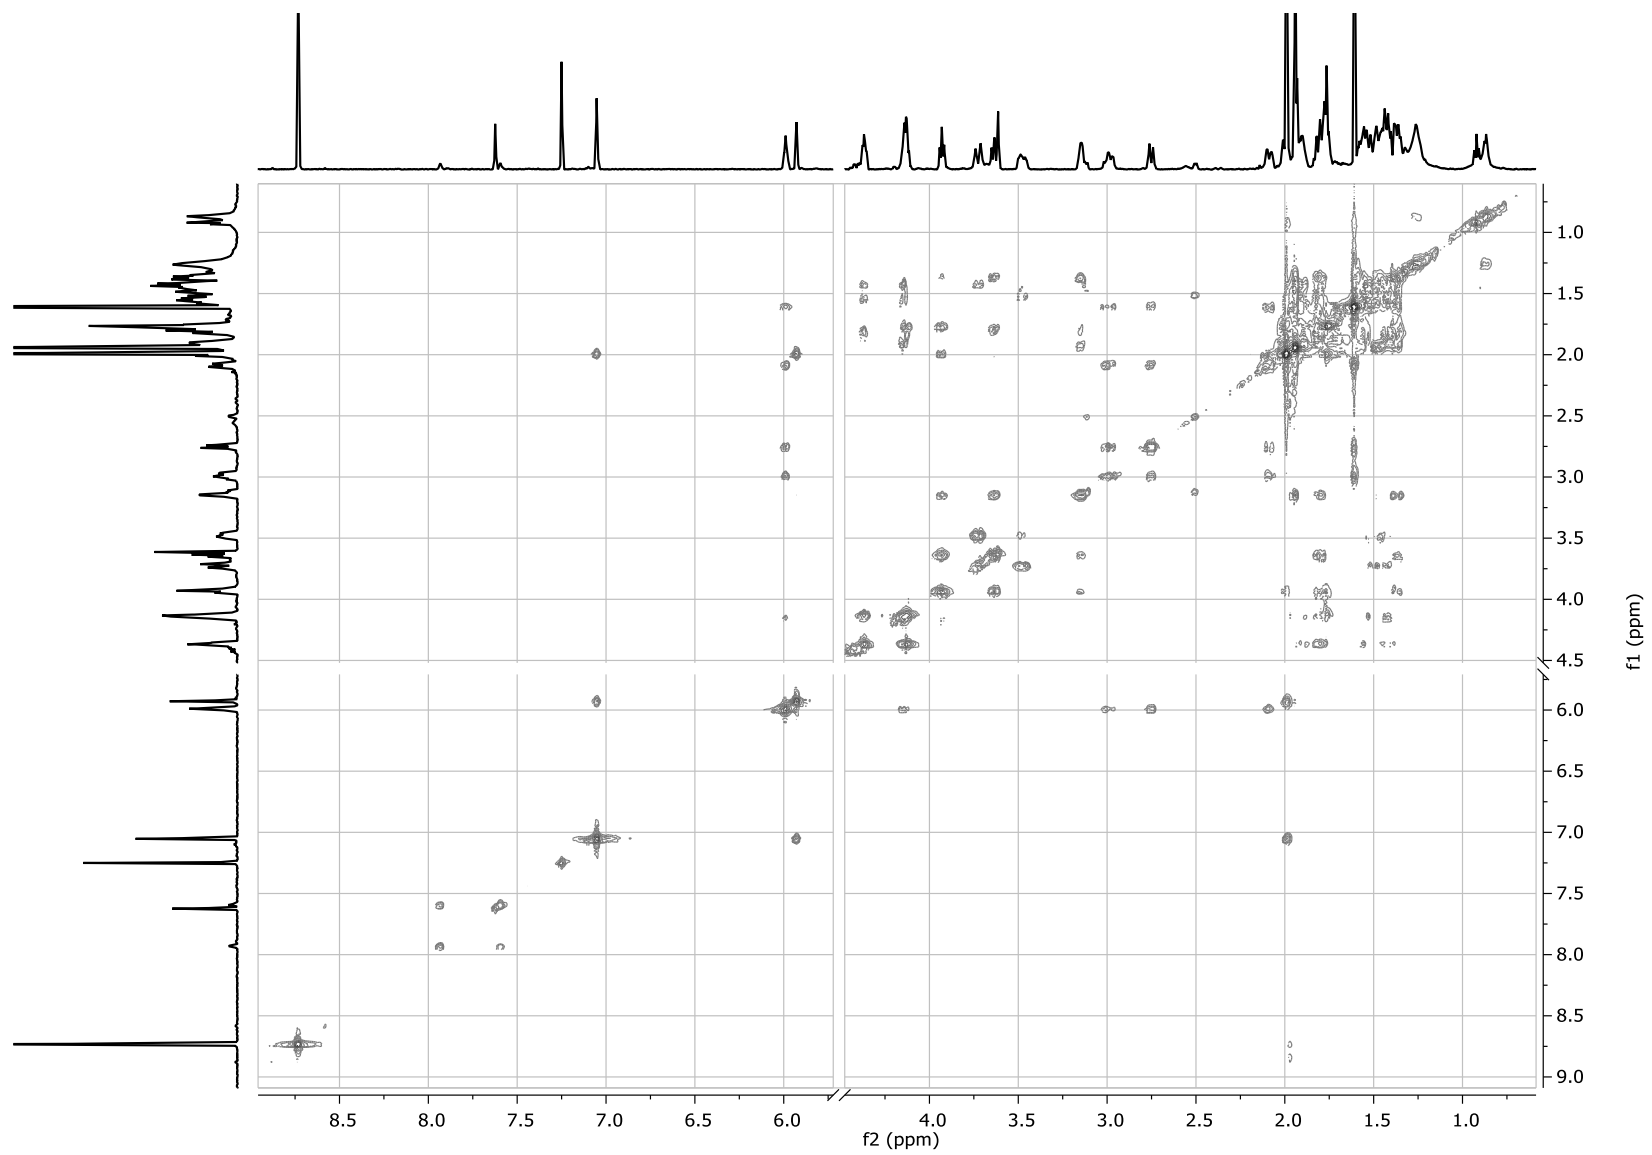

Figure S12: 2D TOCSY spectra of 16-Desmethylgymnodimine D (600 MHz, pyridine-d<sub>5</sub>).

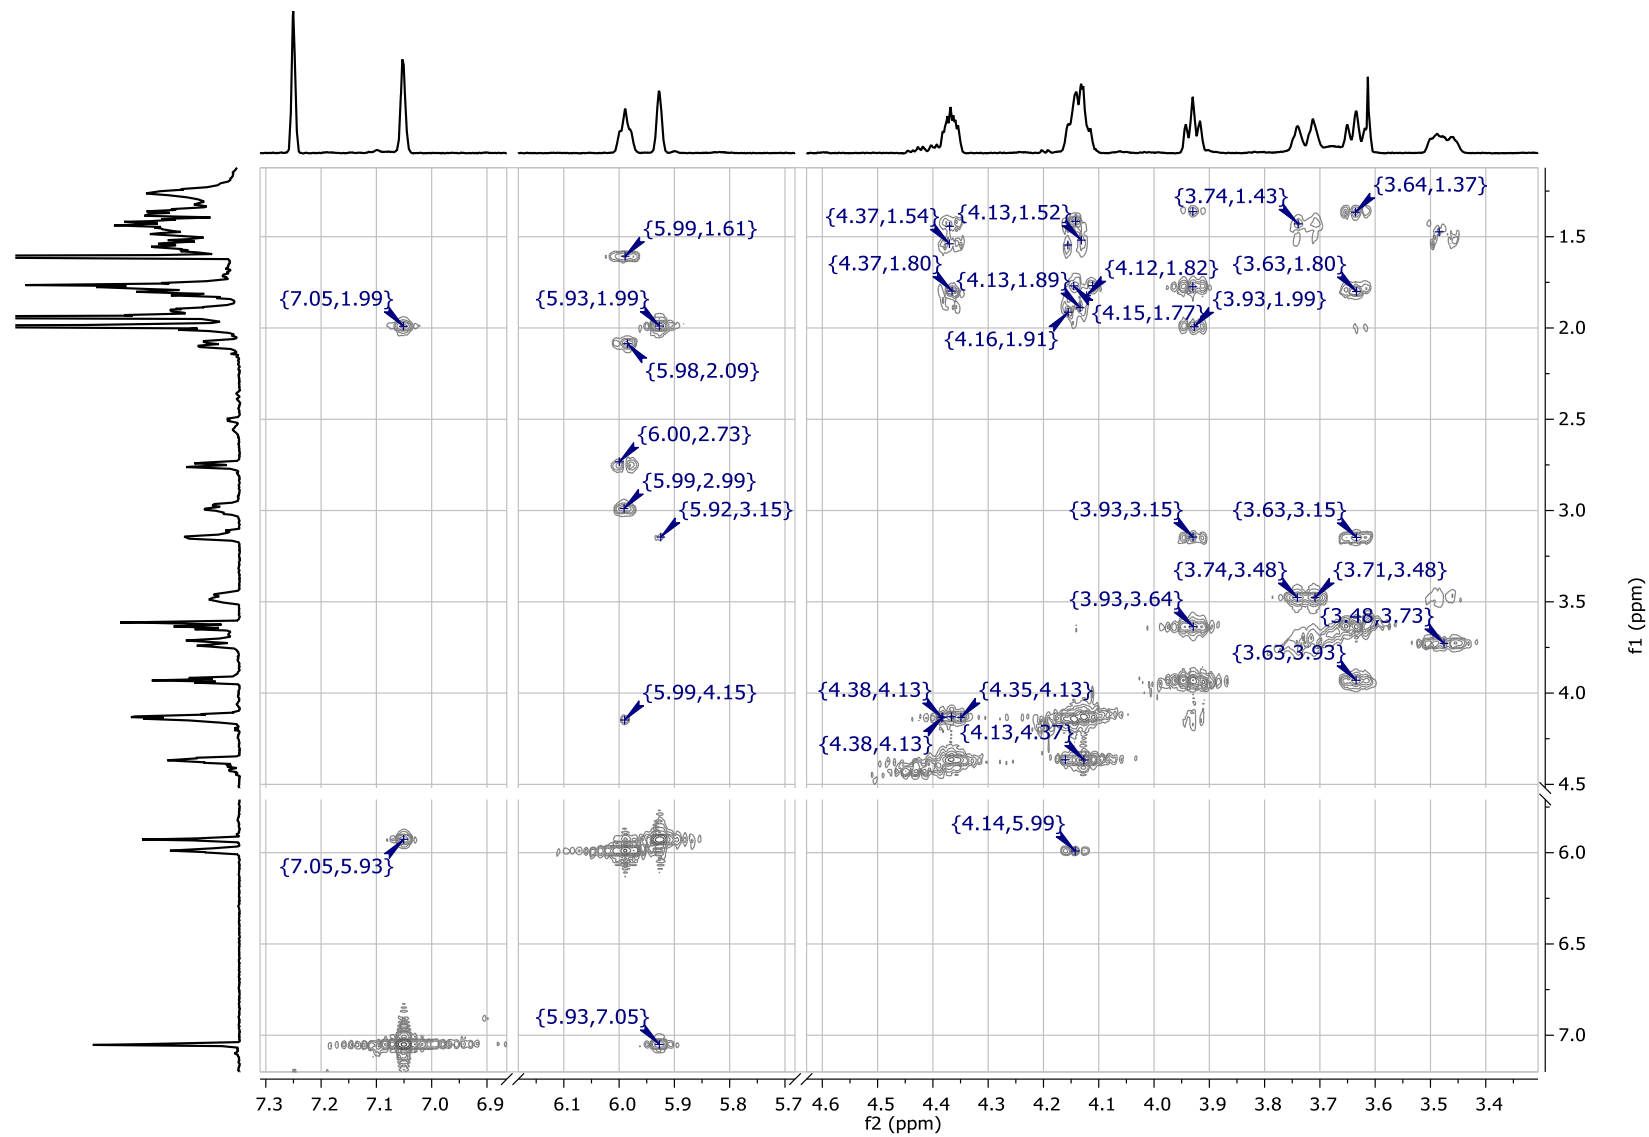

Figure S13: Slice 1 of 2D TOCSY spectra of 16-Desmethylgymnodimine D (600 MHz, pyridine-d<sub>5</sub>).

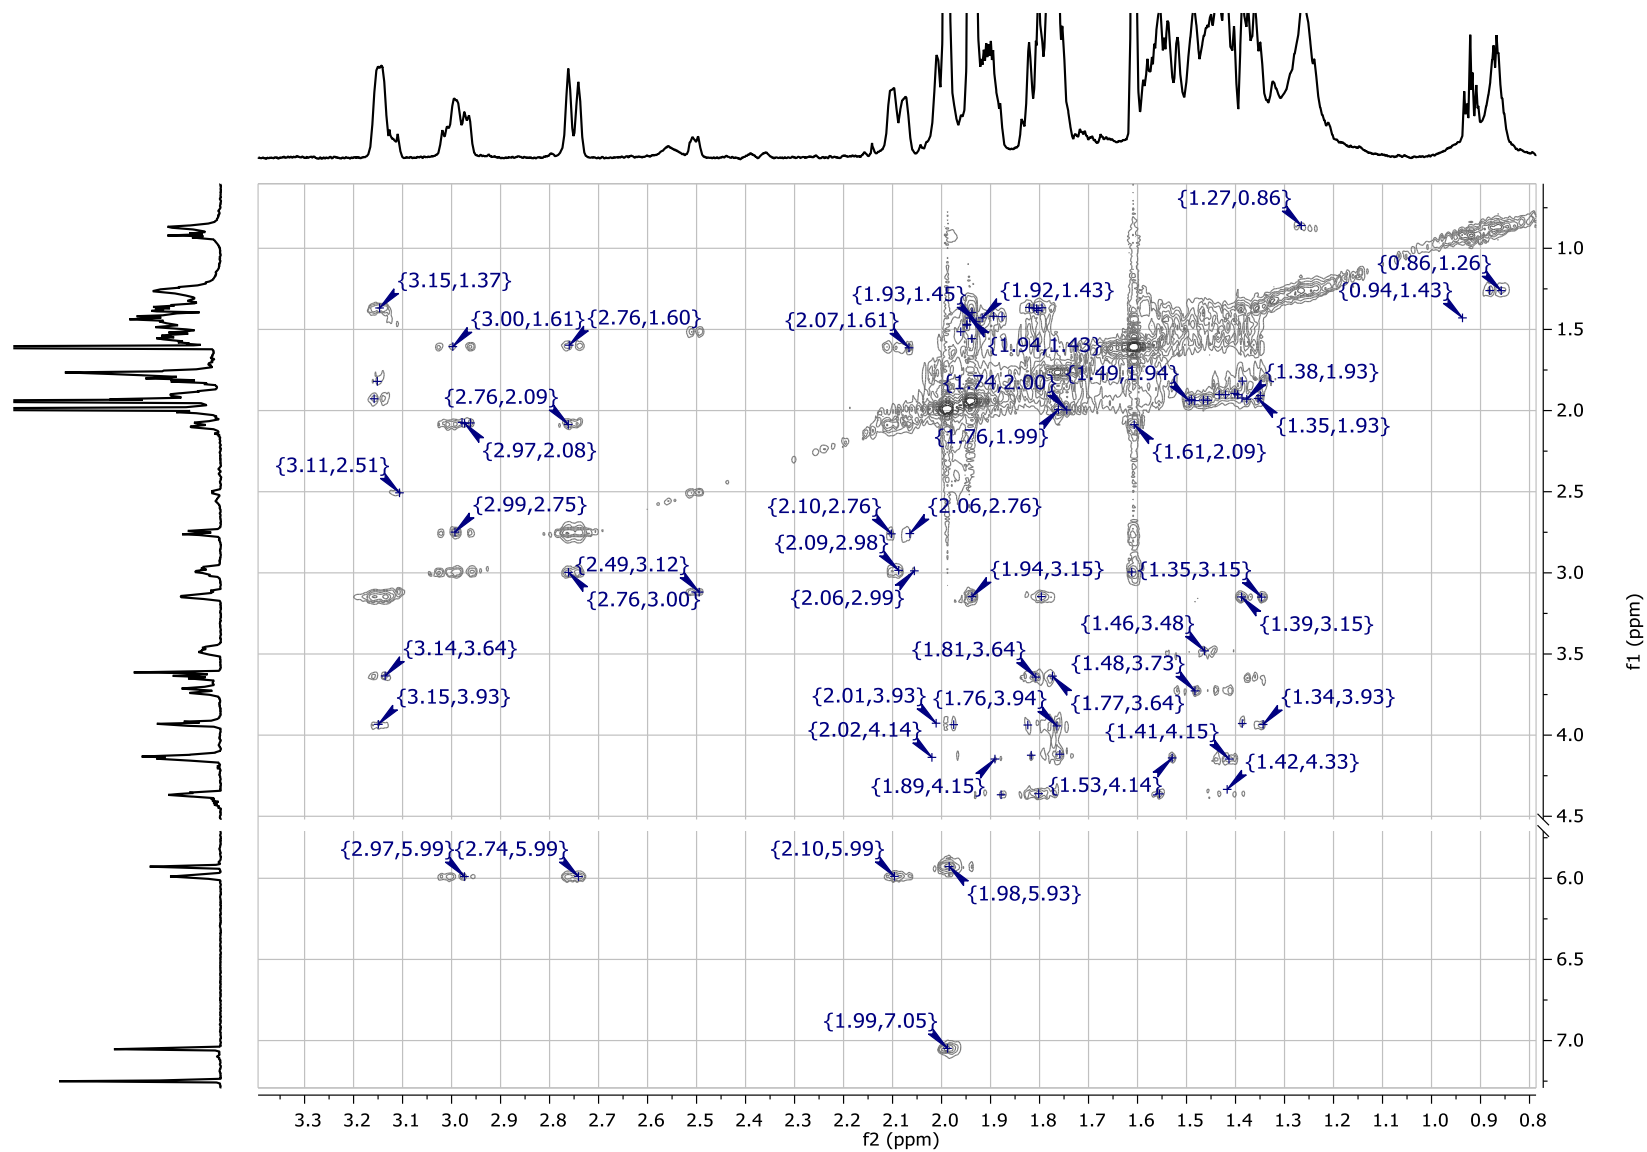

Figure S14: Slice 2 of 2D TOCSY spectra of 16-Desmethylgymnodimine D (600 MHz, pyridine-d<sub>5</sub>).



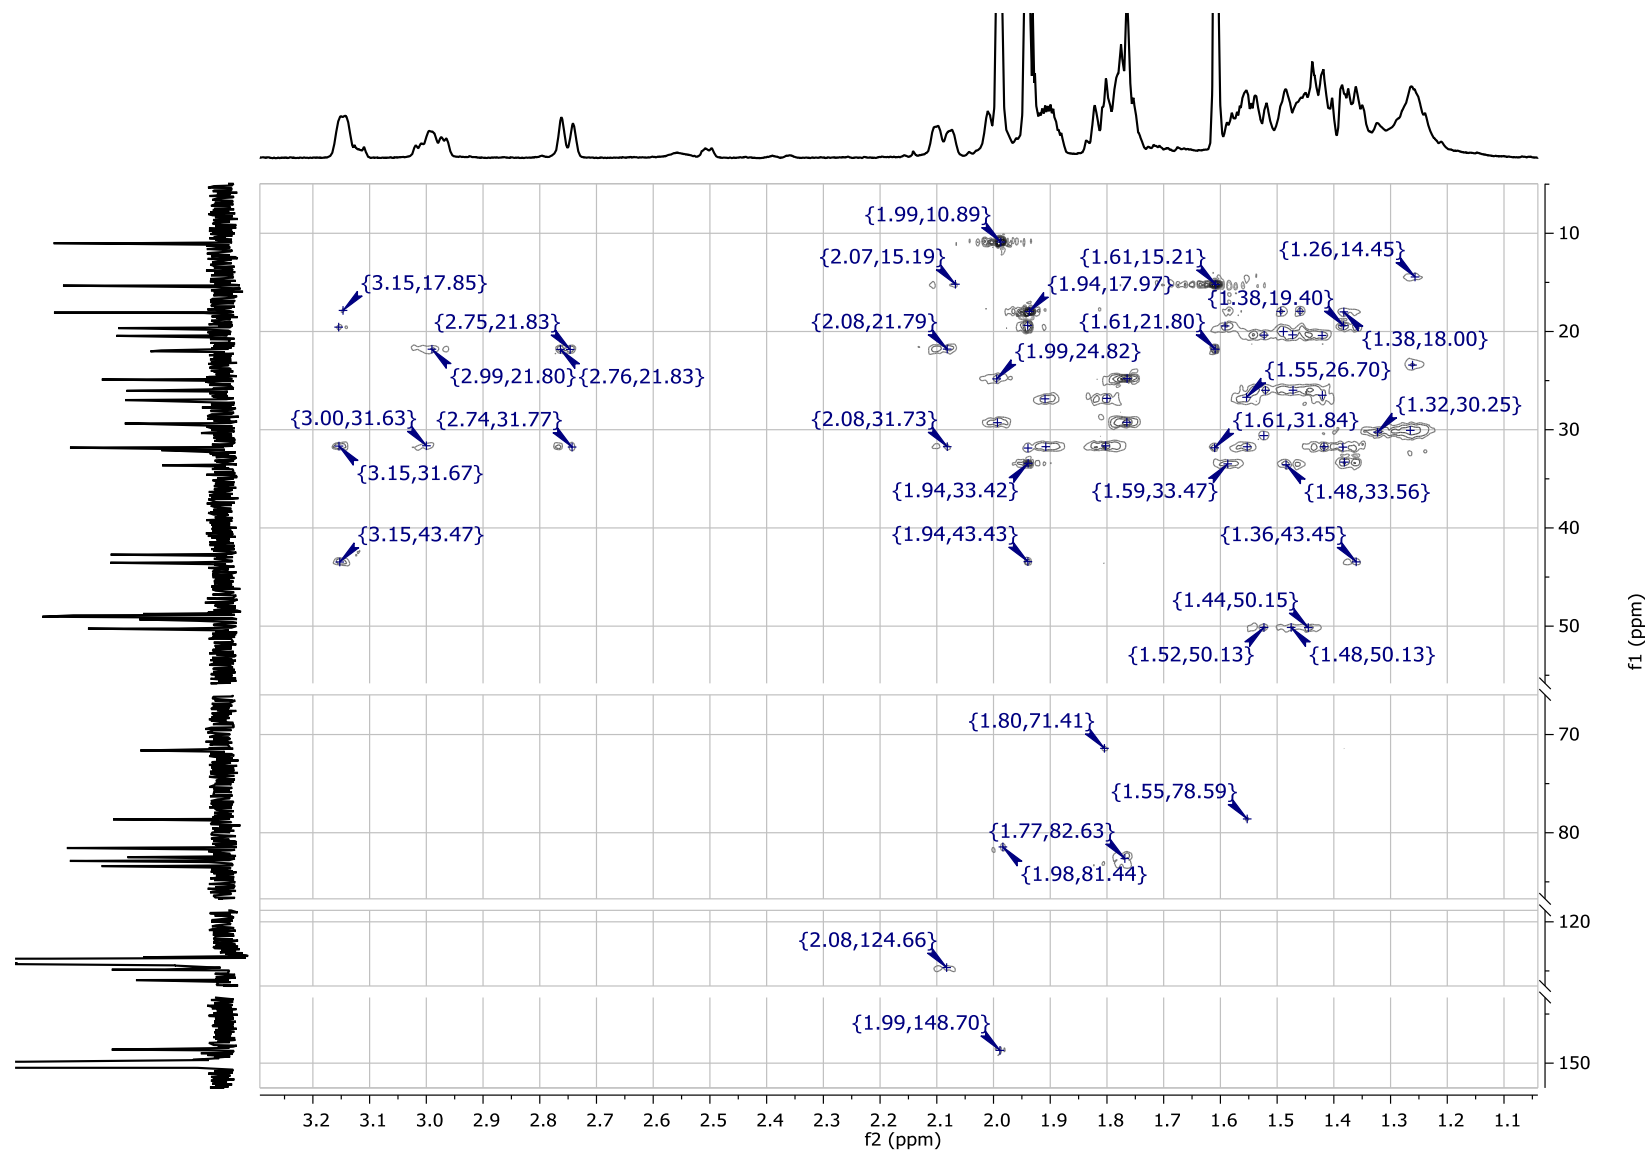

Figure S15: HSQC-TOCSY spectra of 16-Desmethylgymnodimine D (600 MHz Proton frequency, pyridine-d<sub>5</sub>).

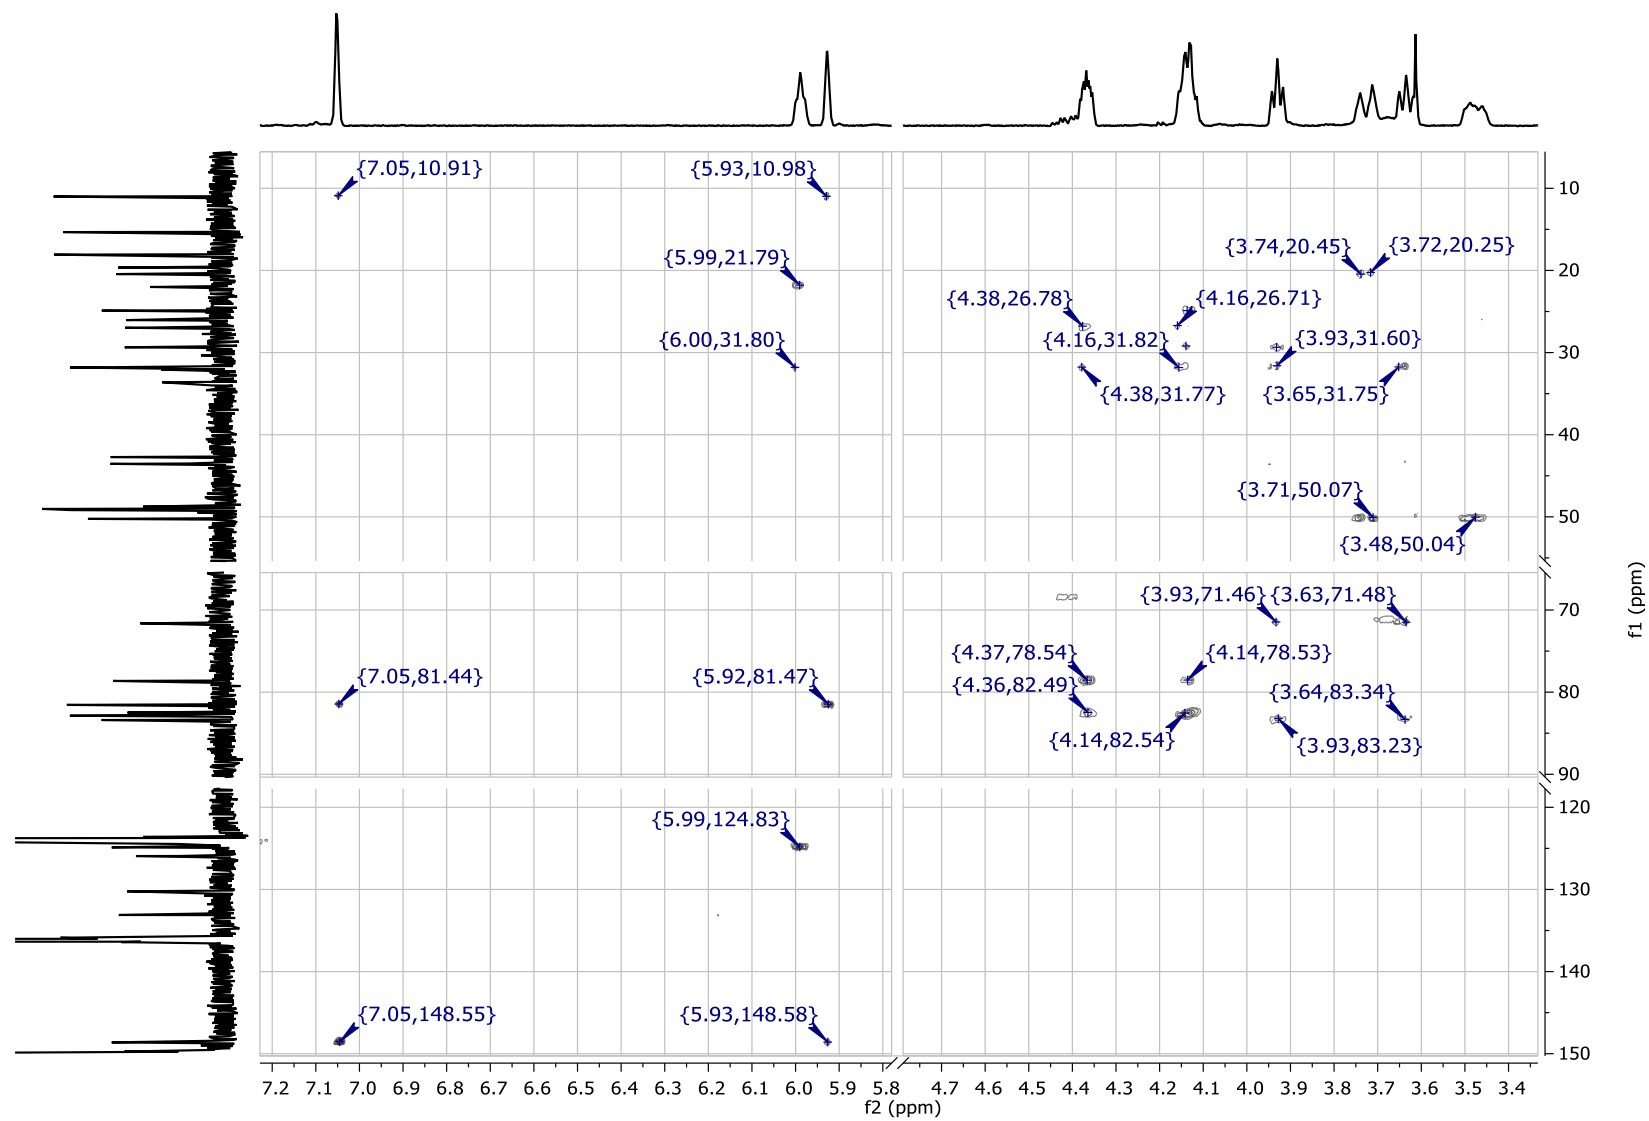

Figure S16: Slice 1 of HSQC-TOCSY spectra of 16-Desmethylgymnodimine D (600 MHz Proton frequency, pyridine-d<sub>5</sub>).



Figure S17: Slice 2 of HSQC-TOCSY spectra of 16-Desmethylgymnodimine D (600 MHz Proton frequency, pyridine-d<sub>5</sub>).

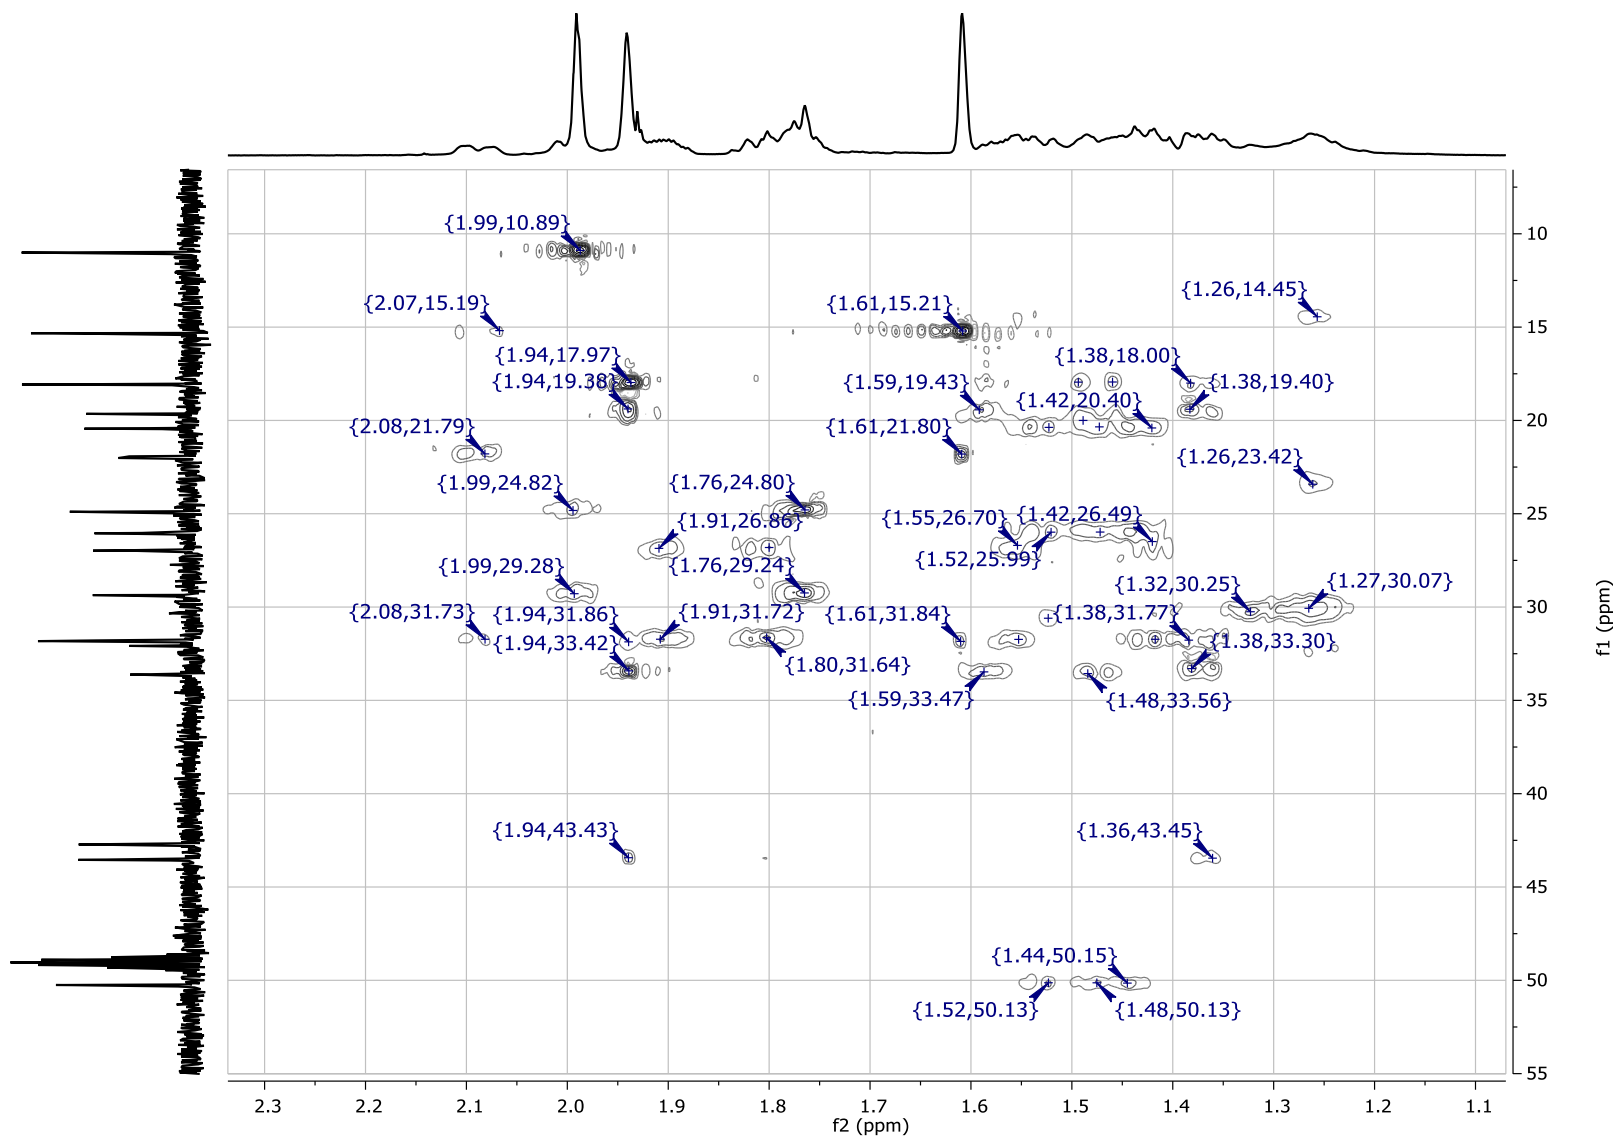

Figure S18: Slice 3 of HSQC-TOCSY spectra of 16-Desmethylgymnodimine D (600 MHz Proton frequency, pyridine-d<sub>5</sub>).

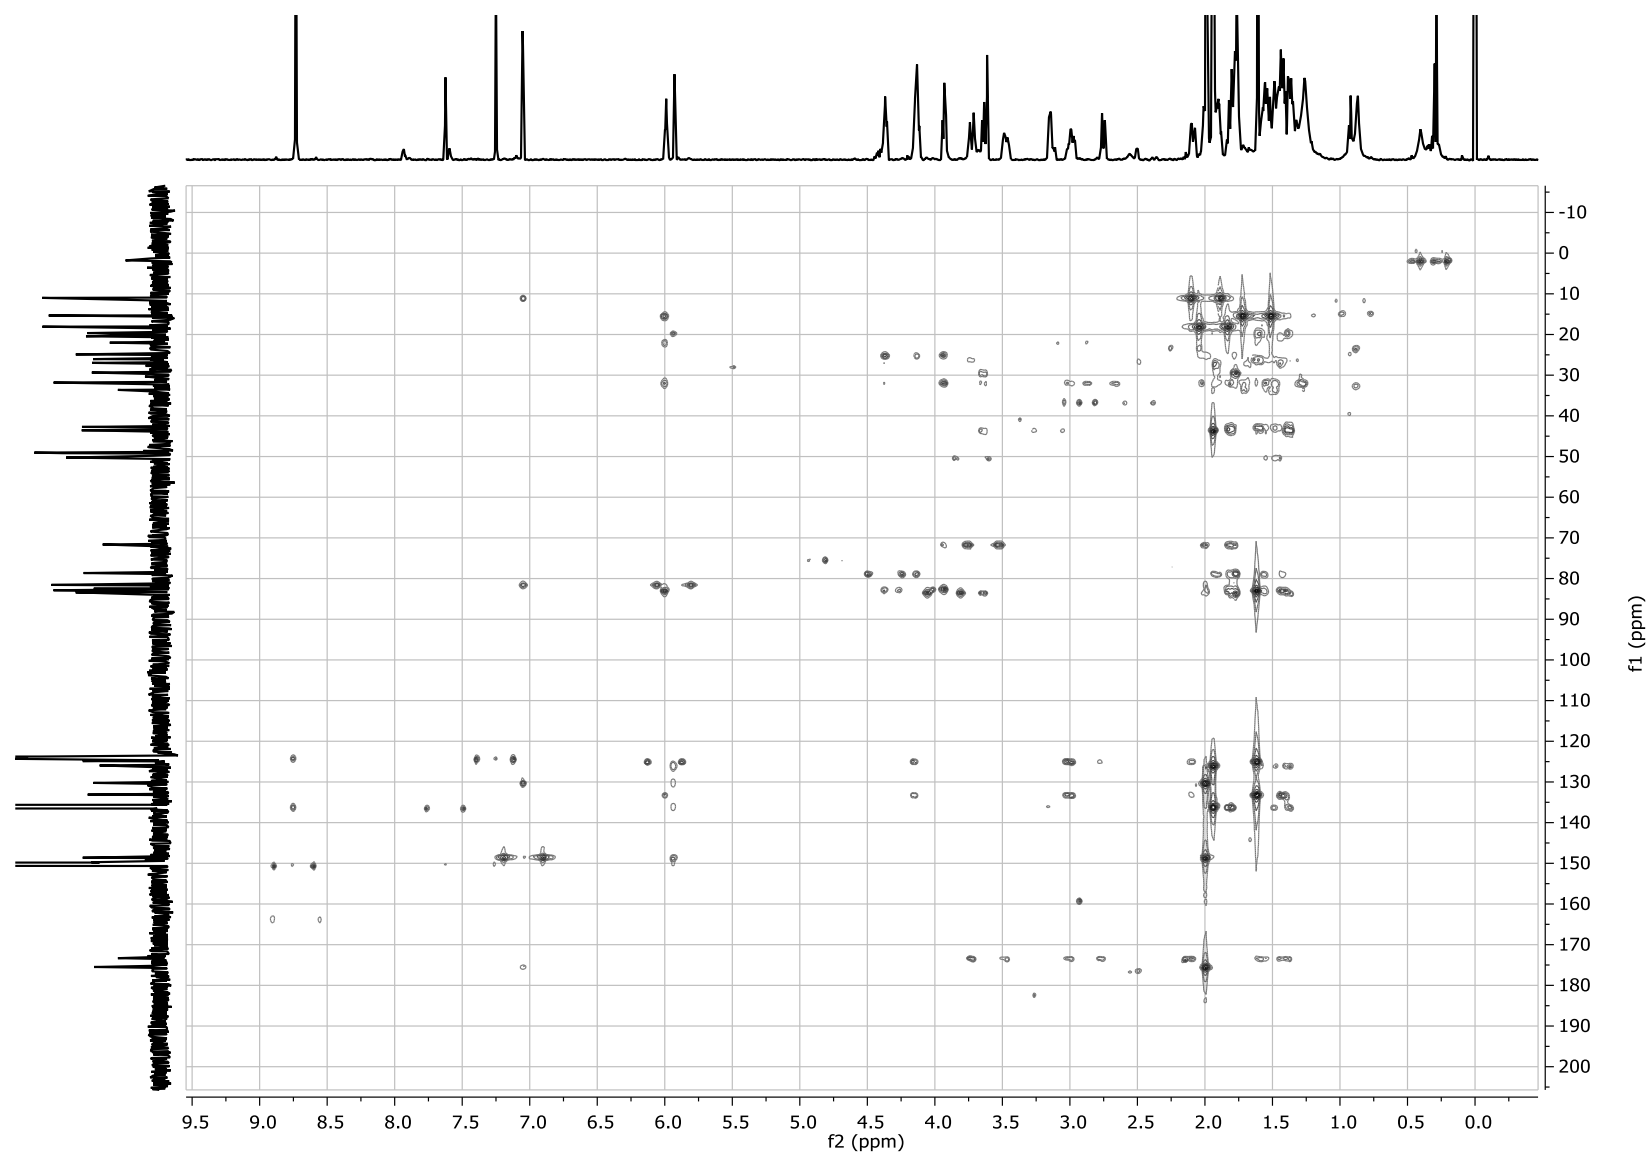

Figure S19: 2D IMPACT-HMBC spectra of 16-Desmethylgymnodimine D (600 MHz Proton frequency, pyridine-d<sub>5</sub>).

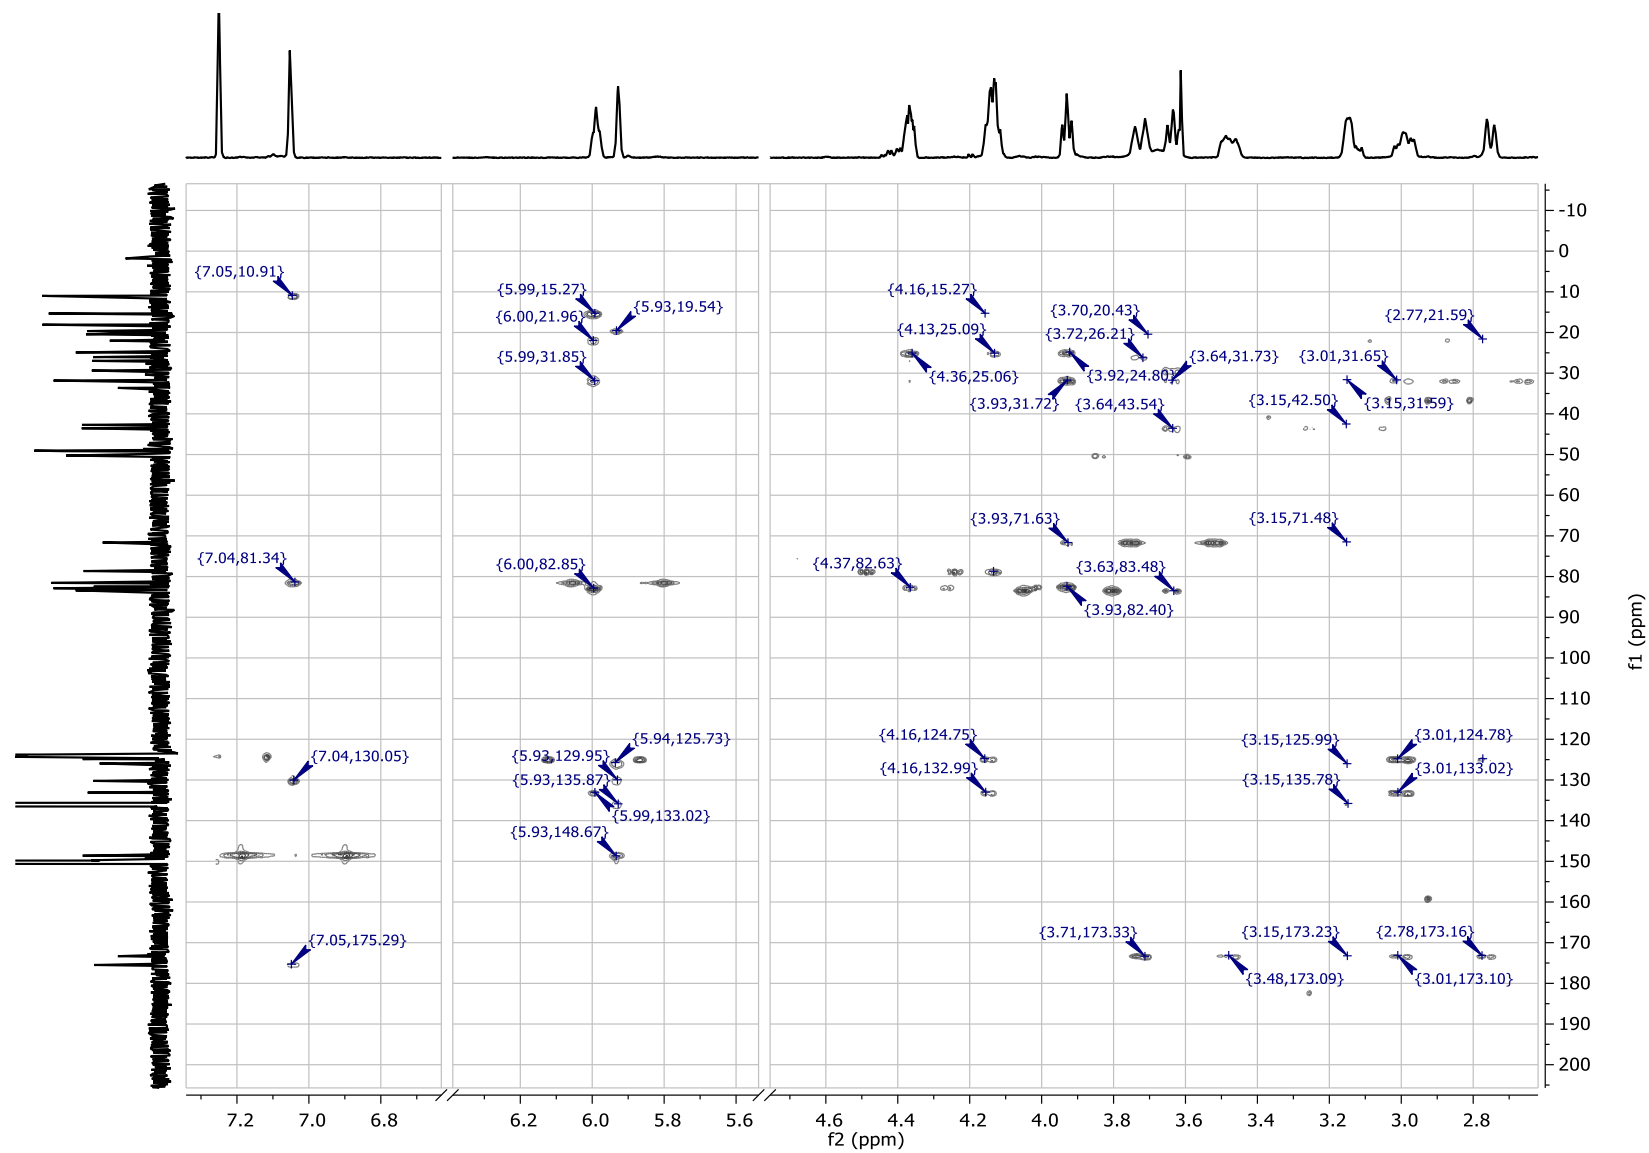

Figure S20: Slice 1 of 2D IMPACT-HMBC spectra of 16-Desmethylgymnodimine D (600 MHz Proton frequency, pyridine-d<sub>5</sub>).

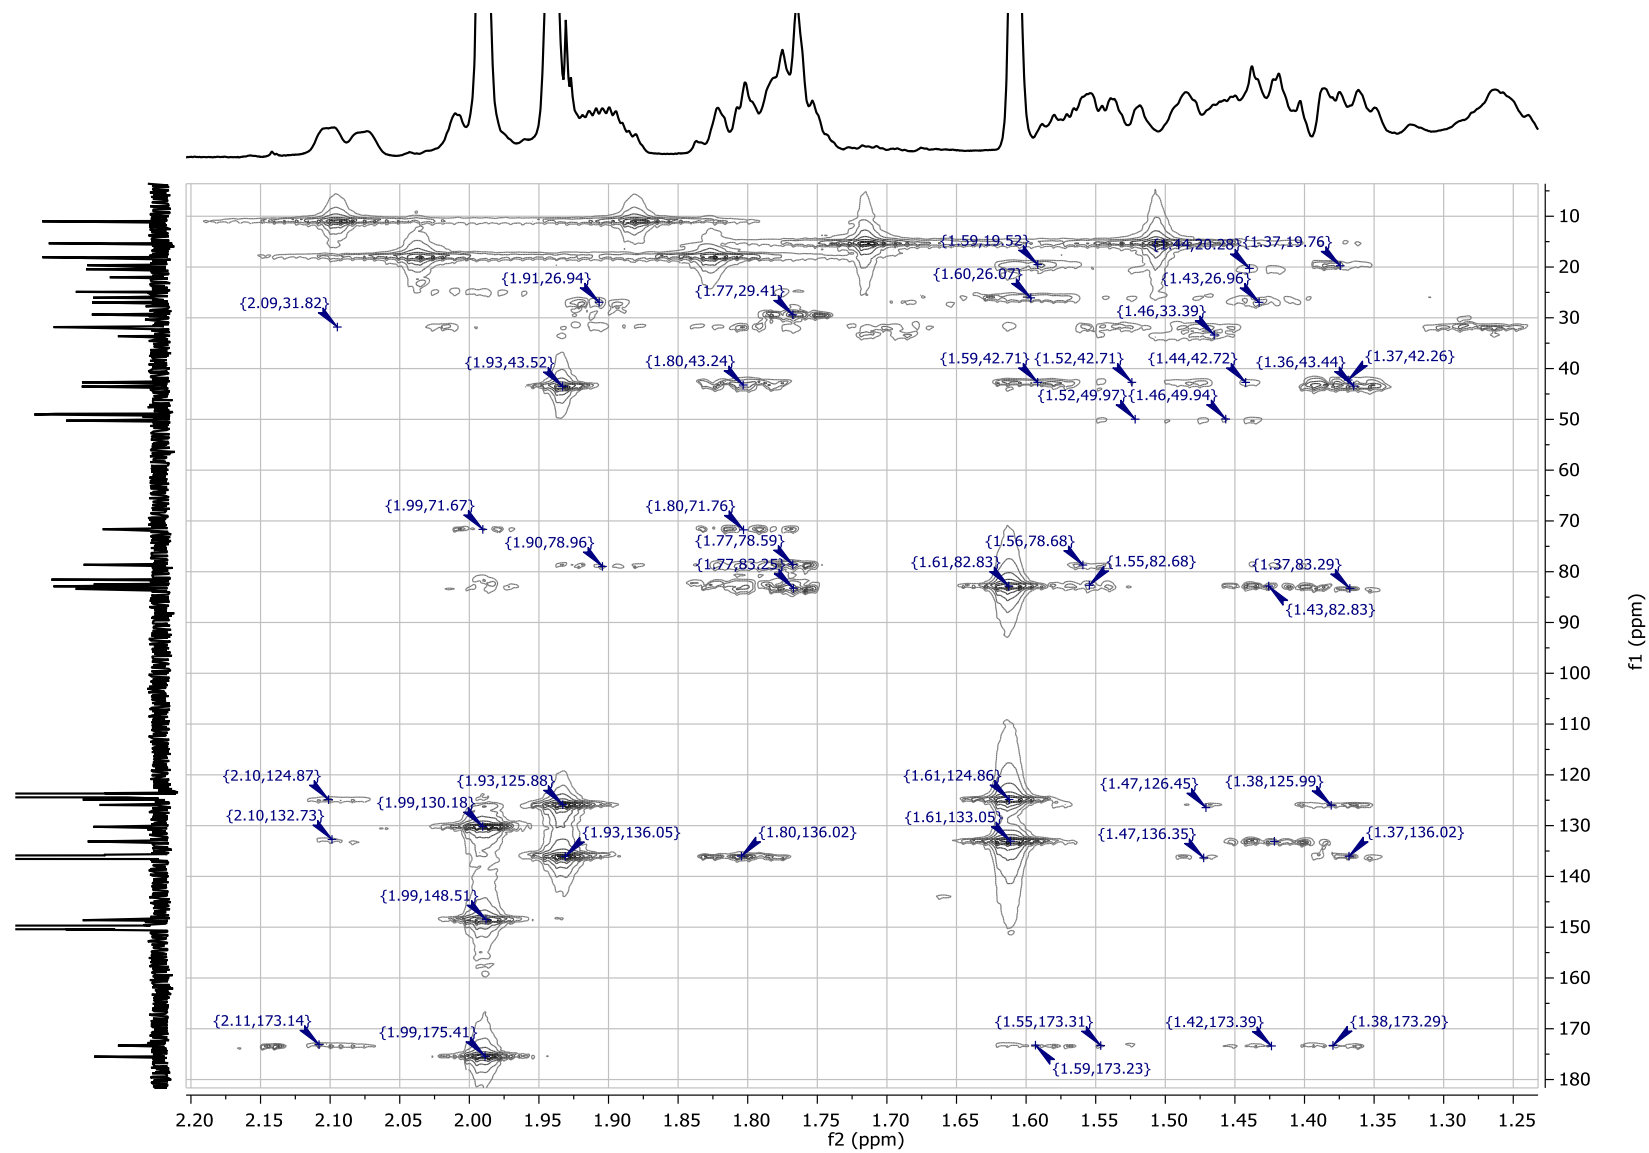

Figure S21: Slice 2 of 2D IMPACT-HMBC spectra of 16-Desmethylgymnodimine D (600 MHz Proton frequency, pyridine-d<sub>5</sub>).

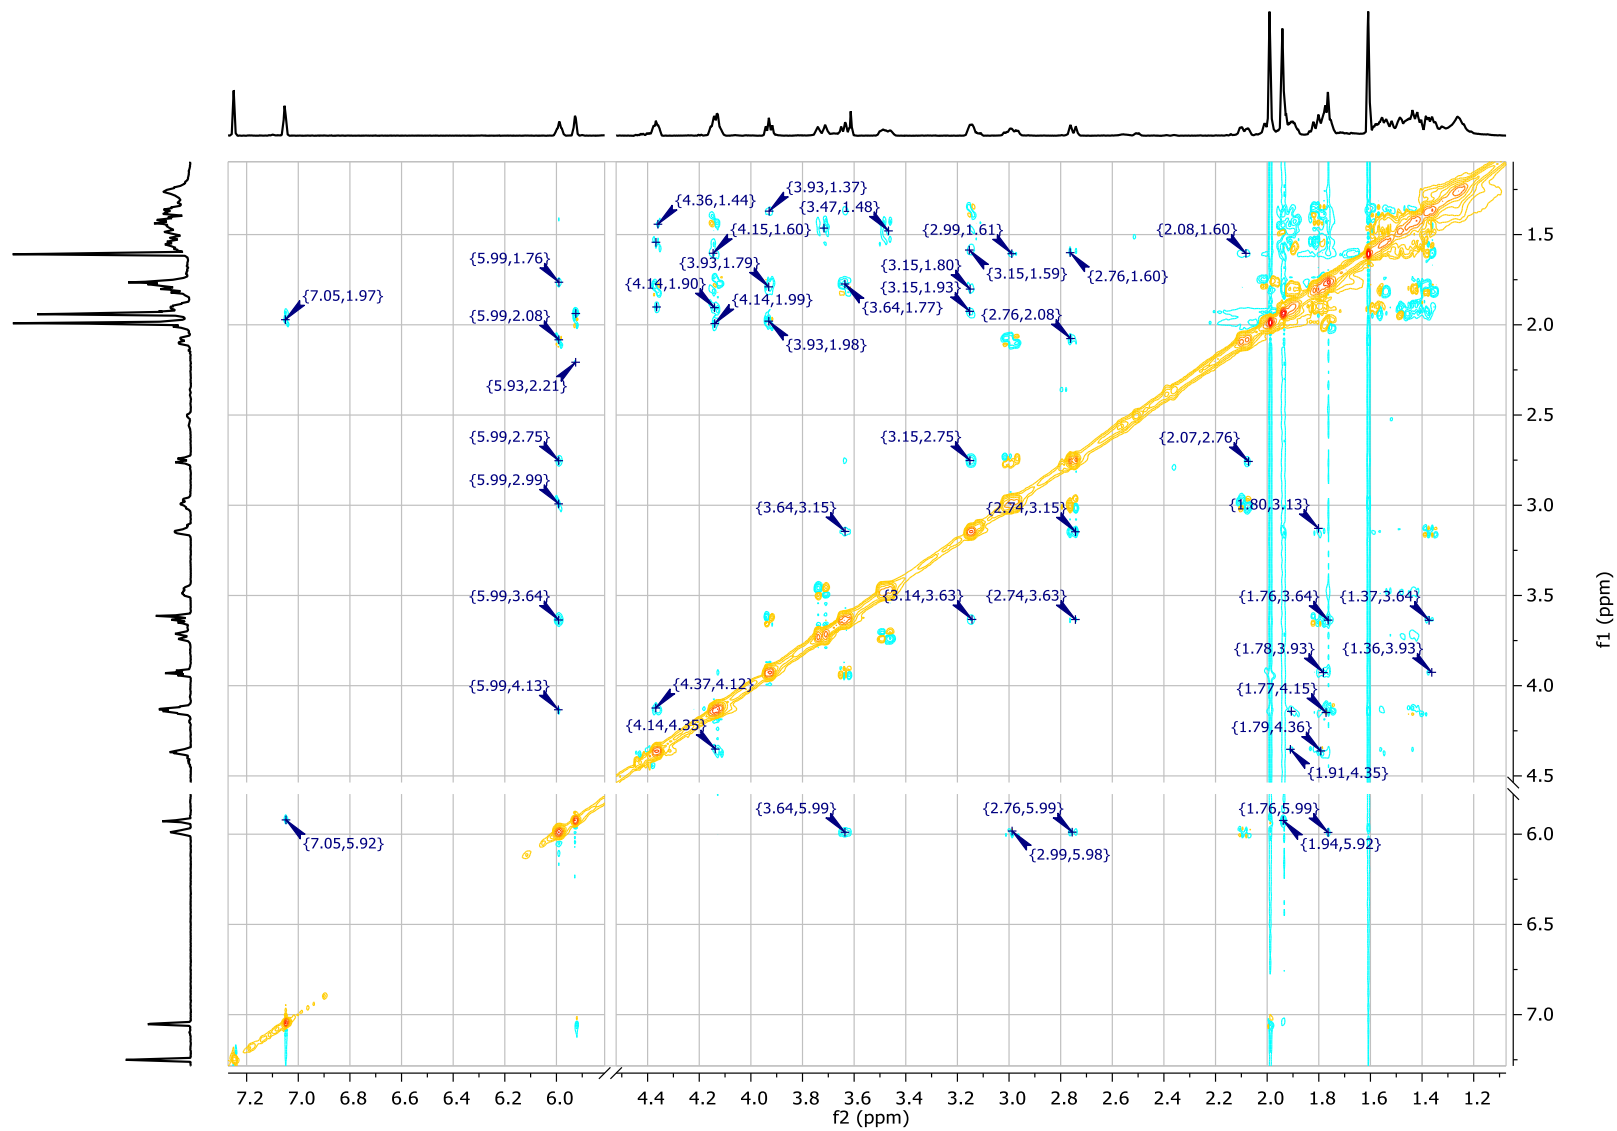

Figure S22: ROESY spectra of 16-Desmethylgymnodimine D (600 MHz Proton frequency, pyridine-d<sub>5</sub>).



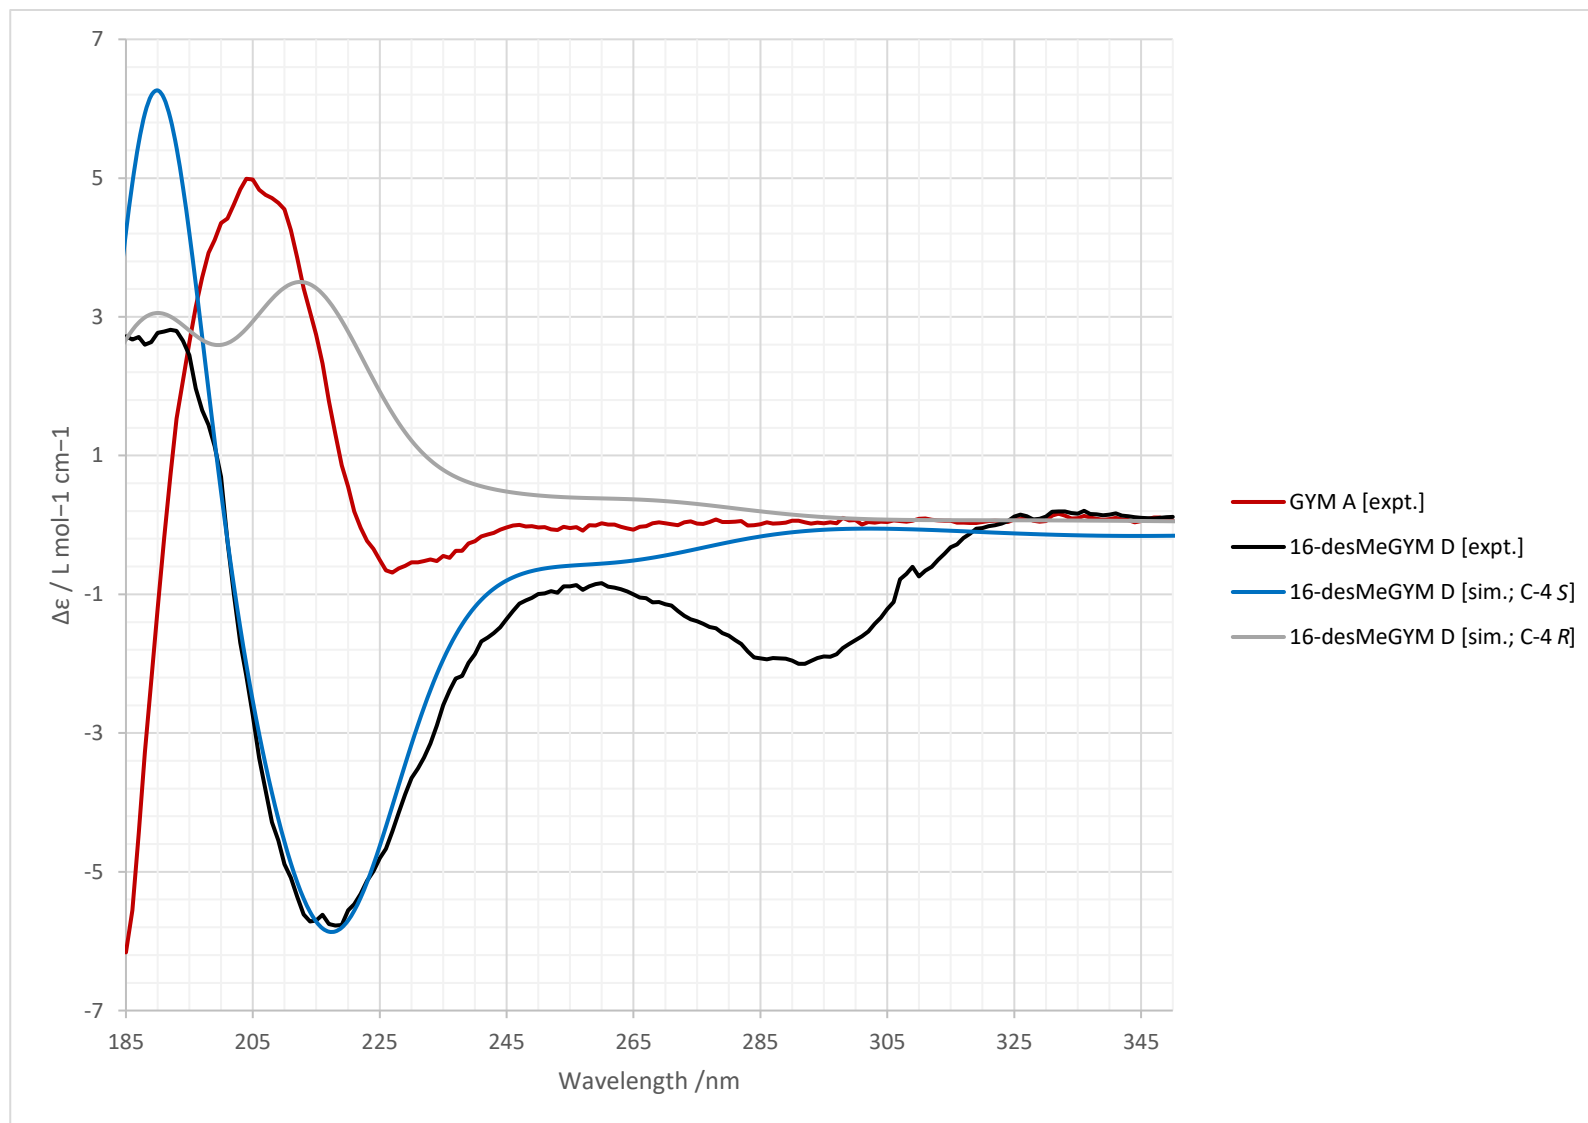

Figure S23: Measured (black) and simulated CD-spectra of 16-desmethyl GYM D (1) with *R* (grey) and *S* (blue) configuration at C-4 in comparison to the measured CD spectrum for GYM A (red).

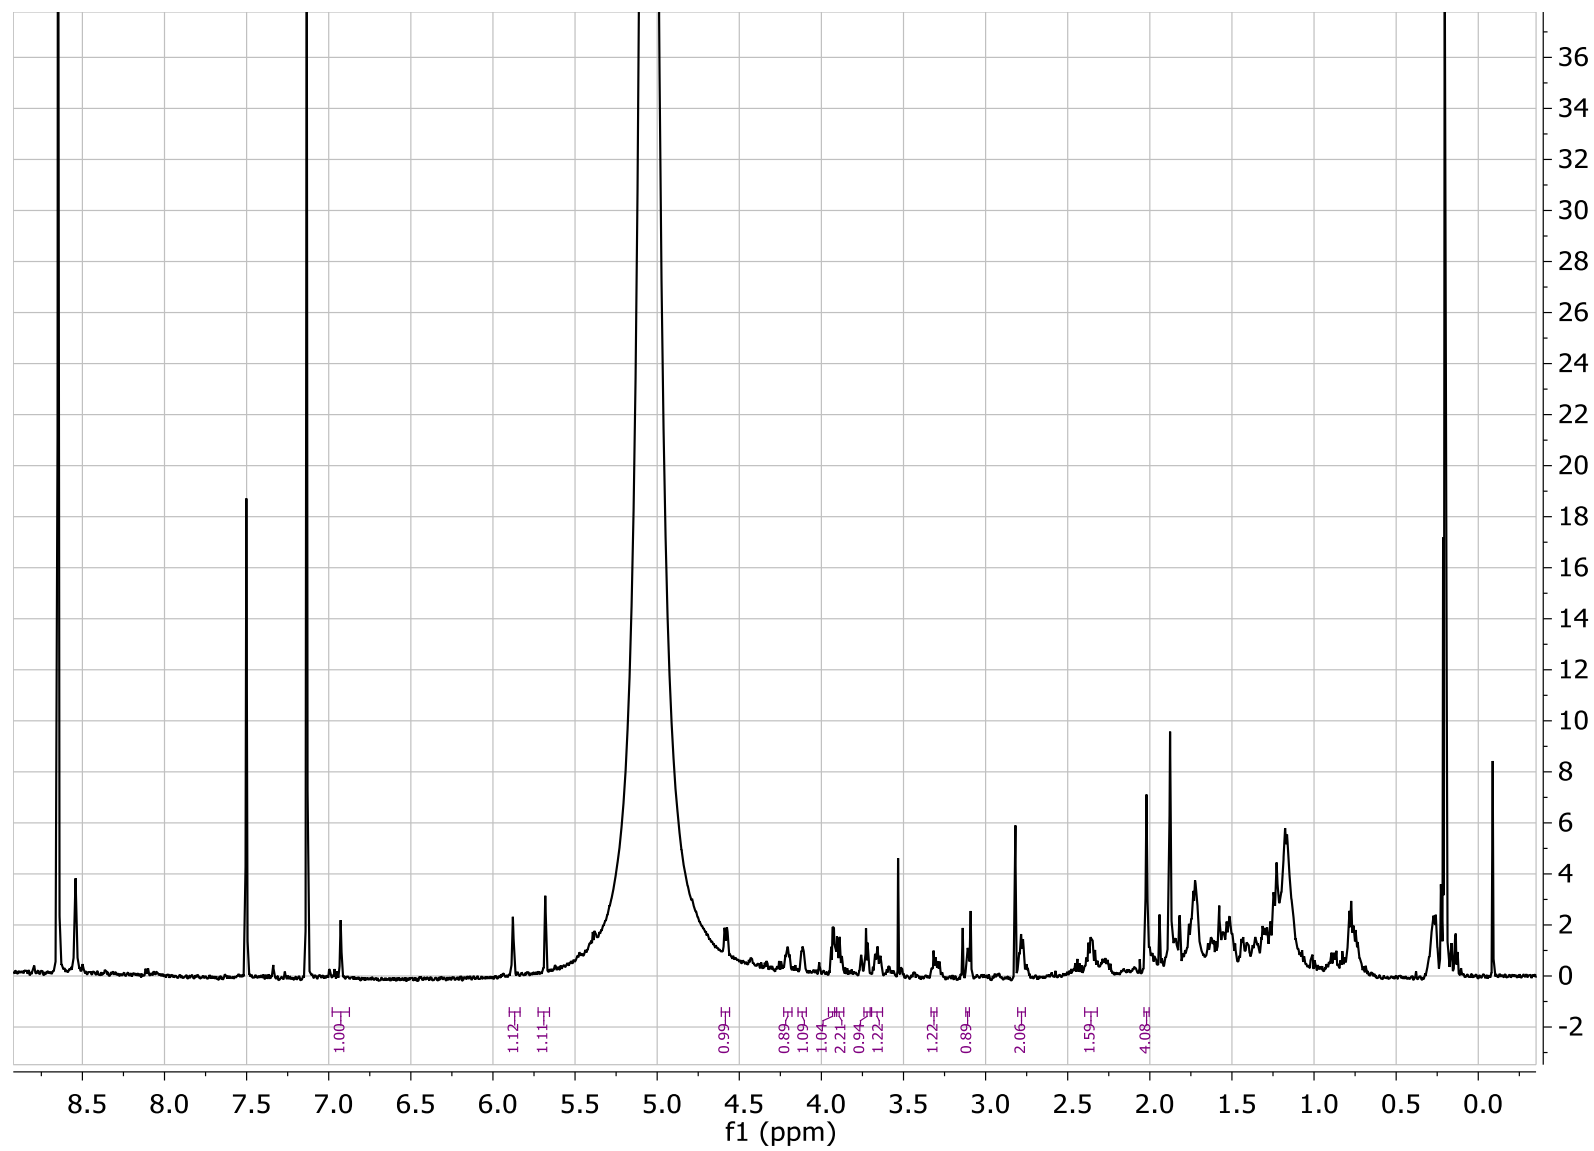

Figure S24: 1D Proton spectra of Gymnodimine E (600 MHz, pyridine-d<sub>5</sub>).

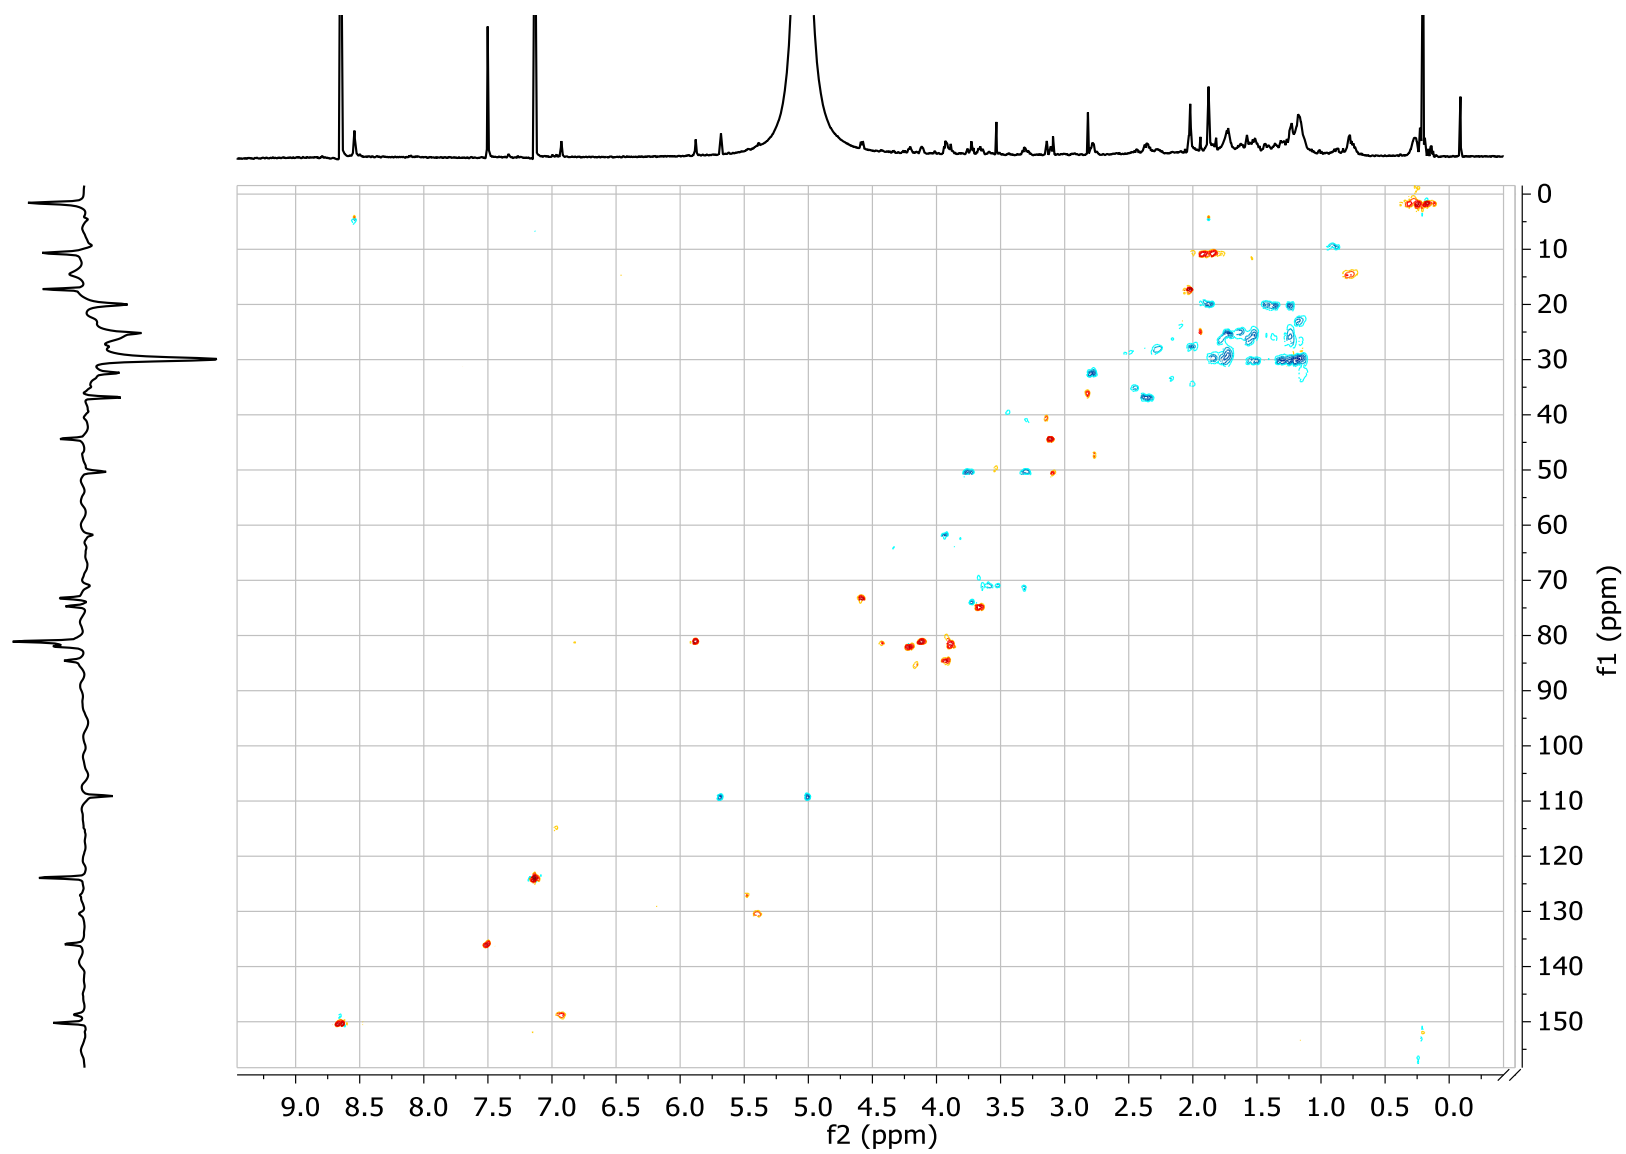

Figure S25: Multiplicity-edited 2D HSQC spectra of Gymnodimine E (600 MHz Proton frequency, pyridine-d<sub>5</sub>).

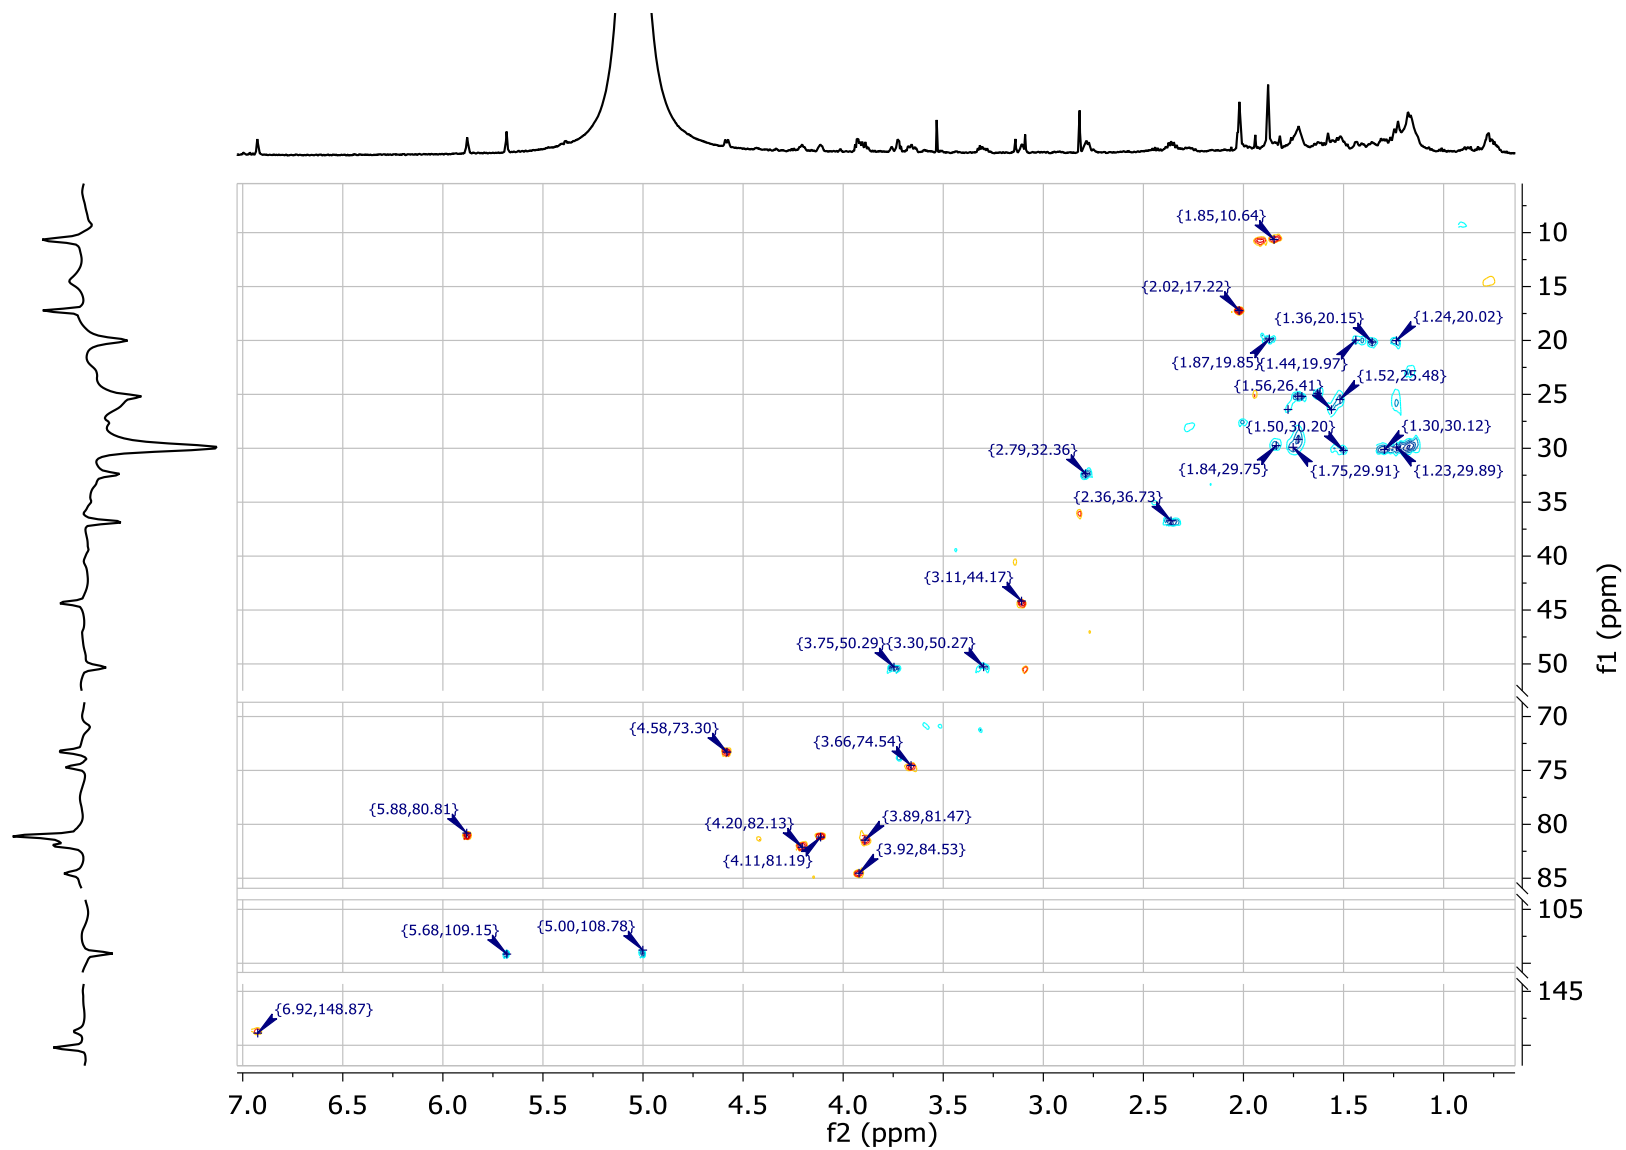

Figure S26: Slice 1 of Multiplicity-edited 2D HSQC spectra of Gymnodimine E (600 MHz Proton frequency, pyridine-d<sub>5</sub>).

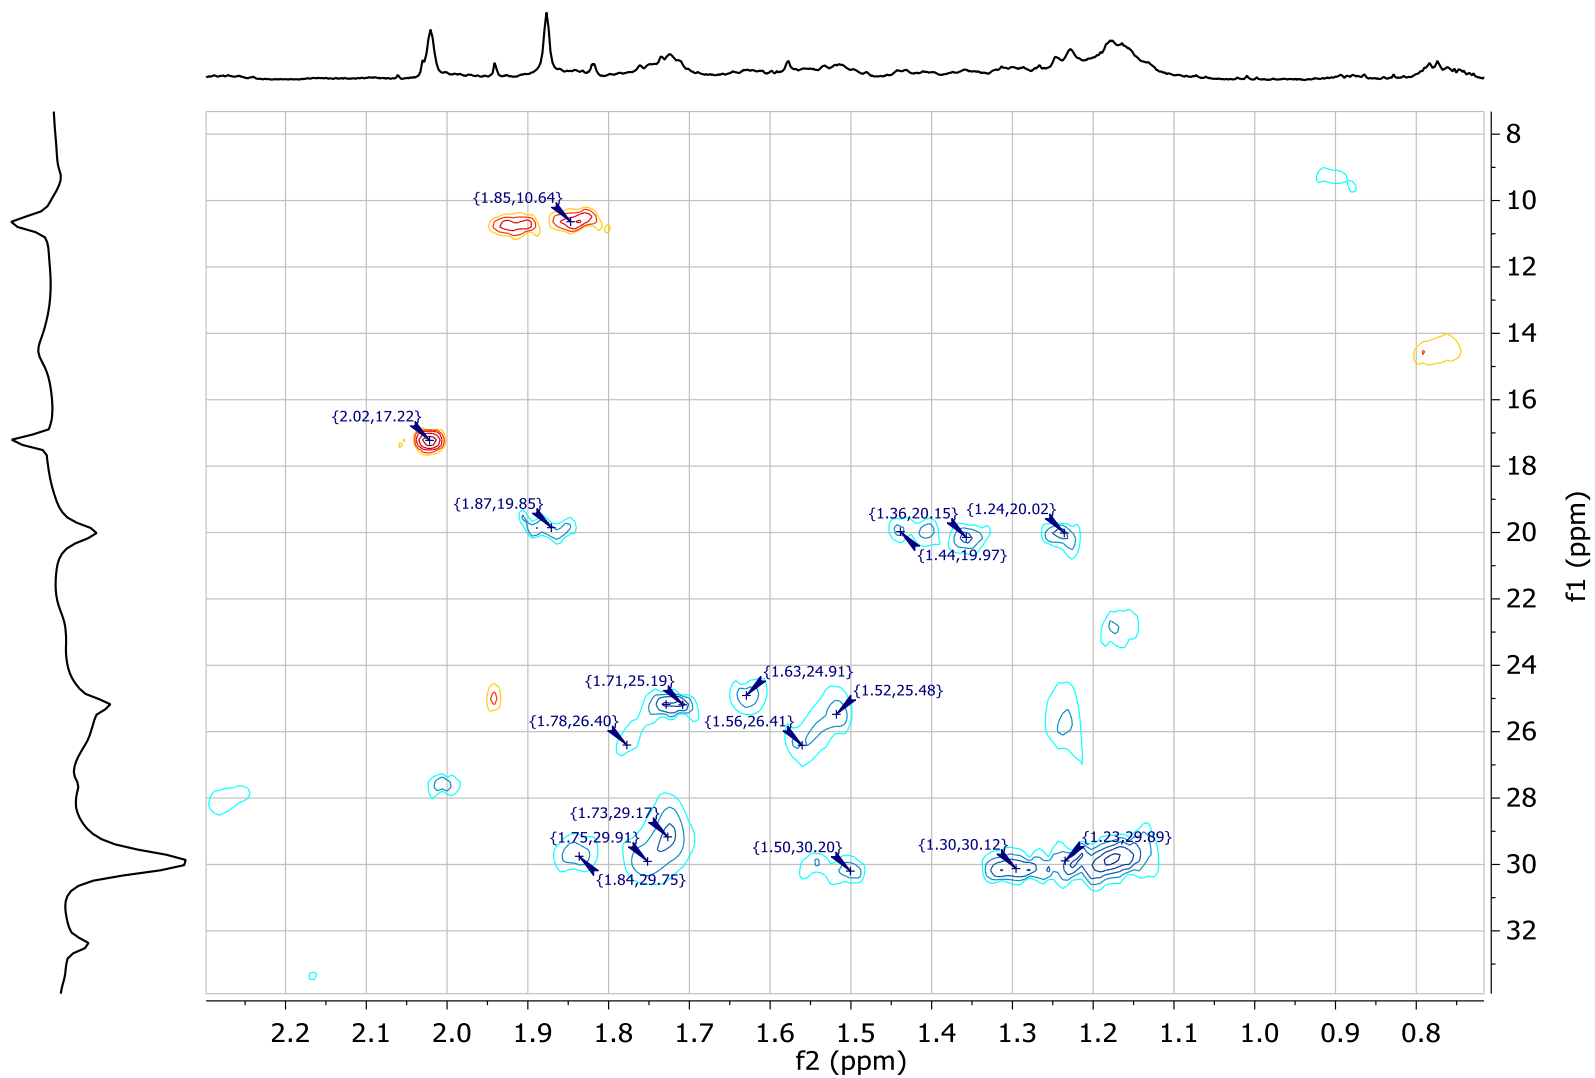

Figure S27: Slice 2 of Multiplicity-edited 2D HSQC spectra of Gymnodimine E (600 MHz Proton frequency, pyridine-d<sub>5</sub>).

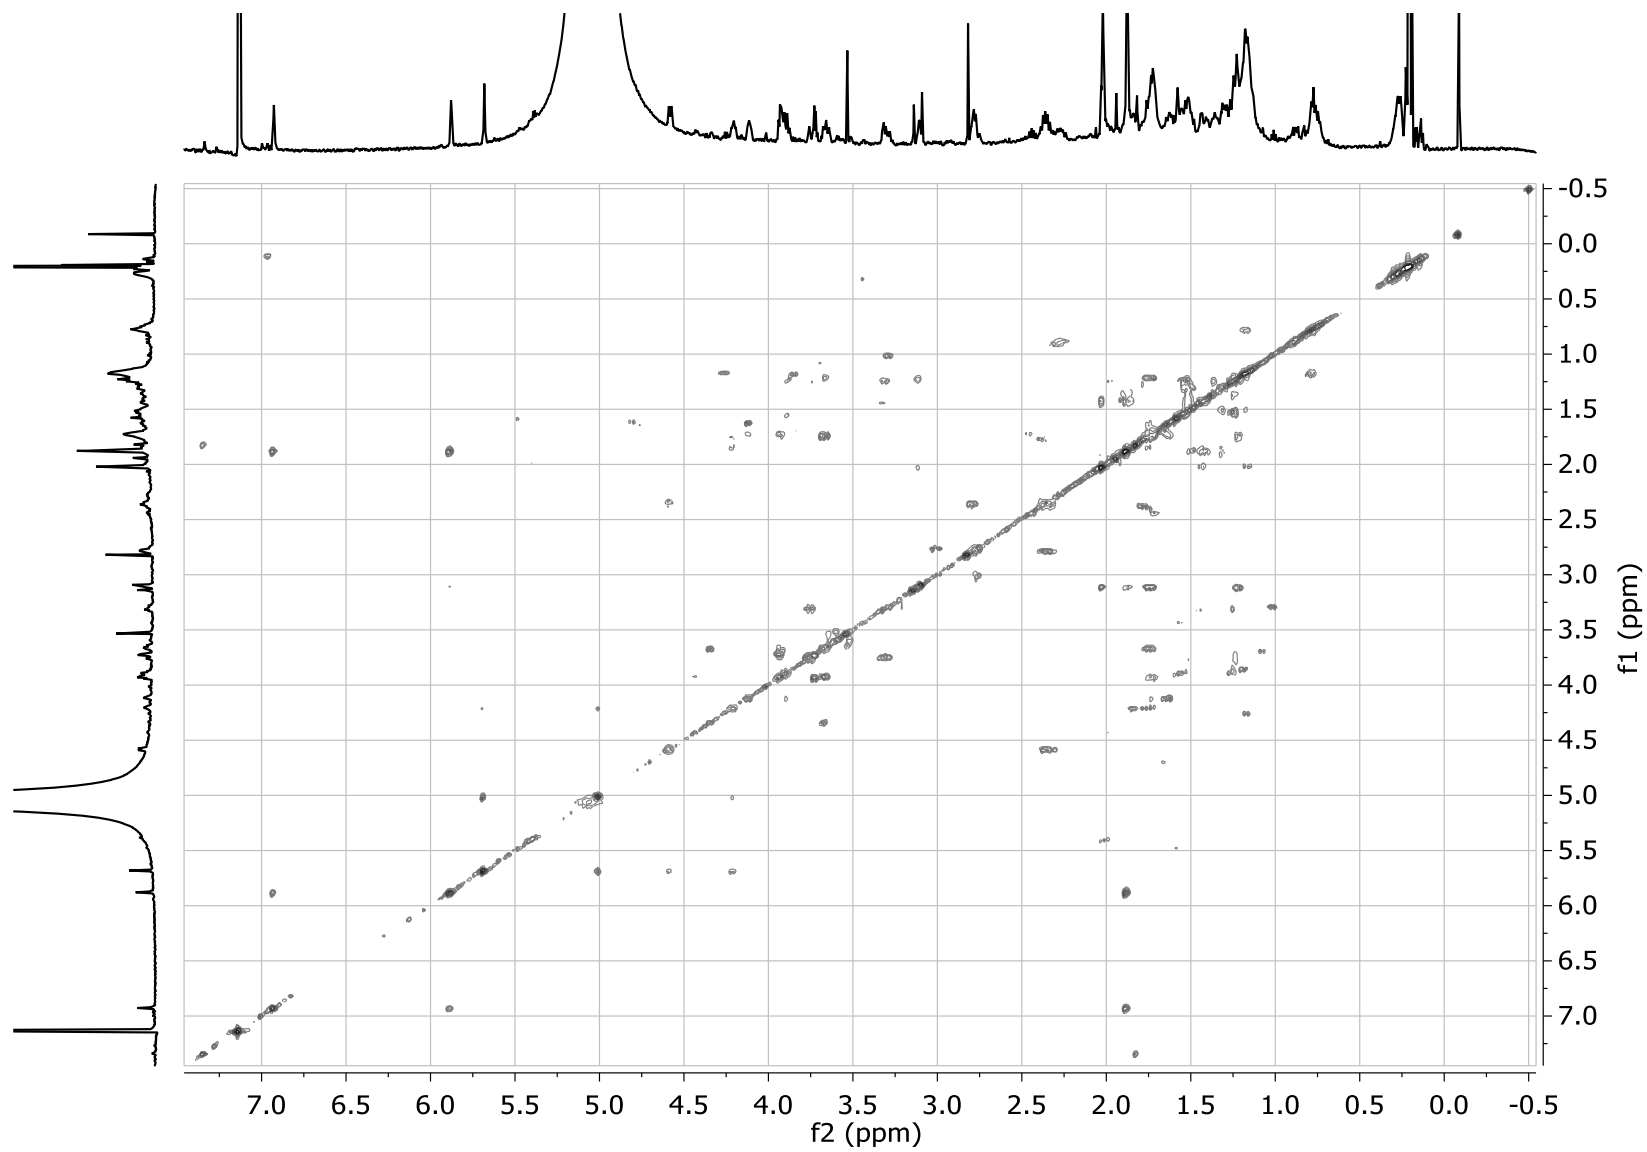

Figure S28: 2D COSY spectra of Gymnodimine E (600 MHz, pyridine-d<sub>5</sub>).

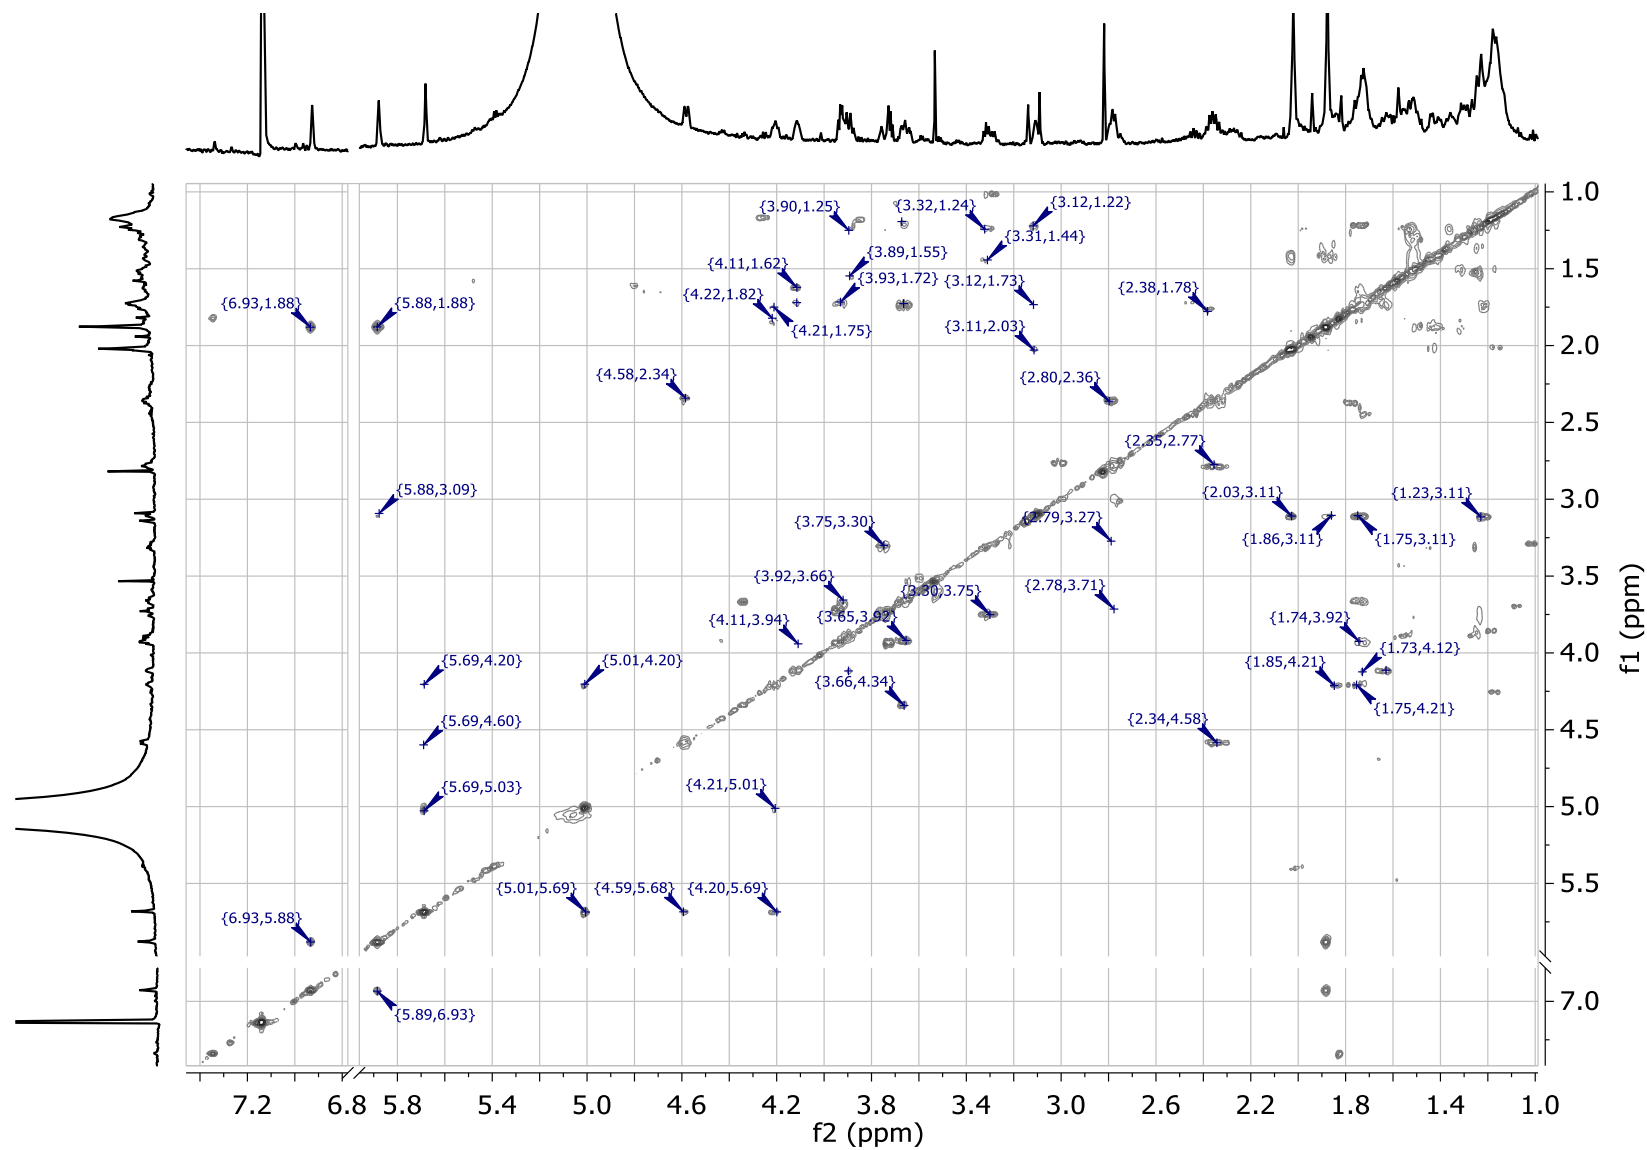

Figure S29: Slice of COSY spectra of Gymnodimine E (600 MHz Proton frequency, pyridine-d<sub>5</sub>).

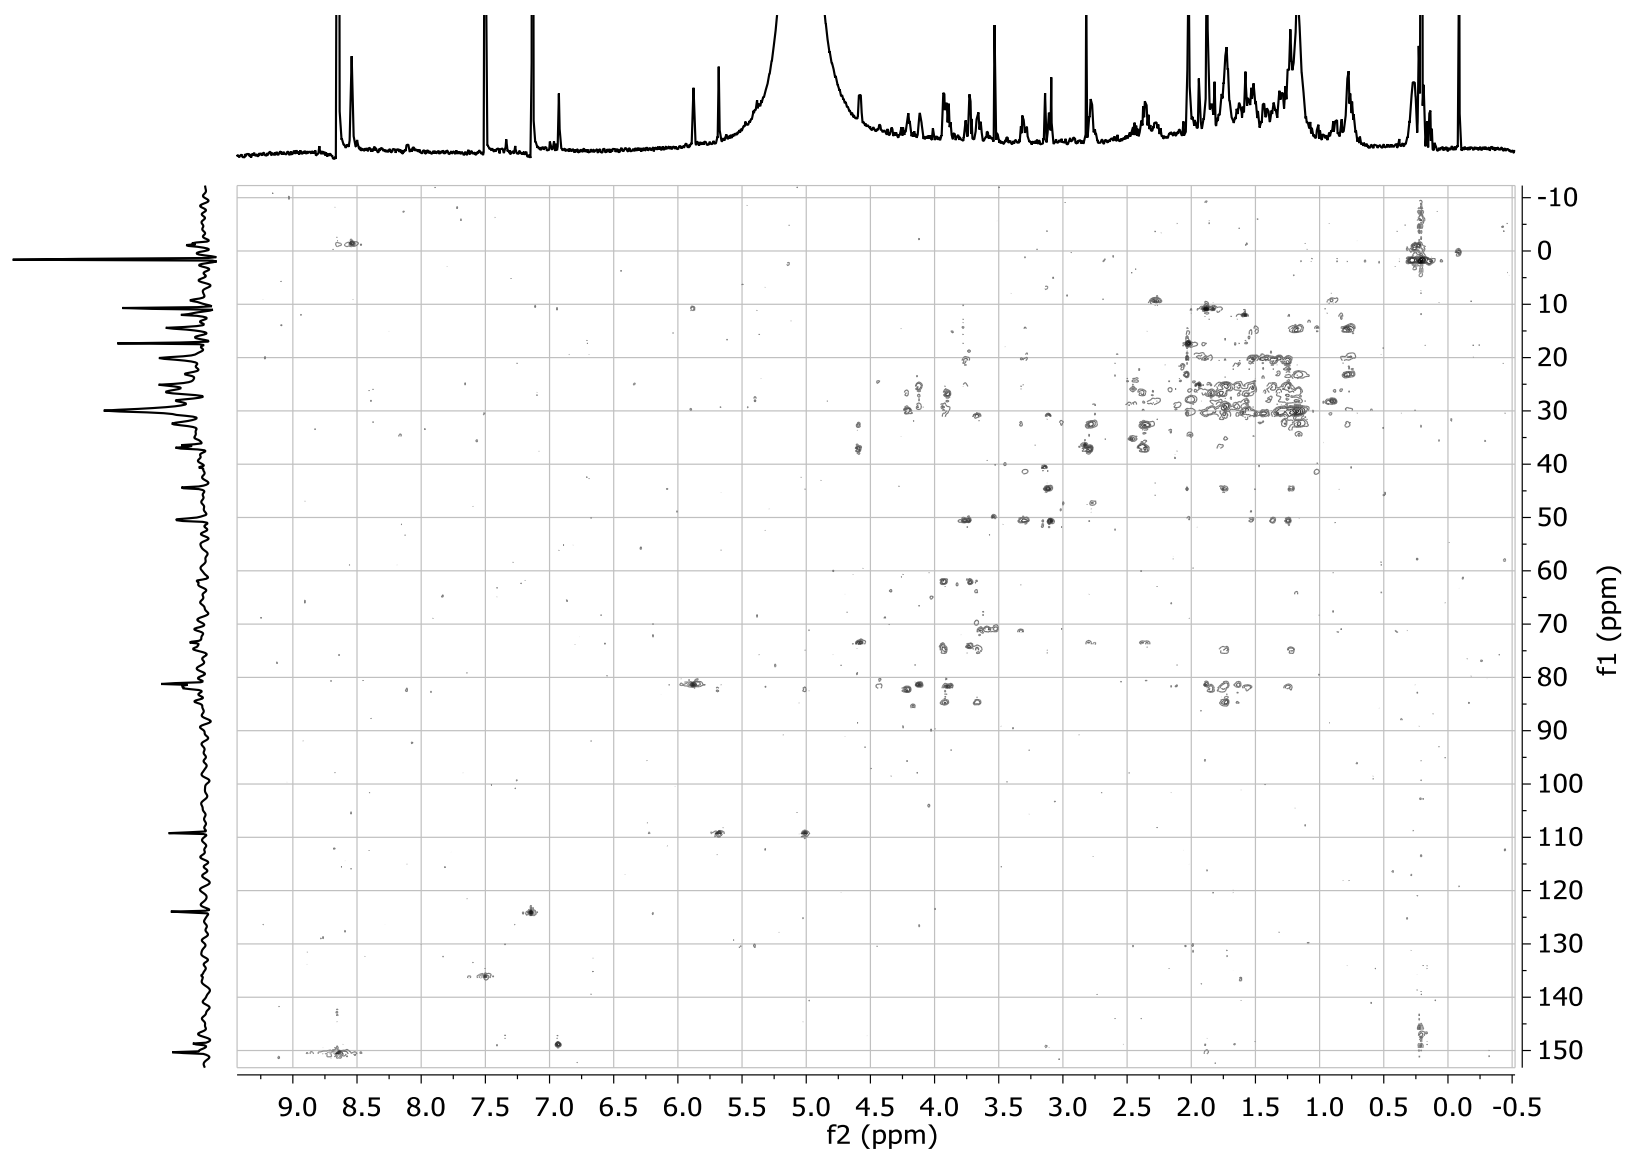

Figure S30: 2D HSQC-TOCSY spectra of Gymnodimine E (600 MHz Proton frequency, pyridine- $d_5$ ).



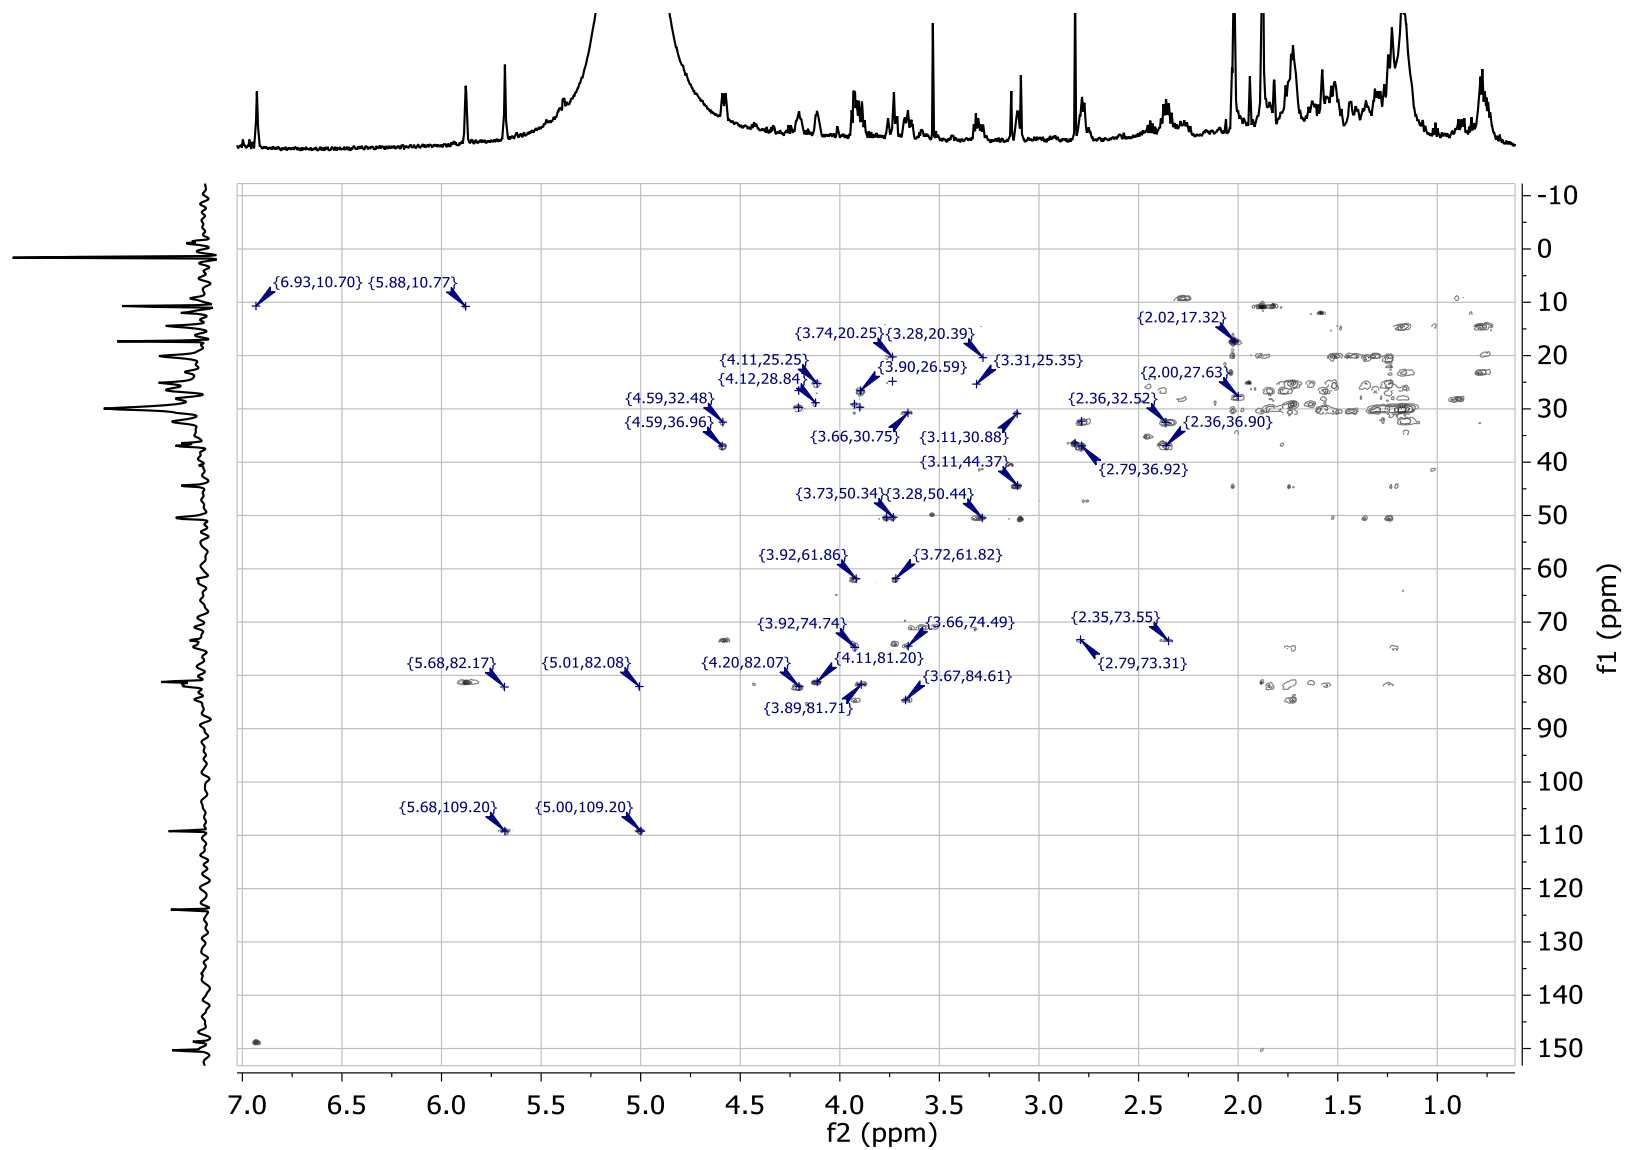

Figure S31: Slice of 2D HSQC-TOCSY spectra of Gymnodimine E (600 MHz Proton frequency, pyridine-d<sub>5</sub>).

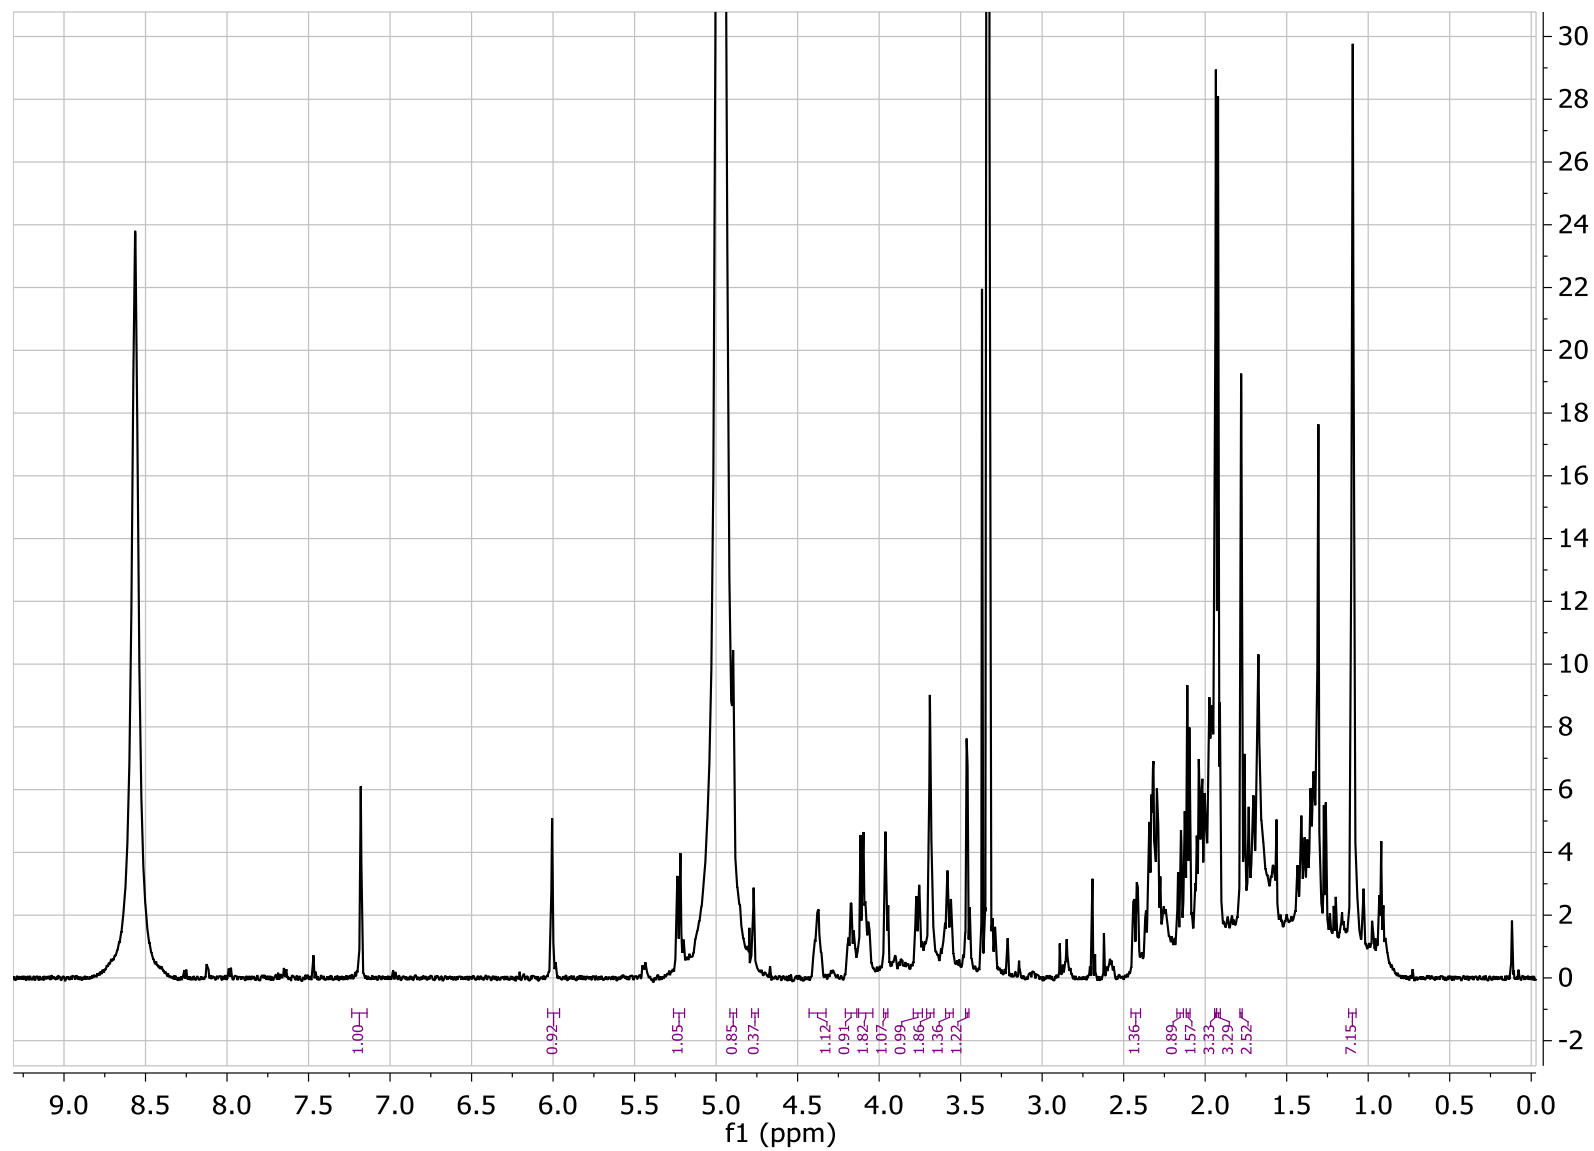

Figure S32: 1D Proton spectra of 20-Hydroxy-13,19-dimethyl-SPX C (600 MHz, CD<sub>3</sub>OD).

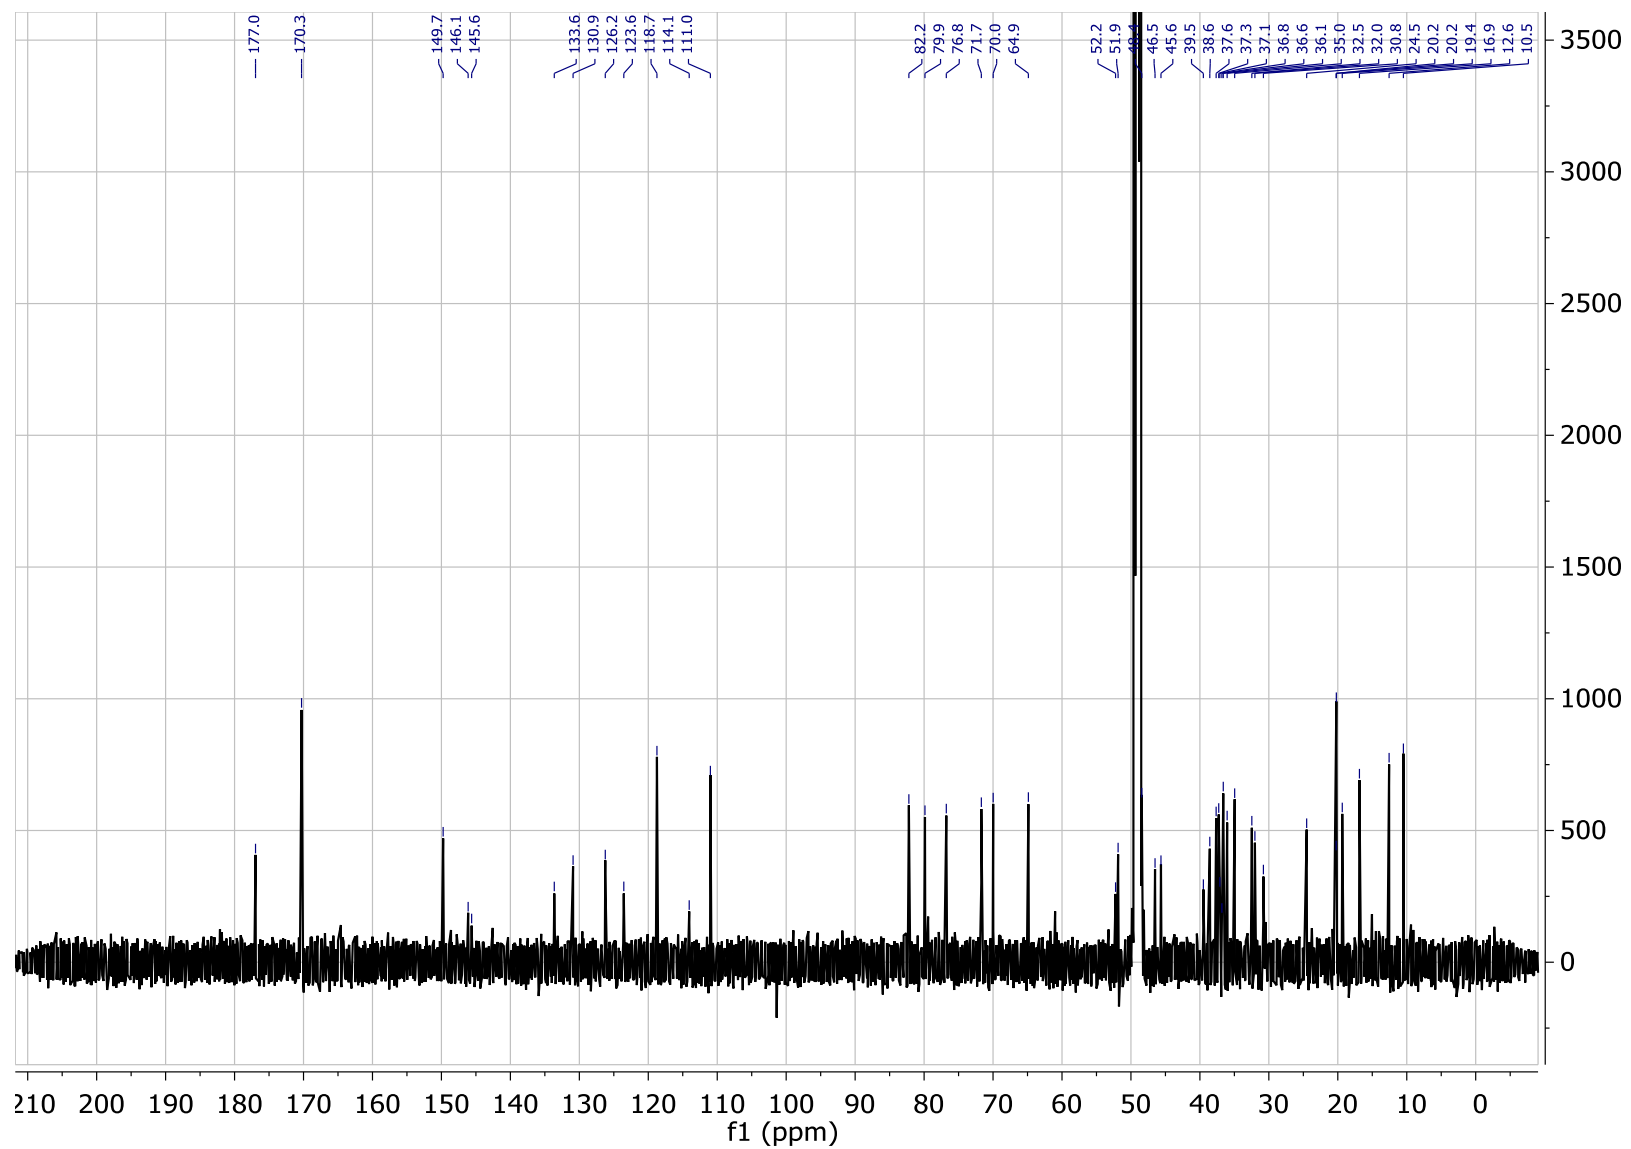

Figure S33: 1D  $^{13}\text{C}$ -spectra of 20-Hydroxy-13,19-didesMethyl-SPX C (150 MHz,  $\text{CD}_3\text{OD}$ ).

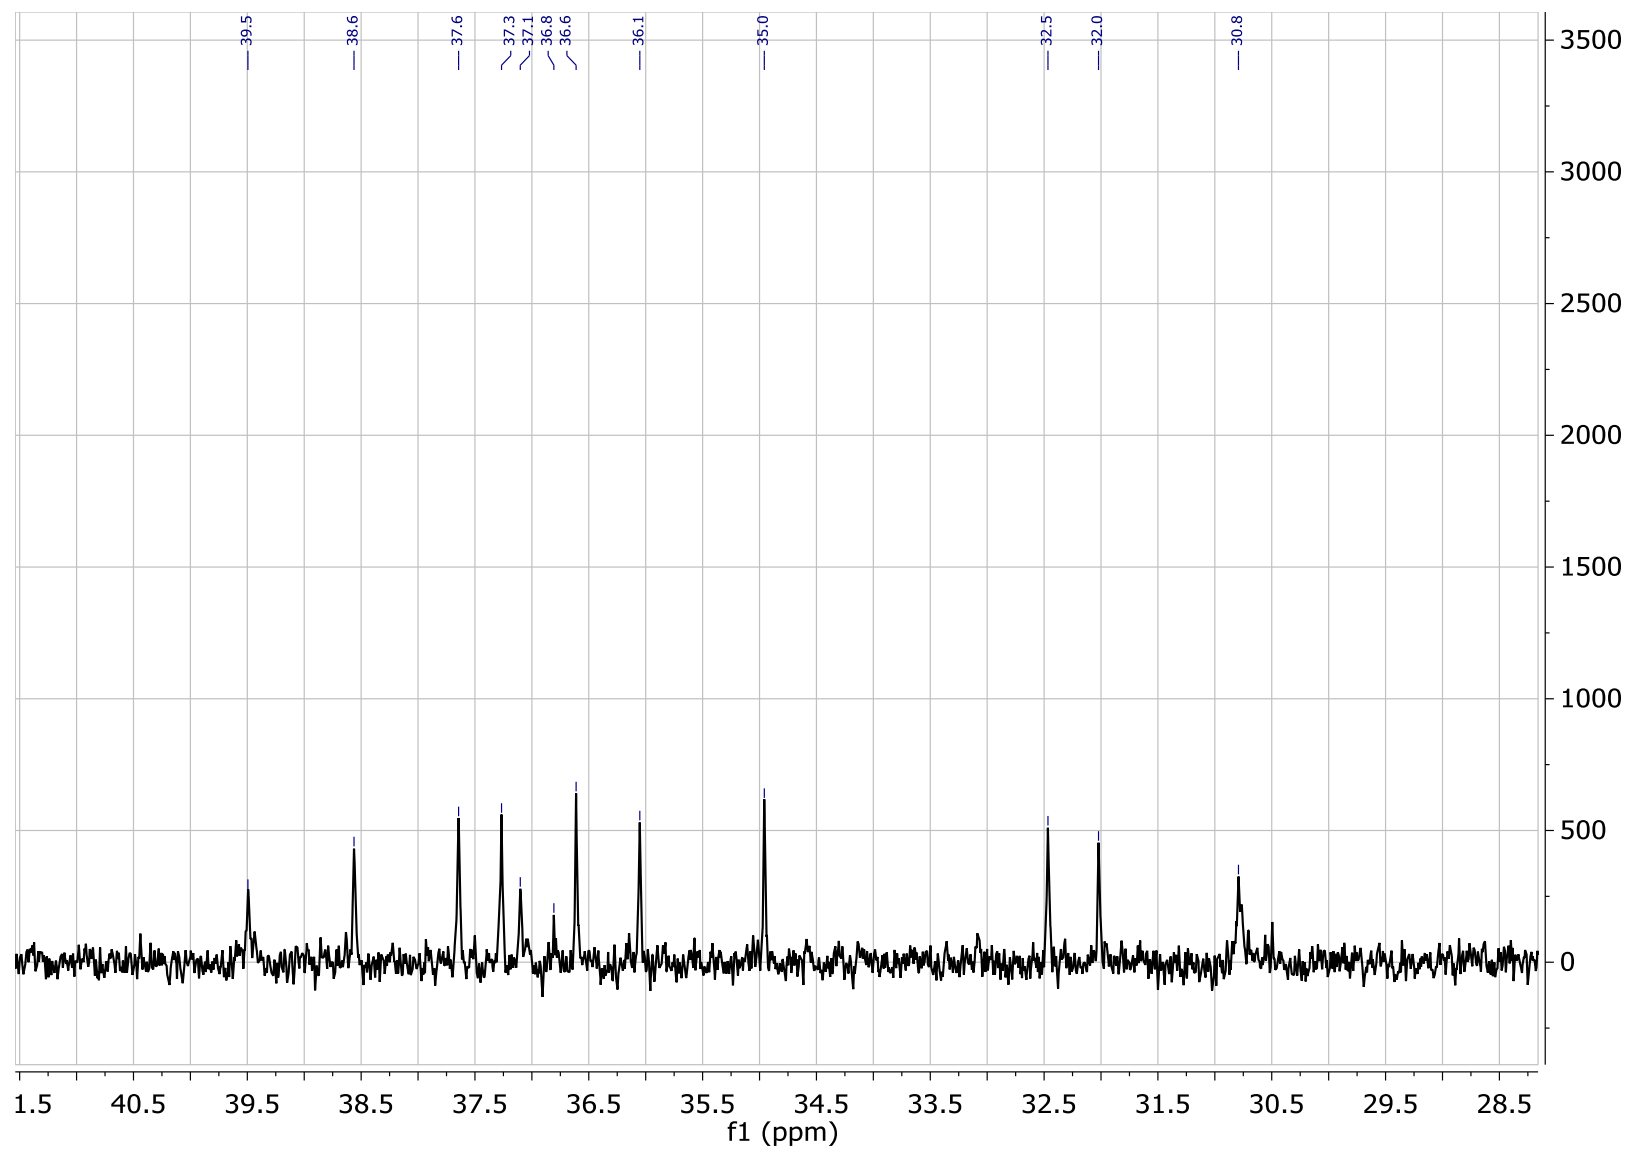

Figure S34: Slice of 1D <sup>13</sup>C-spectra of 20-Hydroxy-13,19-dimethyl-SPX C (150 MHz, CD<sub>3</sub>OD).

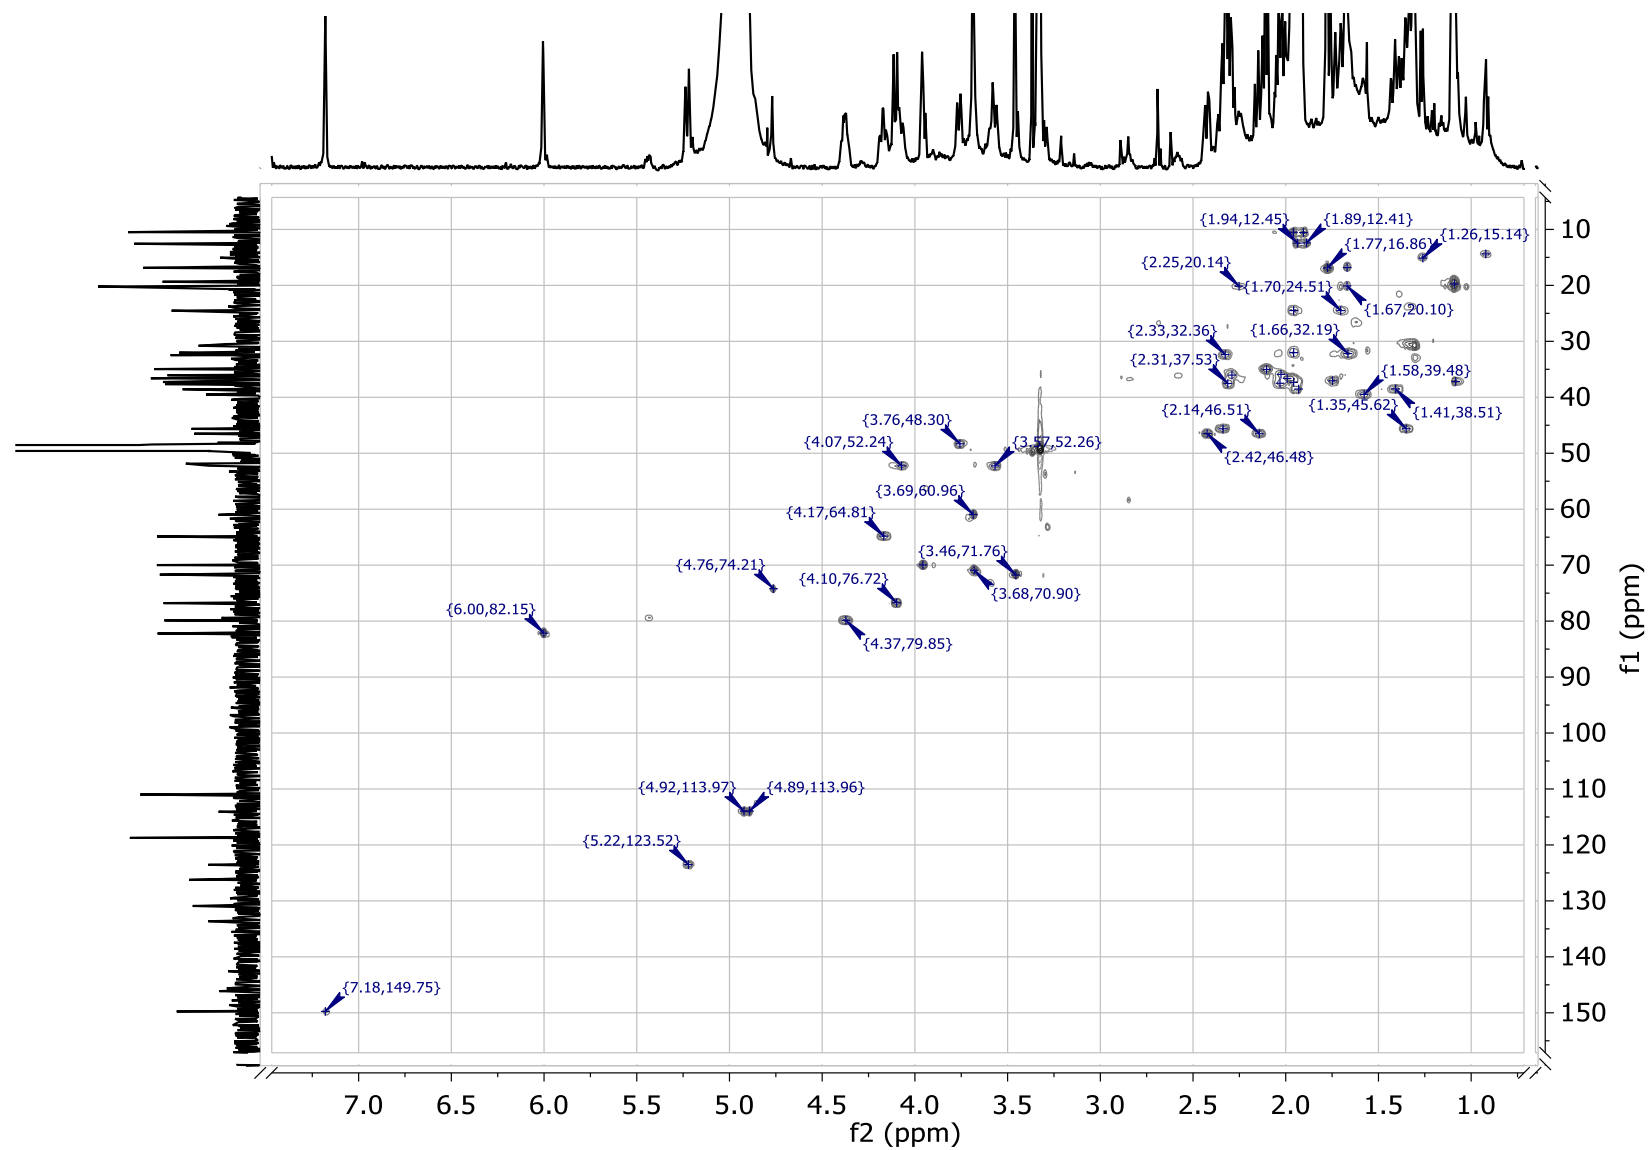

Figure S35: 2D HSQC spectra of 20-Hydroxy-13,19-dimethyl-SPX C (600 MHz Proton frequency, CD<sub>3</sub>OD).

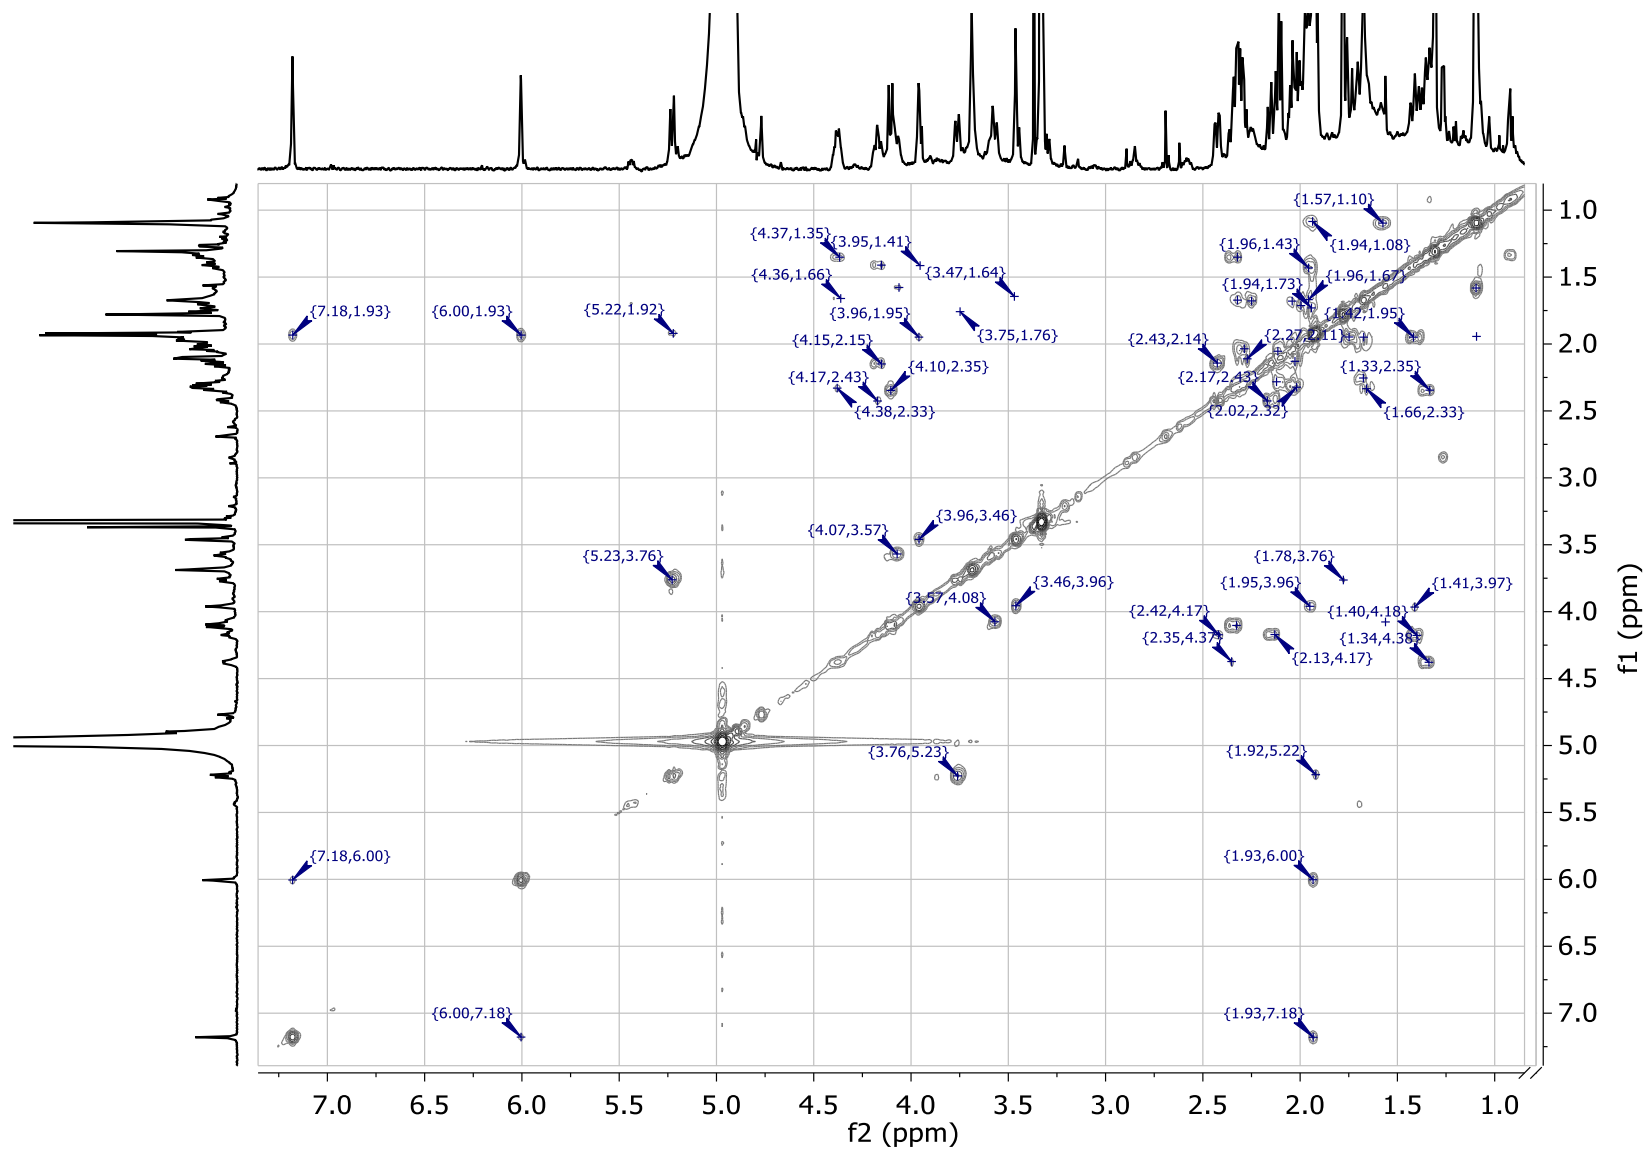

Figure S36: COSY spectra of 20-Hydroxy-13,19-didesMethyl-SPX C (600 MHz Proton frequency, CD<sub>3</sub>OD).

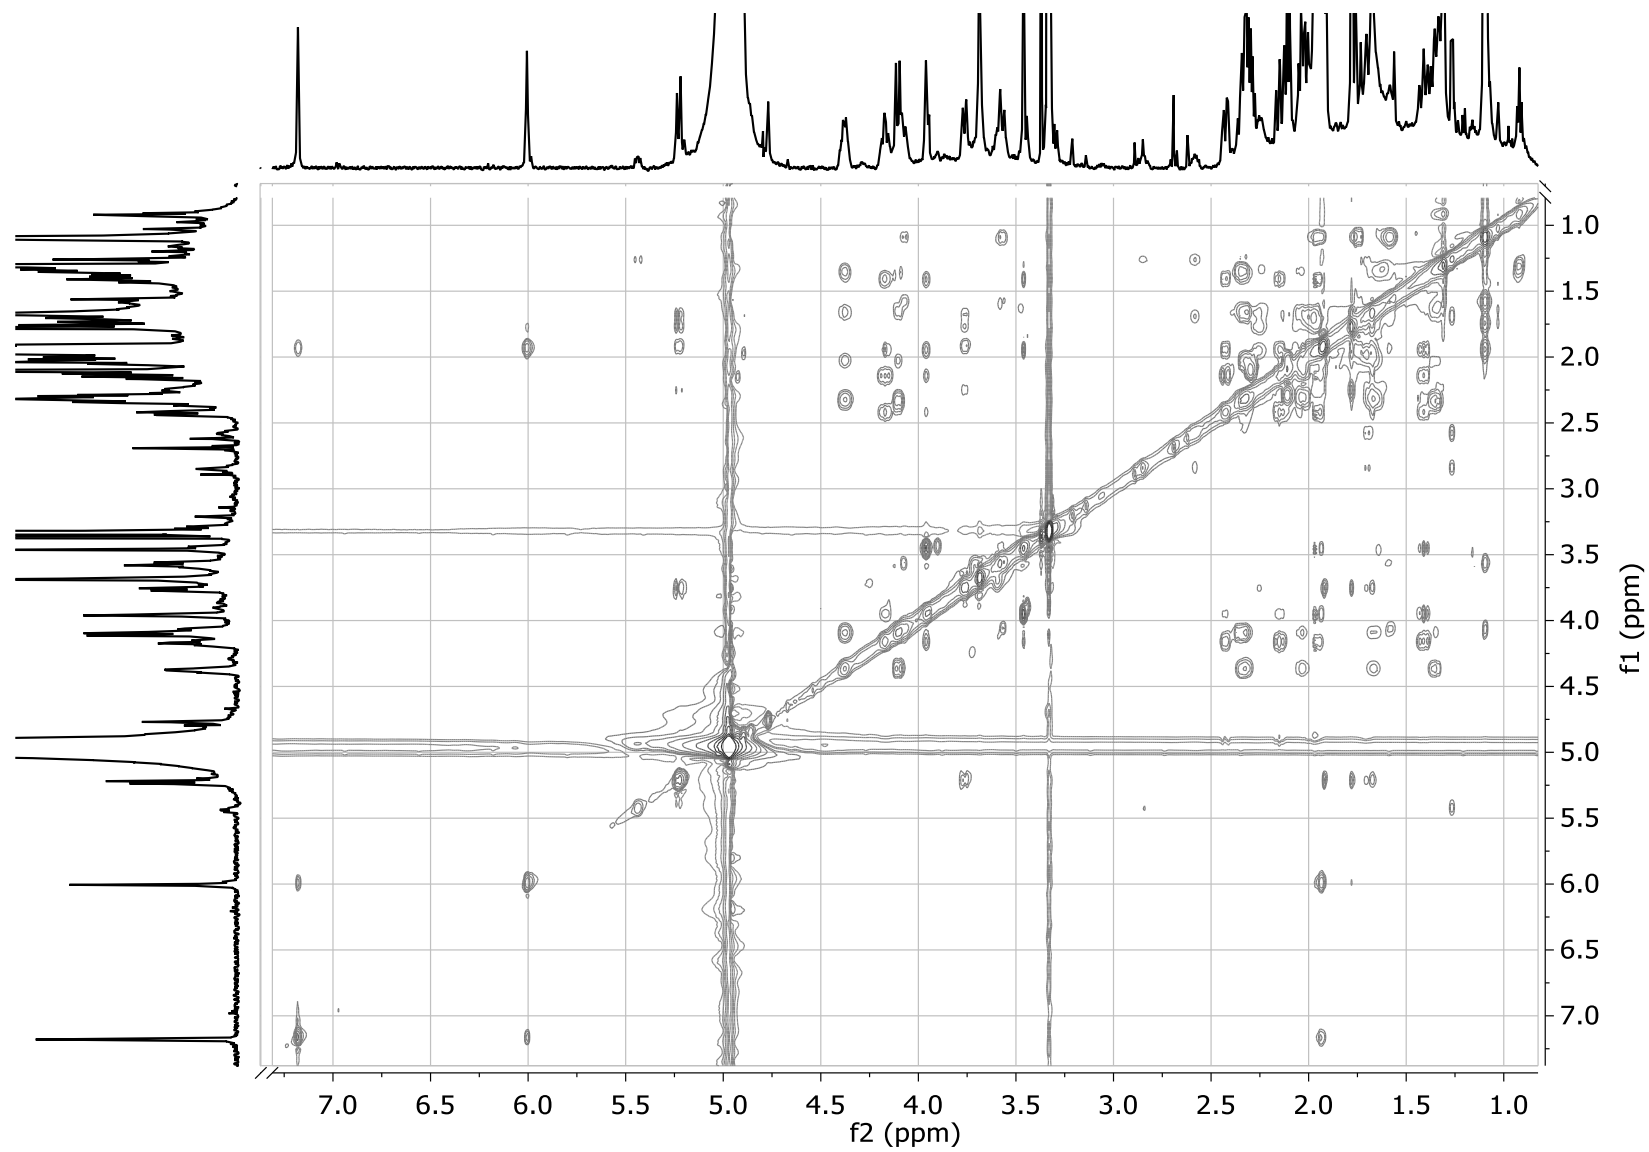

Figure S37: 2D TOCSY spectra of 20-Hydroxy-13,19-dimethyl-SPX C (600 MHz, CD<sub>3</sub>OD).

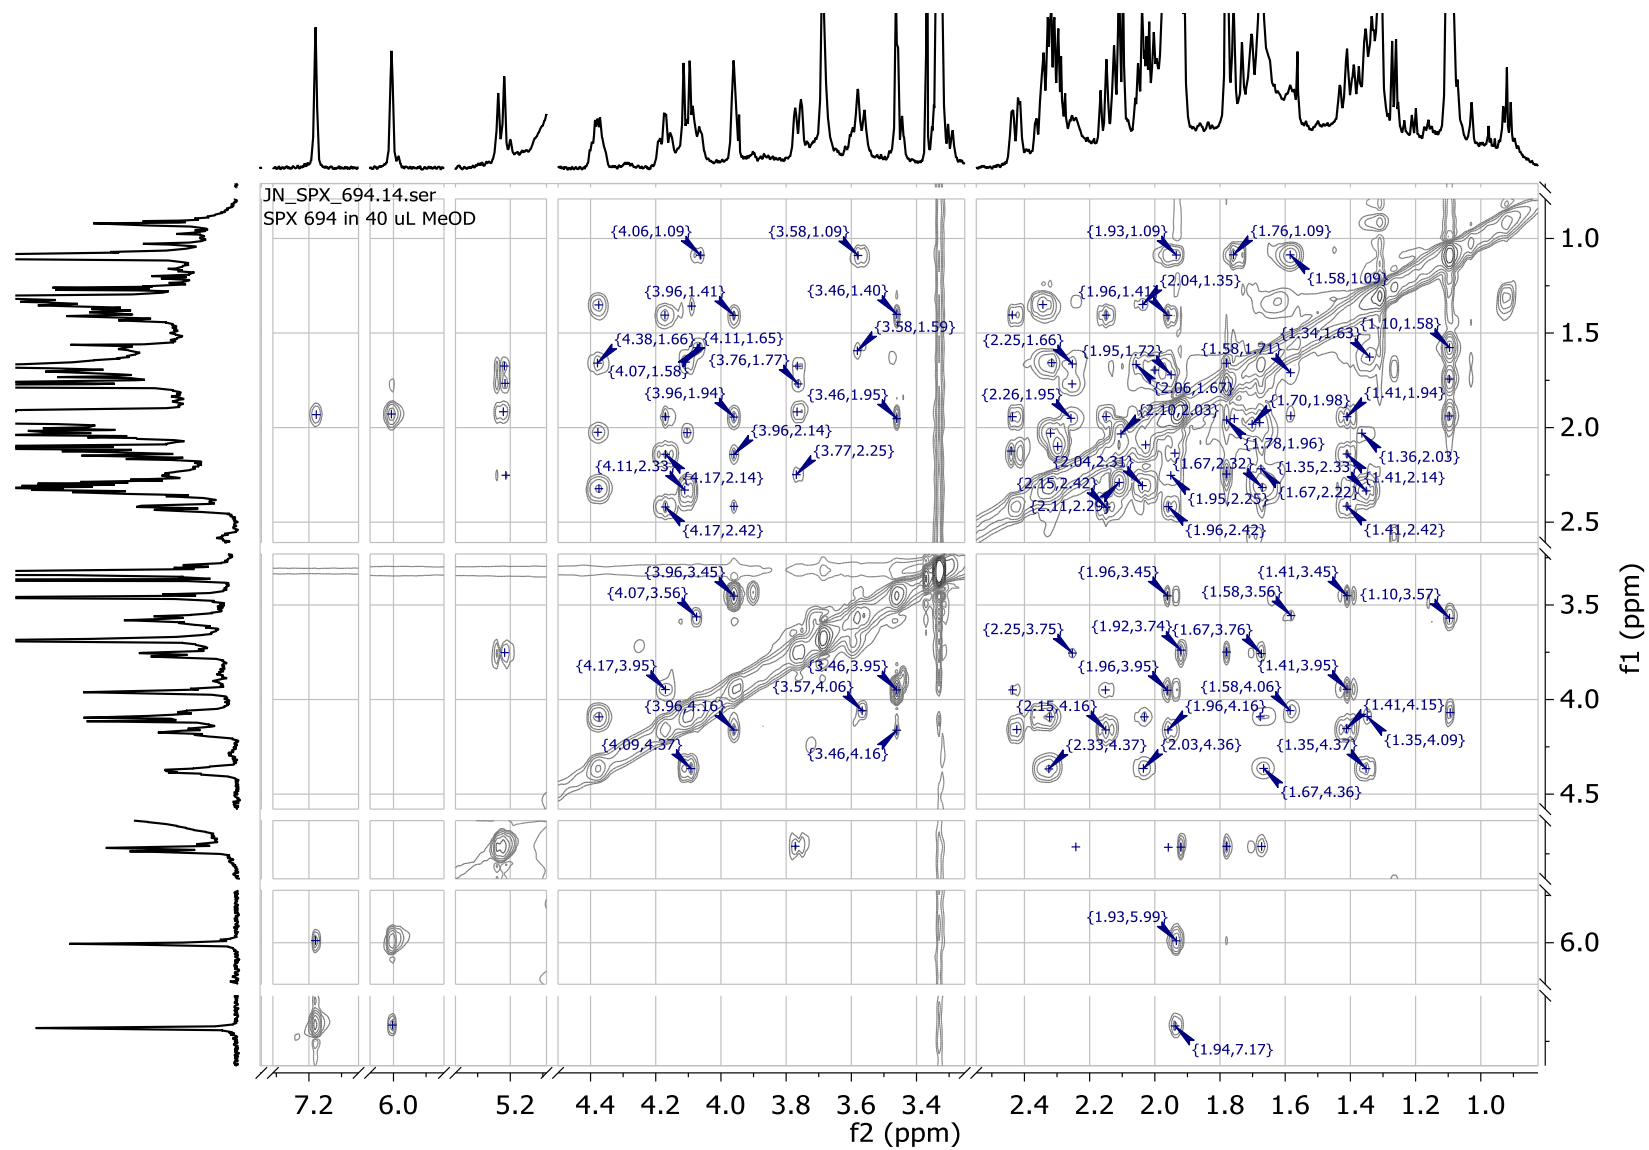

Figure S38: Slice of 2D TOCSY spectra of 20-Hydroxy-13,19-didesMethyl-SPX C (600 MHz, CD<sub>3</sub>OD).



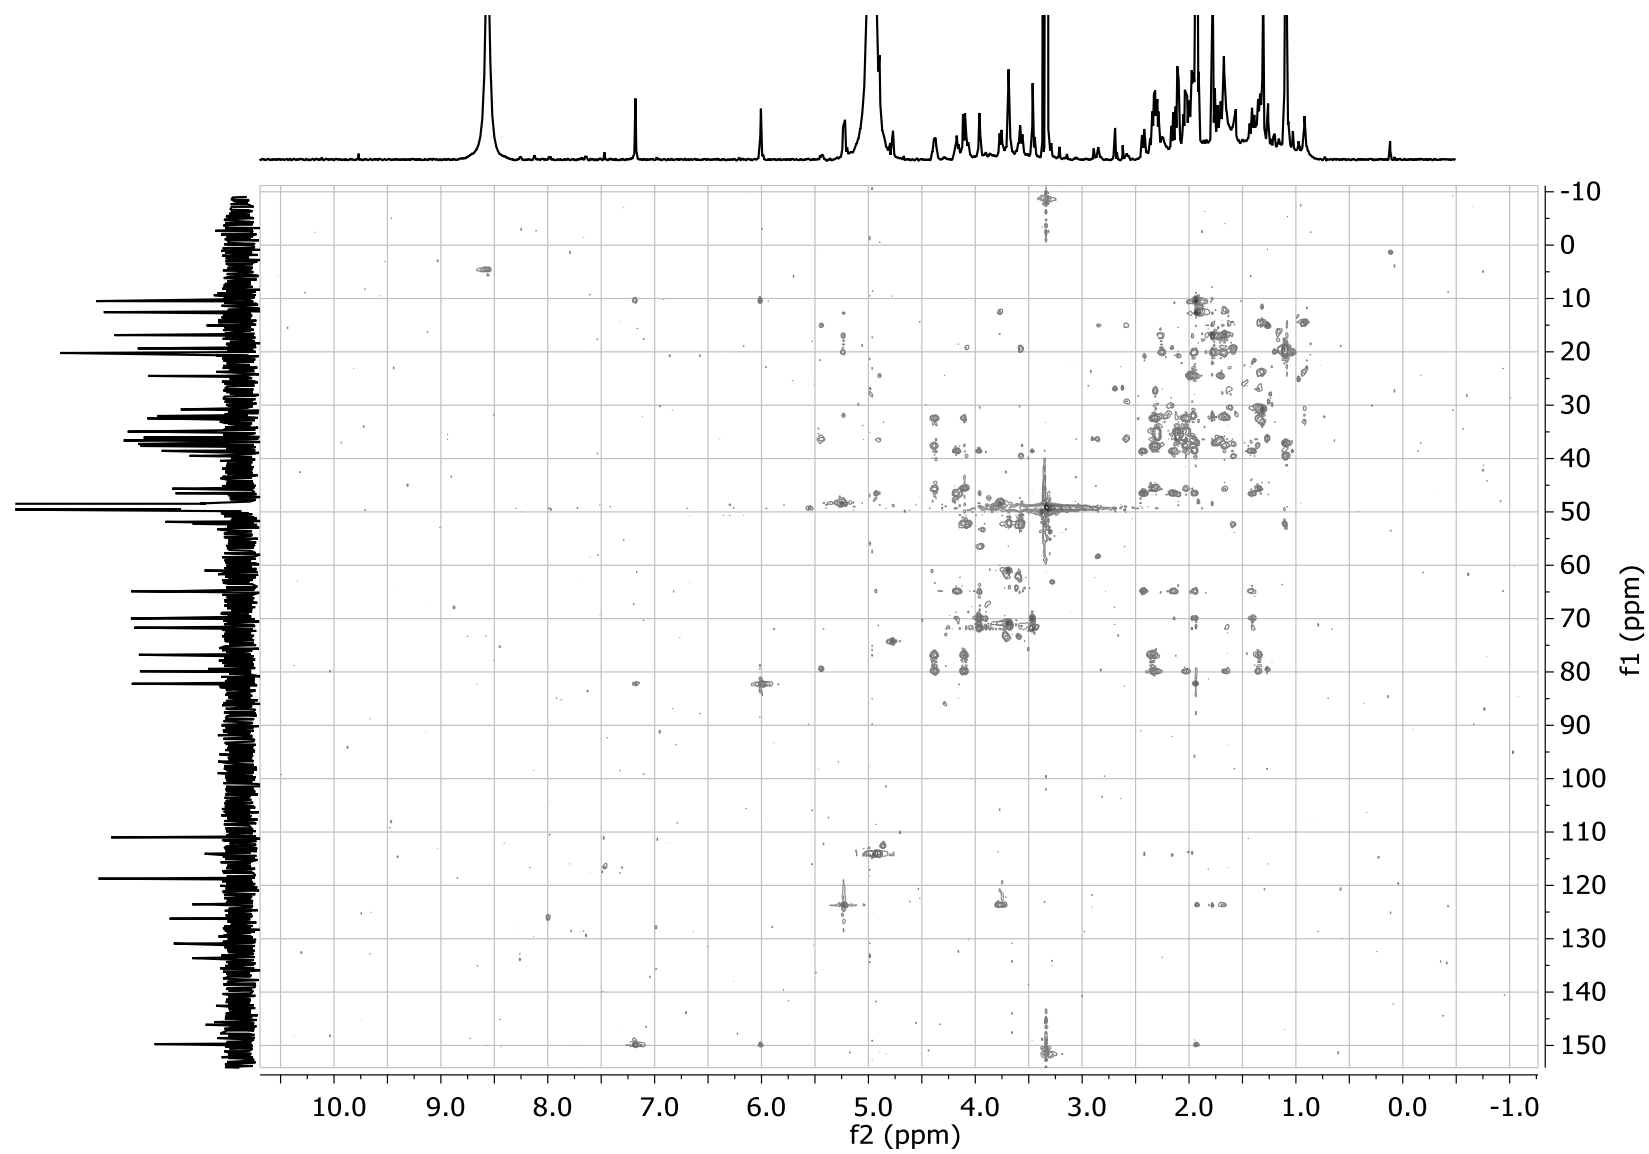

Figure S39: HSQC-TOCSY spectra of 20-Hydroxy-13,19-dimethyl-SPX C (600 MHz Proton frequency, CD<sub>3</sub>OD).

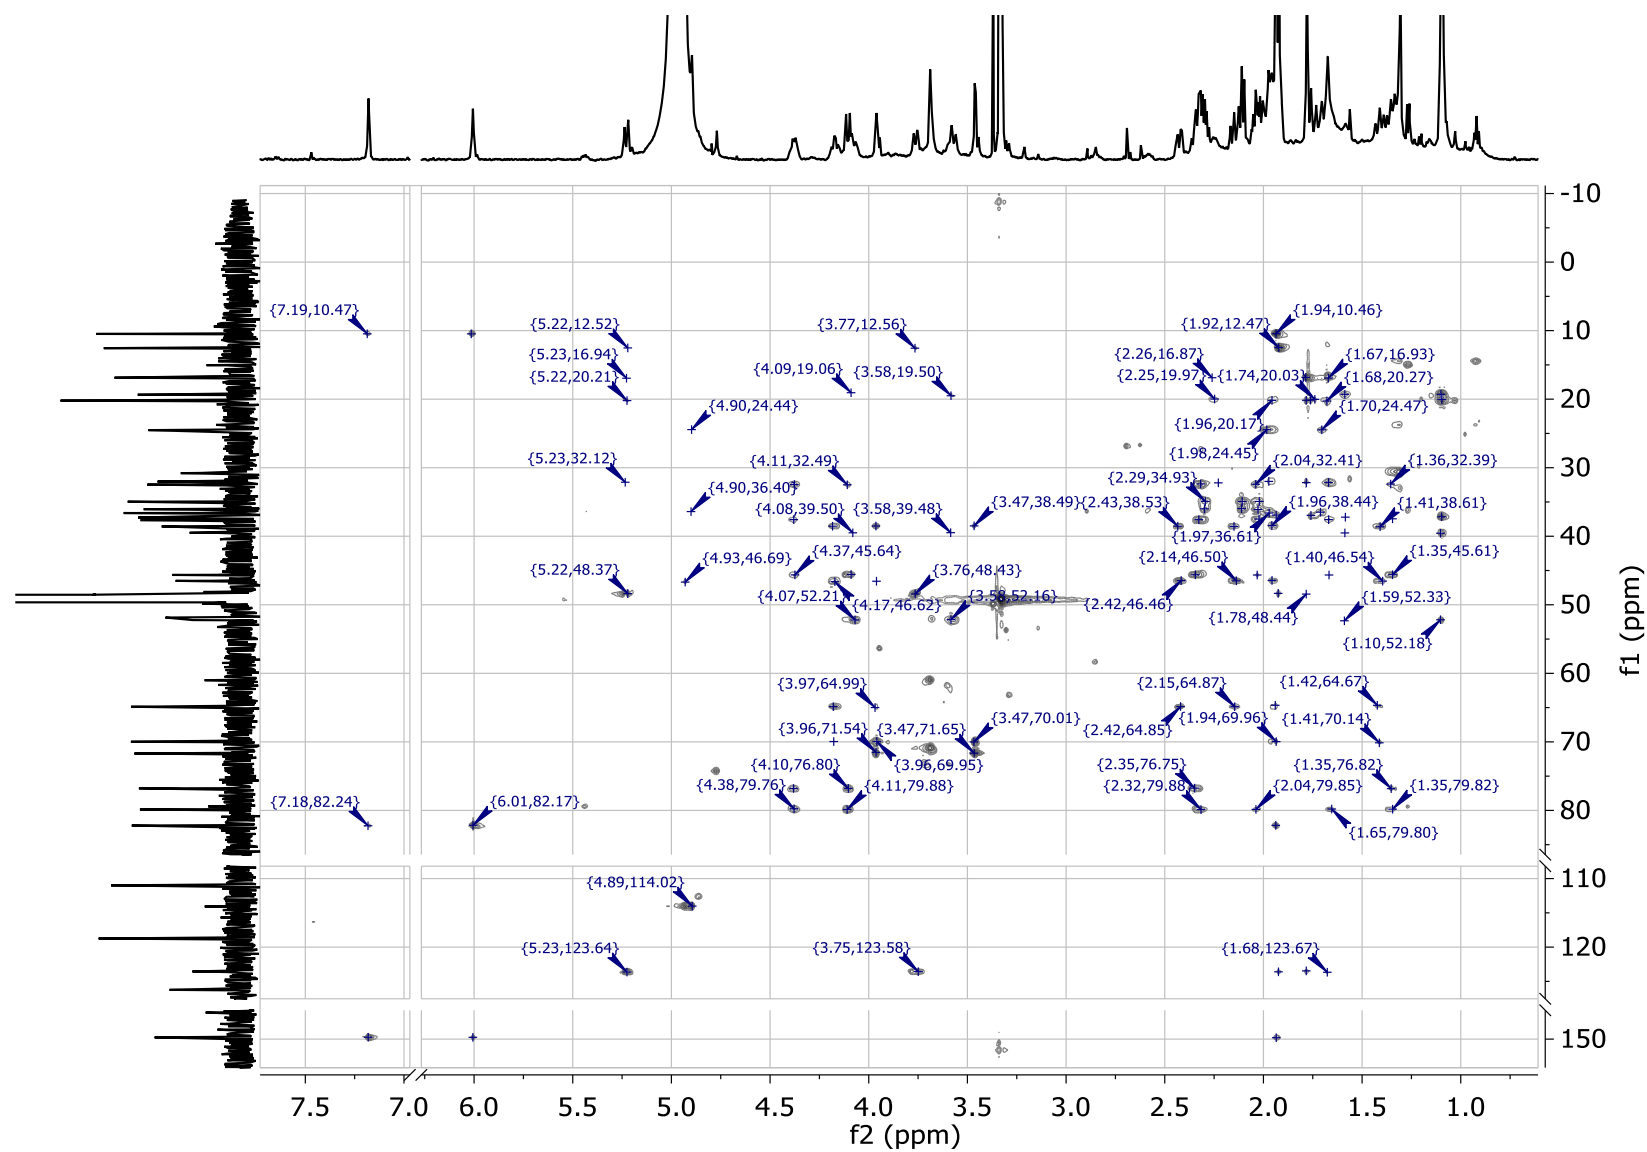

Figure S40: Slice of HSQC-TOCSY spectra of 20-Hydroxy-13,19-didesMethyl-SPX C (600 MHz Proton frequency,  $\text{CD}_3\text{OD}$ ).

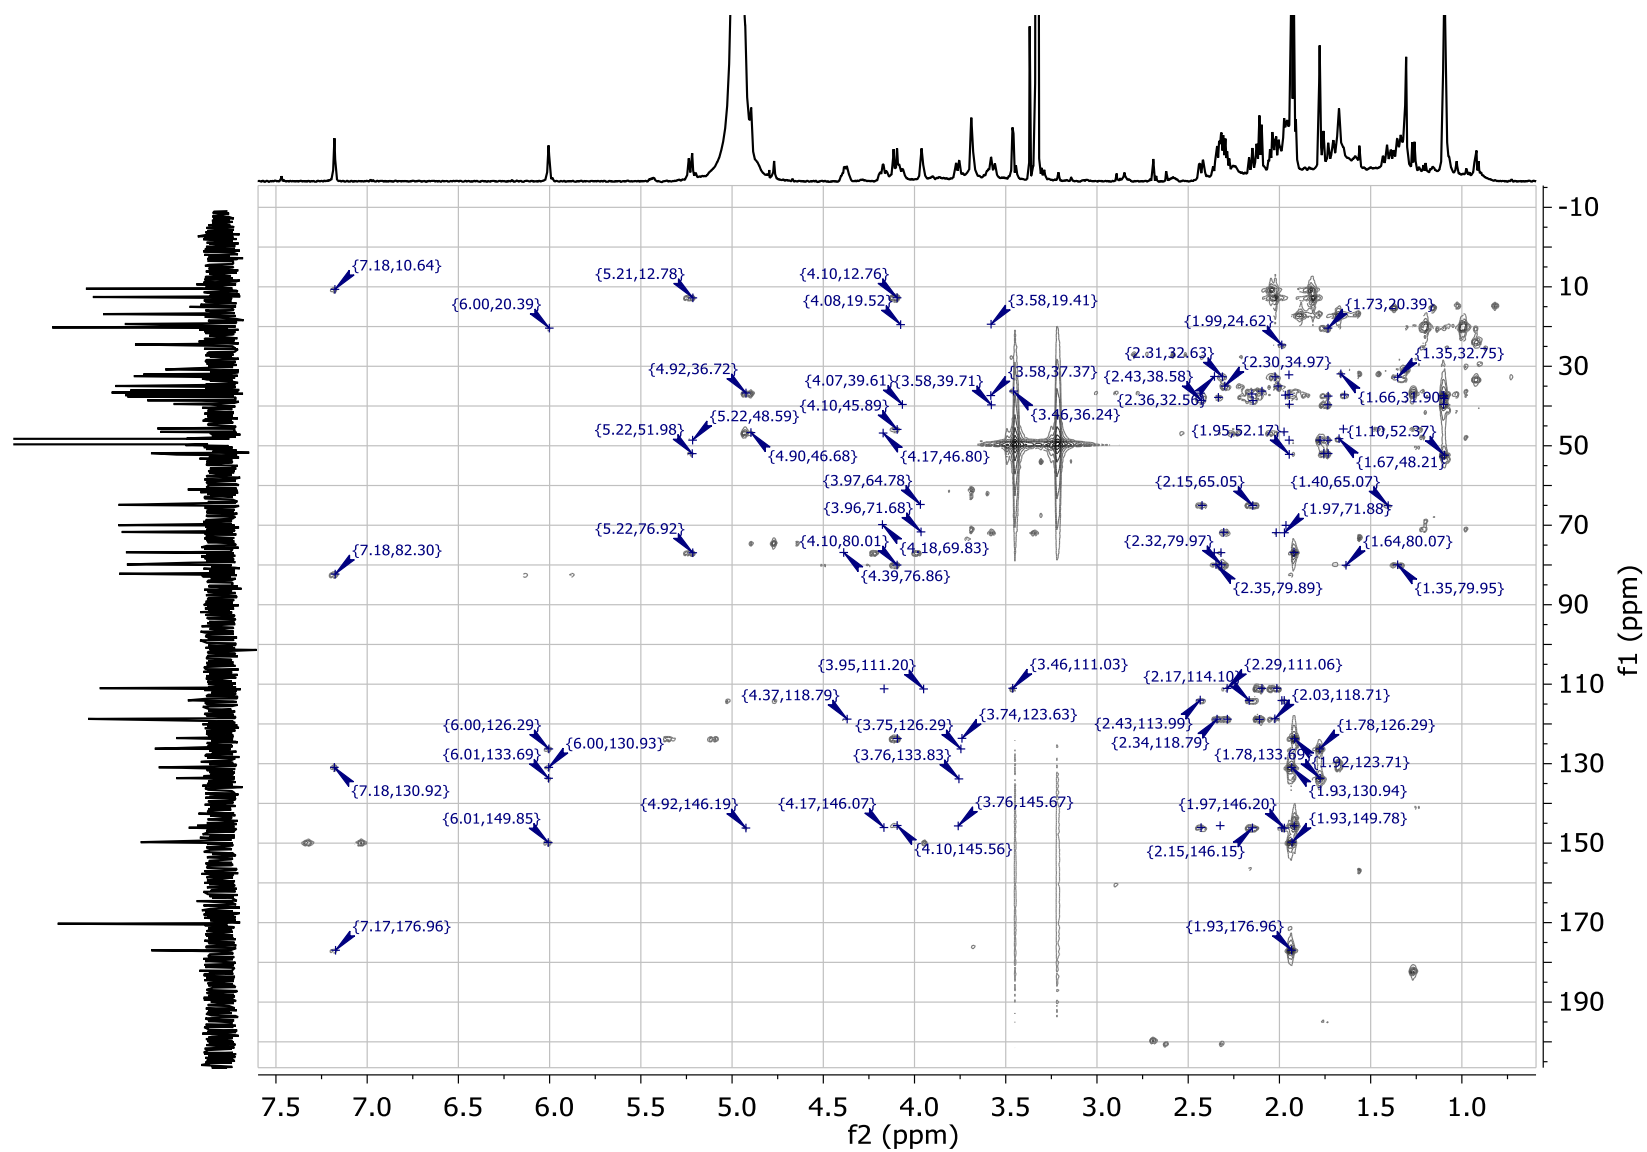

Figure S41: HMBC spectra of 20-Hydroxy-13,19-didesMethyl-SPX C (600 MHz Proton frequency, CD<sub>3</sub>OD).

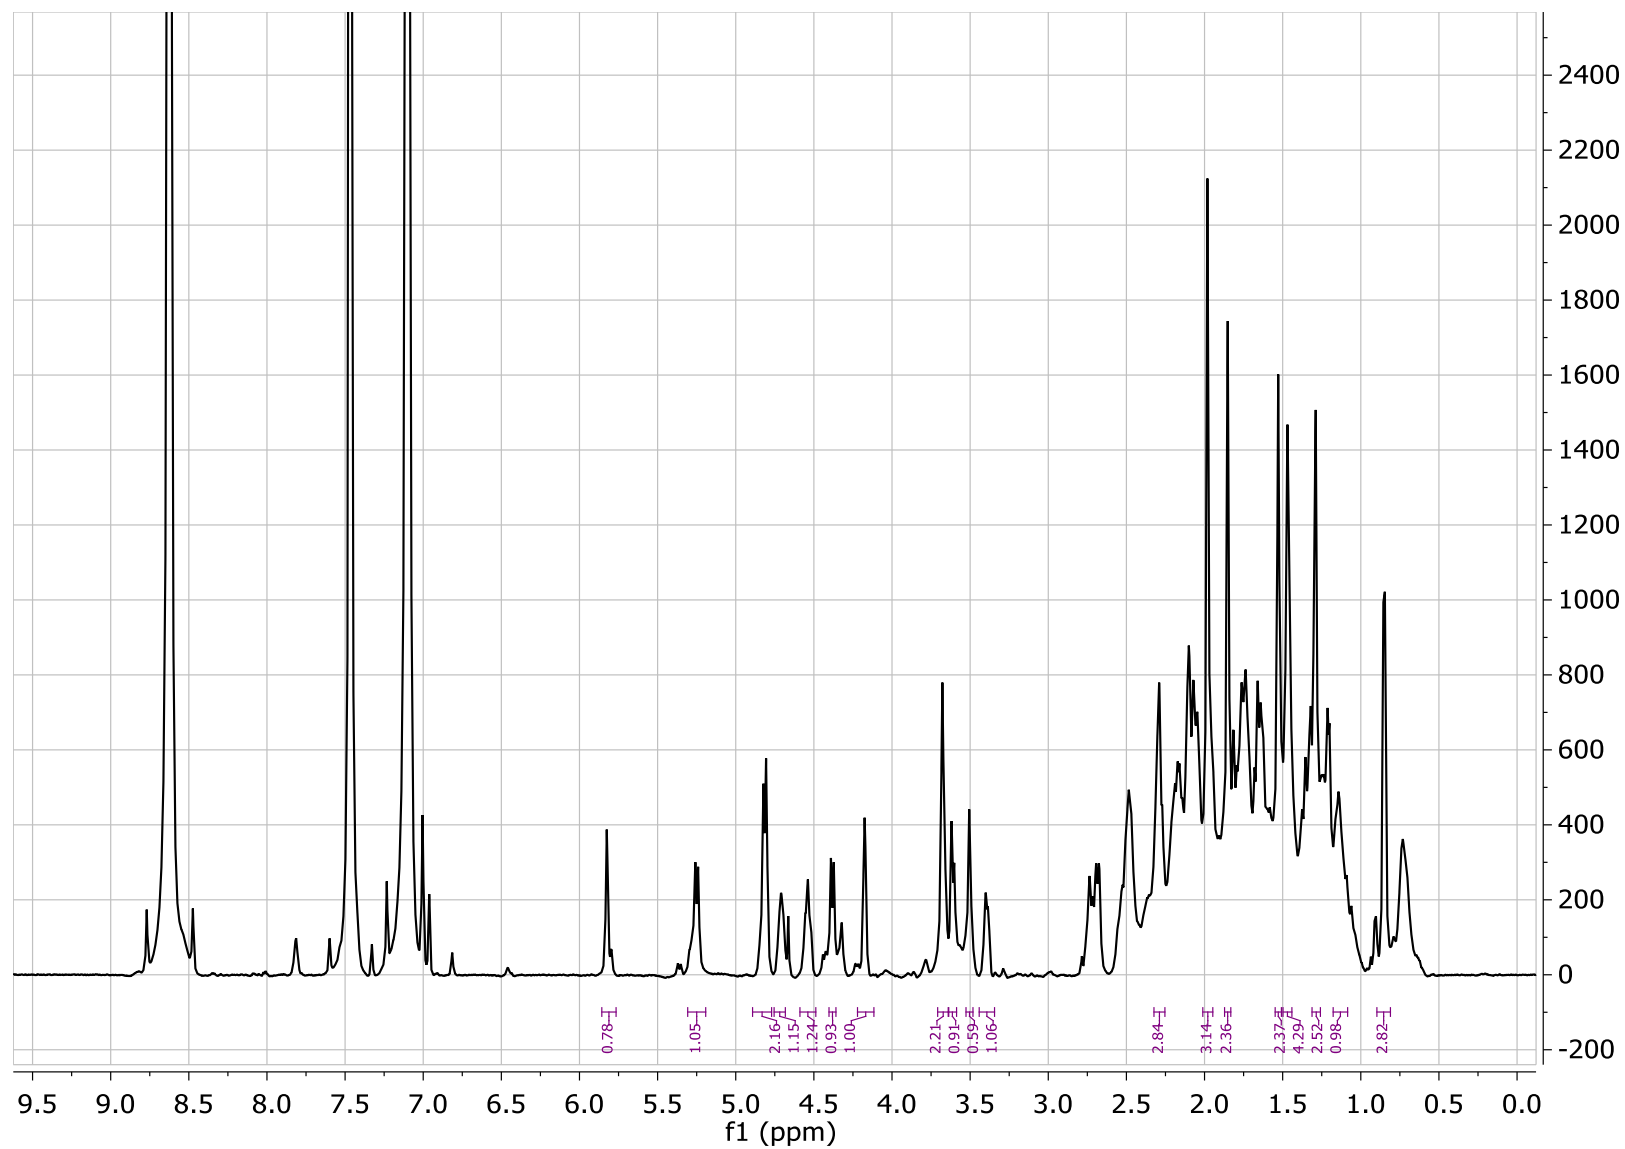

Figure S42: 1D Proton spectra of 20-Hydroxy-13,19-dimethyl-SPX C (600 MHz, pyridine-d<sub>5</sub>).

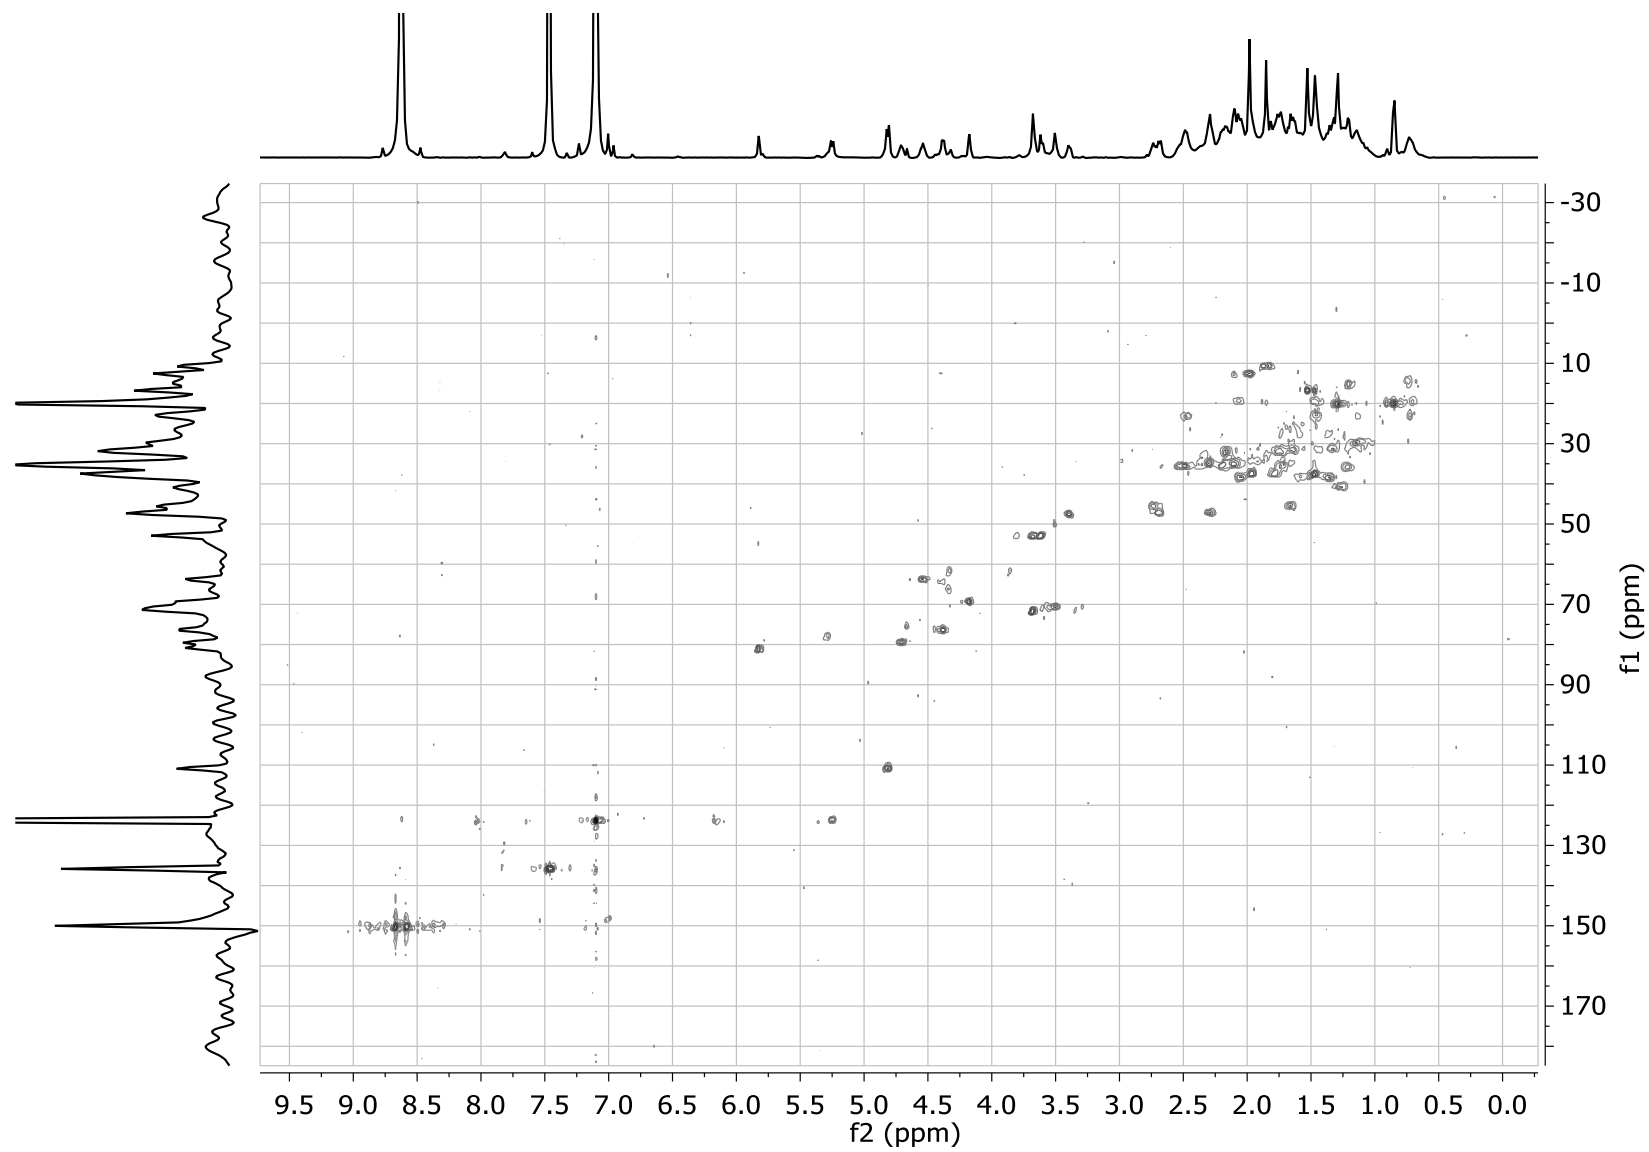

Figure S43: 2D HSQC spectra of 20-Hydroxy-13,19-dimethyl-SPX C (600 MHz Proton frequency, pyridine-d<sub>5</sub>).

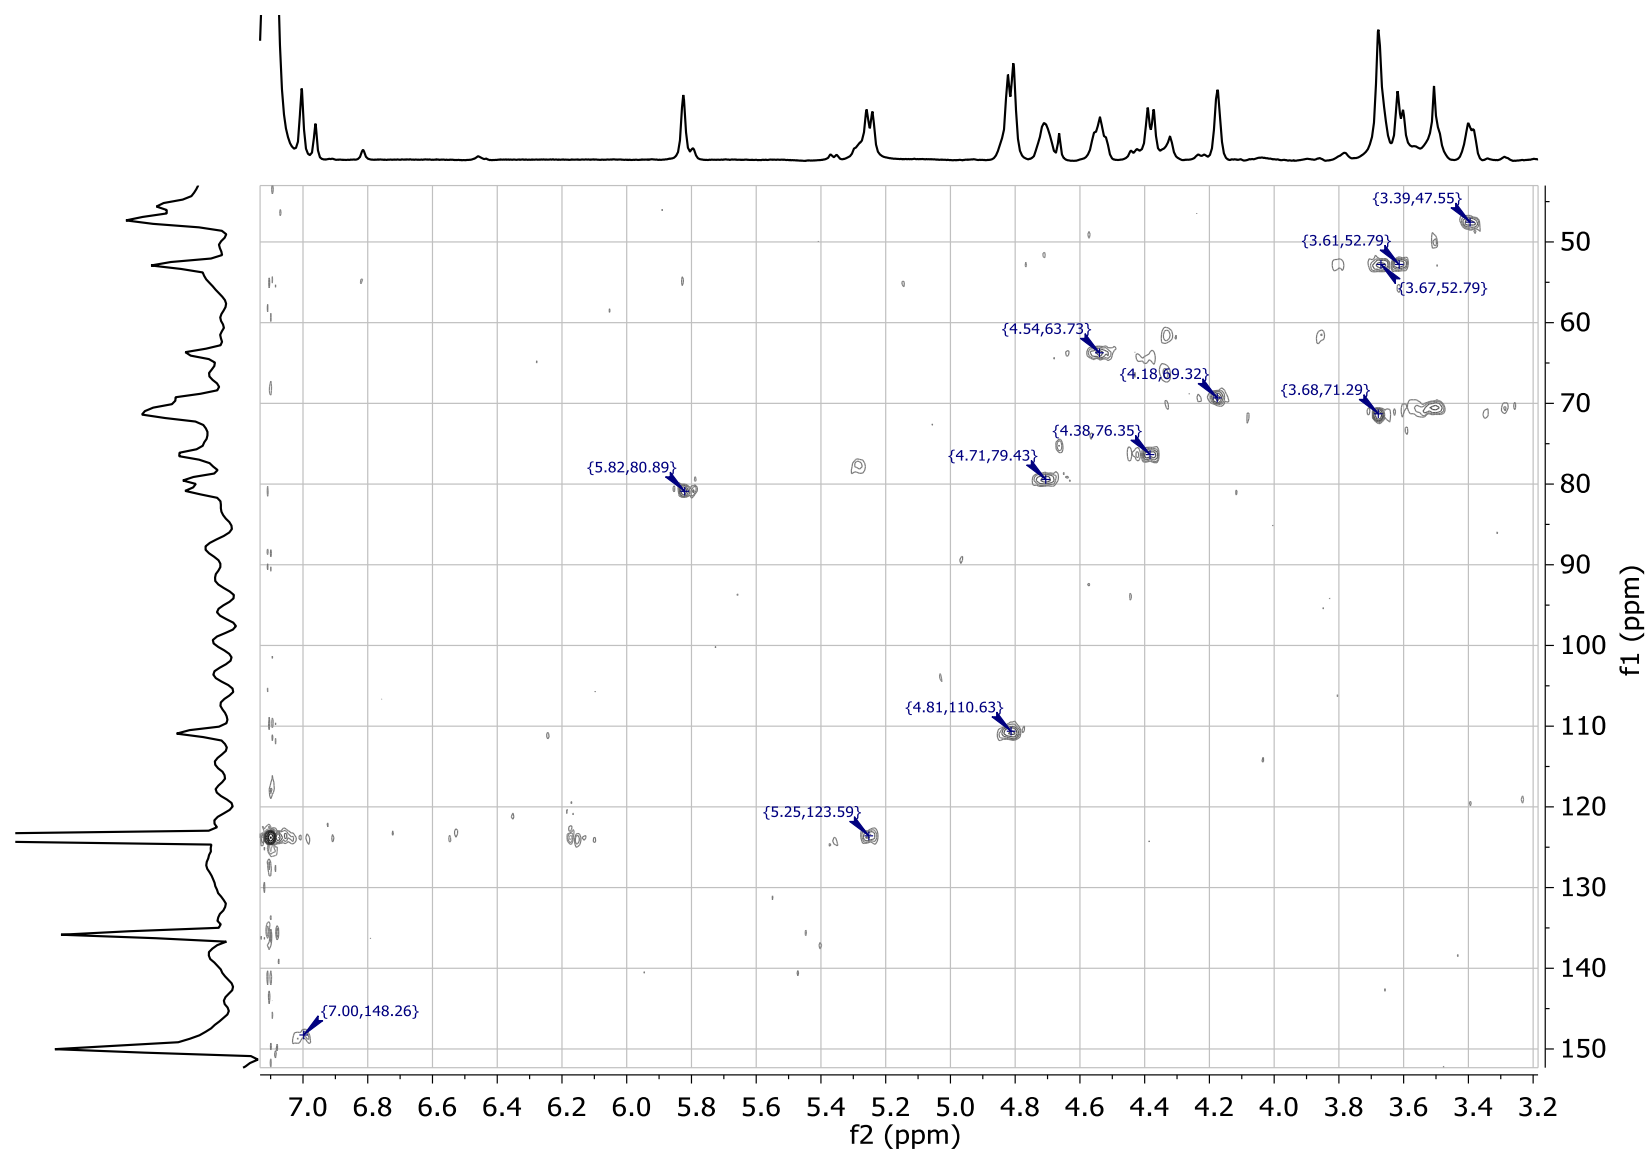

Figure S44: Slice 1 of 2D HSQC spectra of 20-Hydroxy-13,19-didesMethyl-SPX C (600 MHz Proton frequency, pyridine-d<sub>5</sub>).

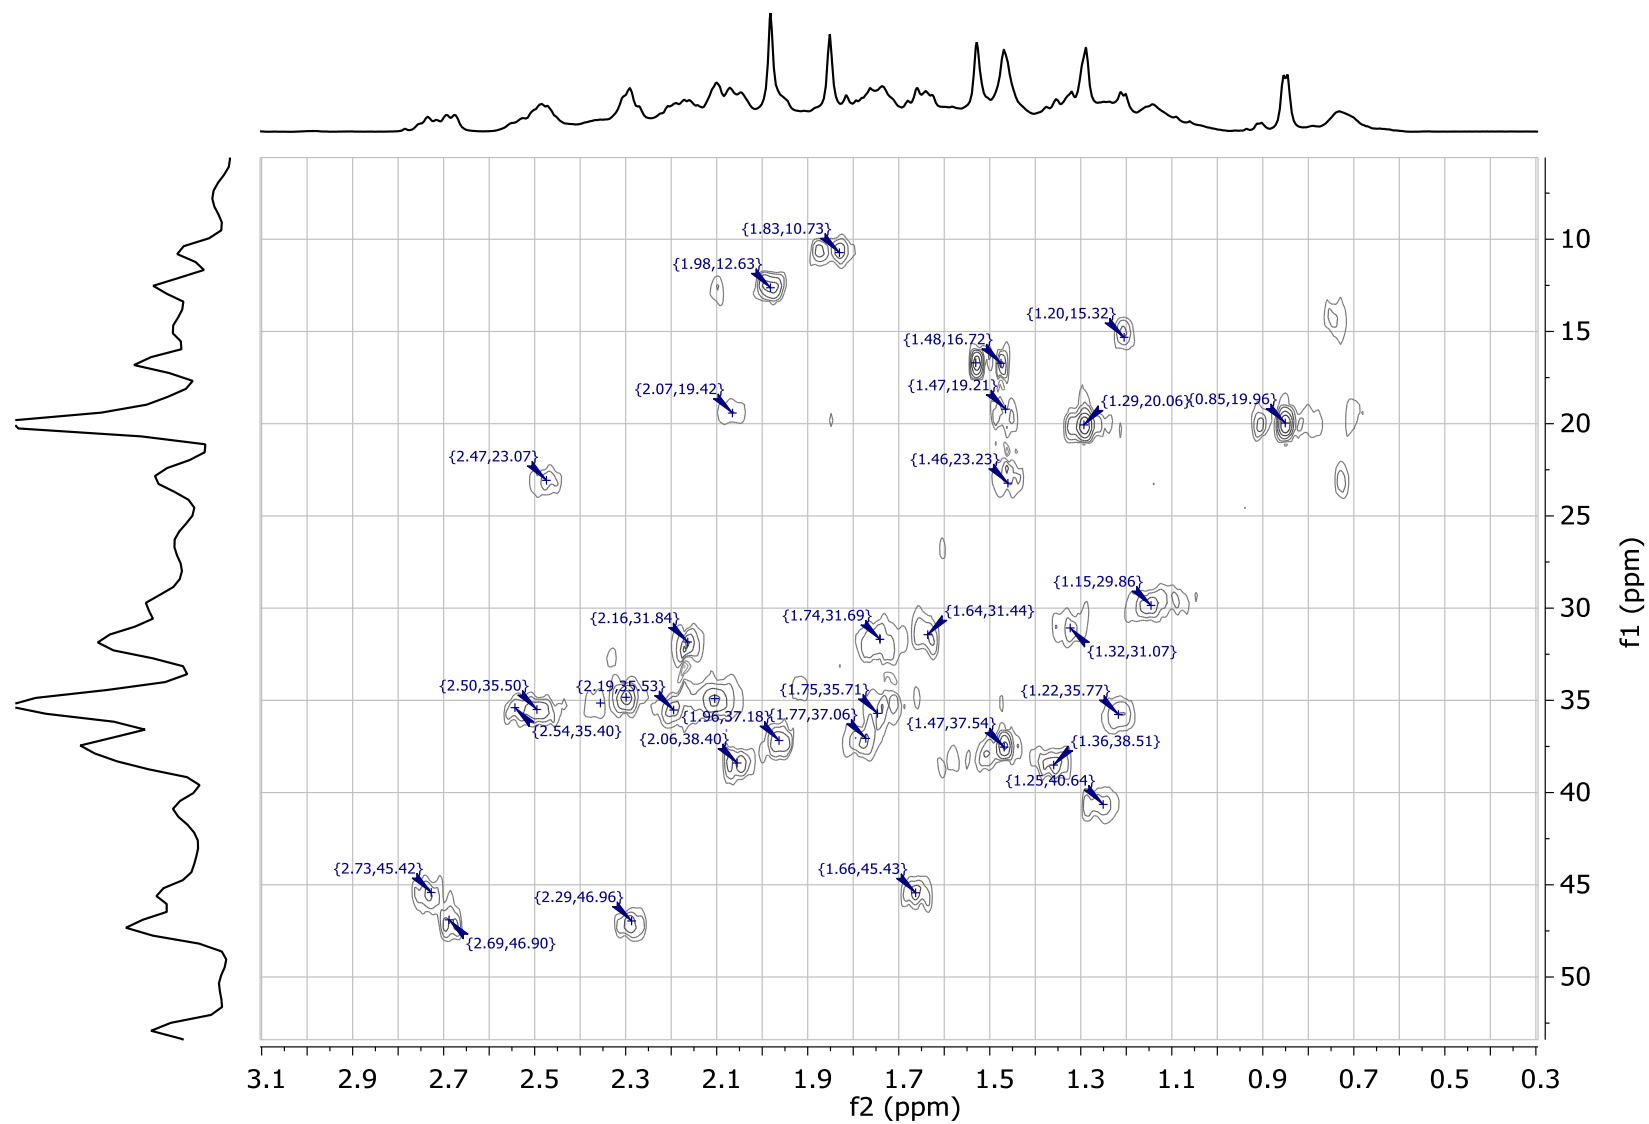

Figure S45: Slice 2 of 2D HSQC spectra of 20-Hydroxy-13,19-didesMethyl-SPX C (600 MHz Proton frequency, pyridine-d<sub>5</sub>).

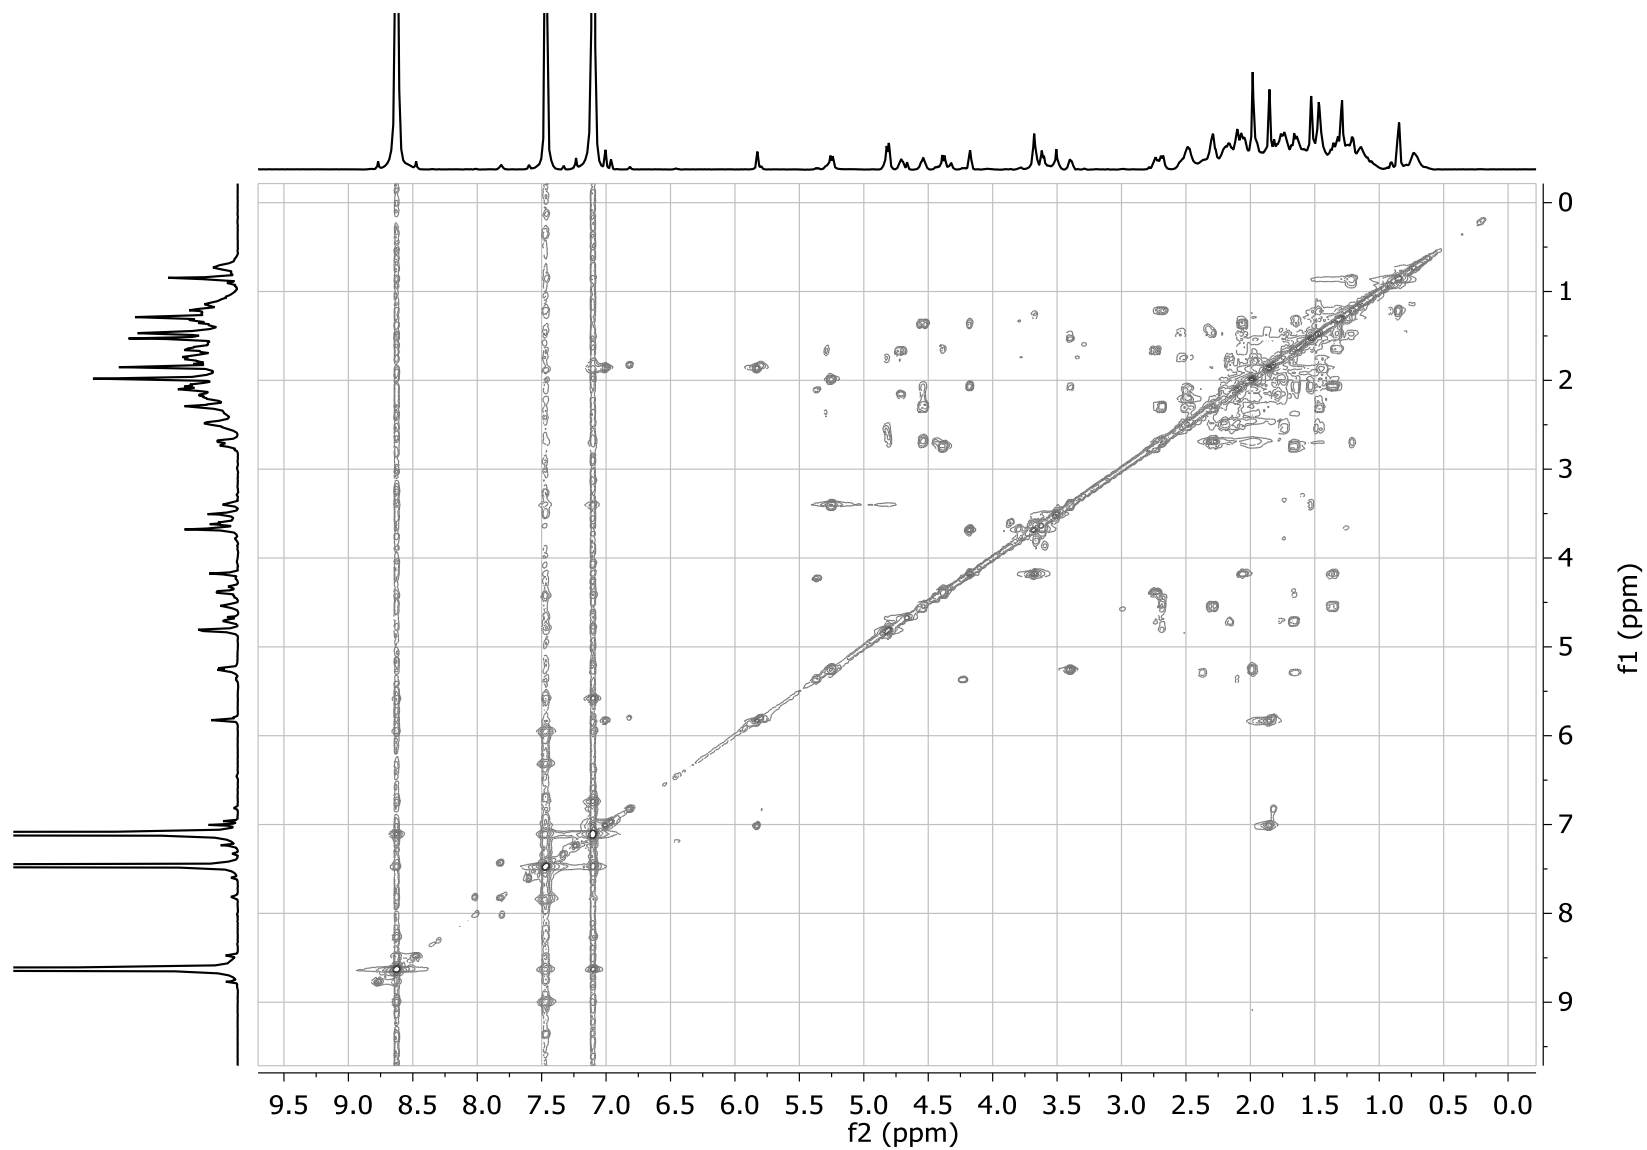

Figure S46: 2D COSY spectra of 20-Hydroxy-13,19-dimethyl-SPX C (600 MHz, pyridine-d<sub>5</sub>).



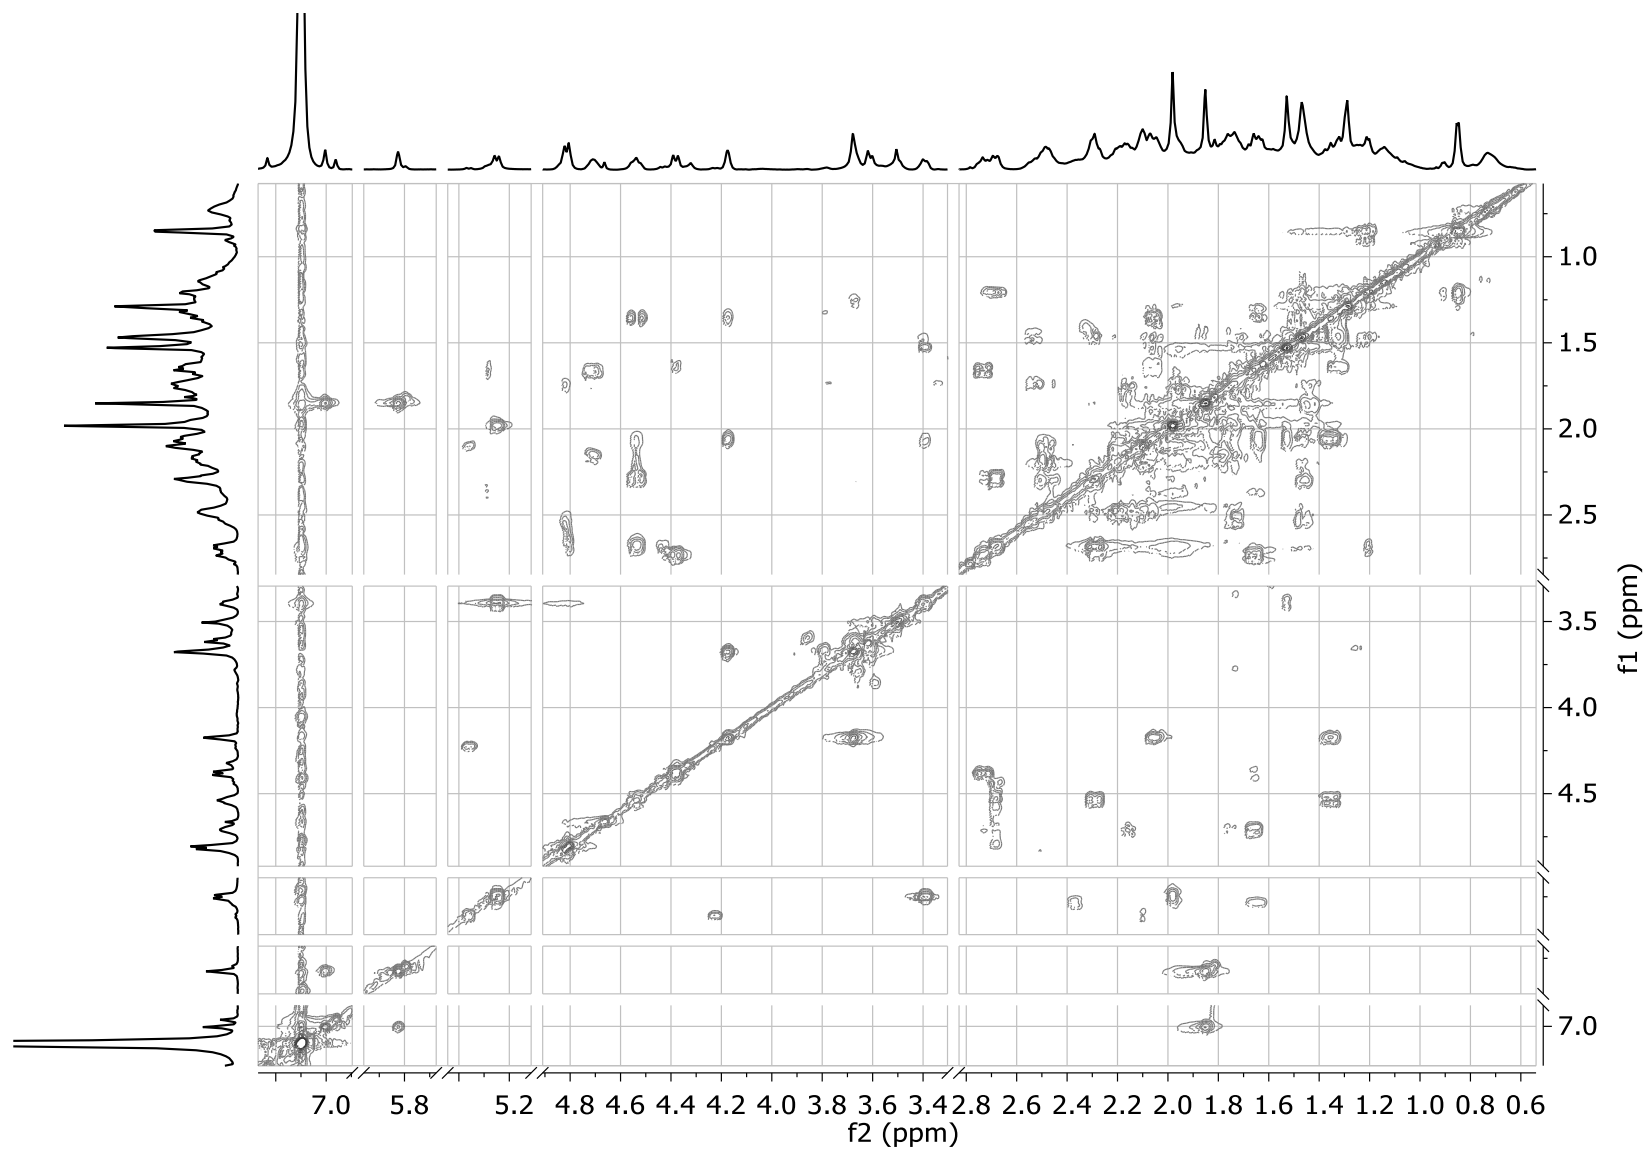

Figure S47: Slice of 2D COSY spectra of 20-Hydroxy-13,19-didesMethyl-SPX C (600 MHz, pyridine-d<sub>5</sub>).

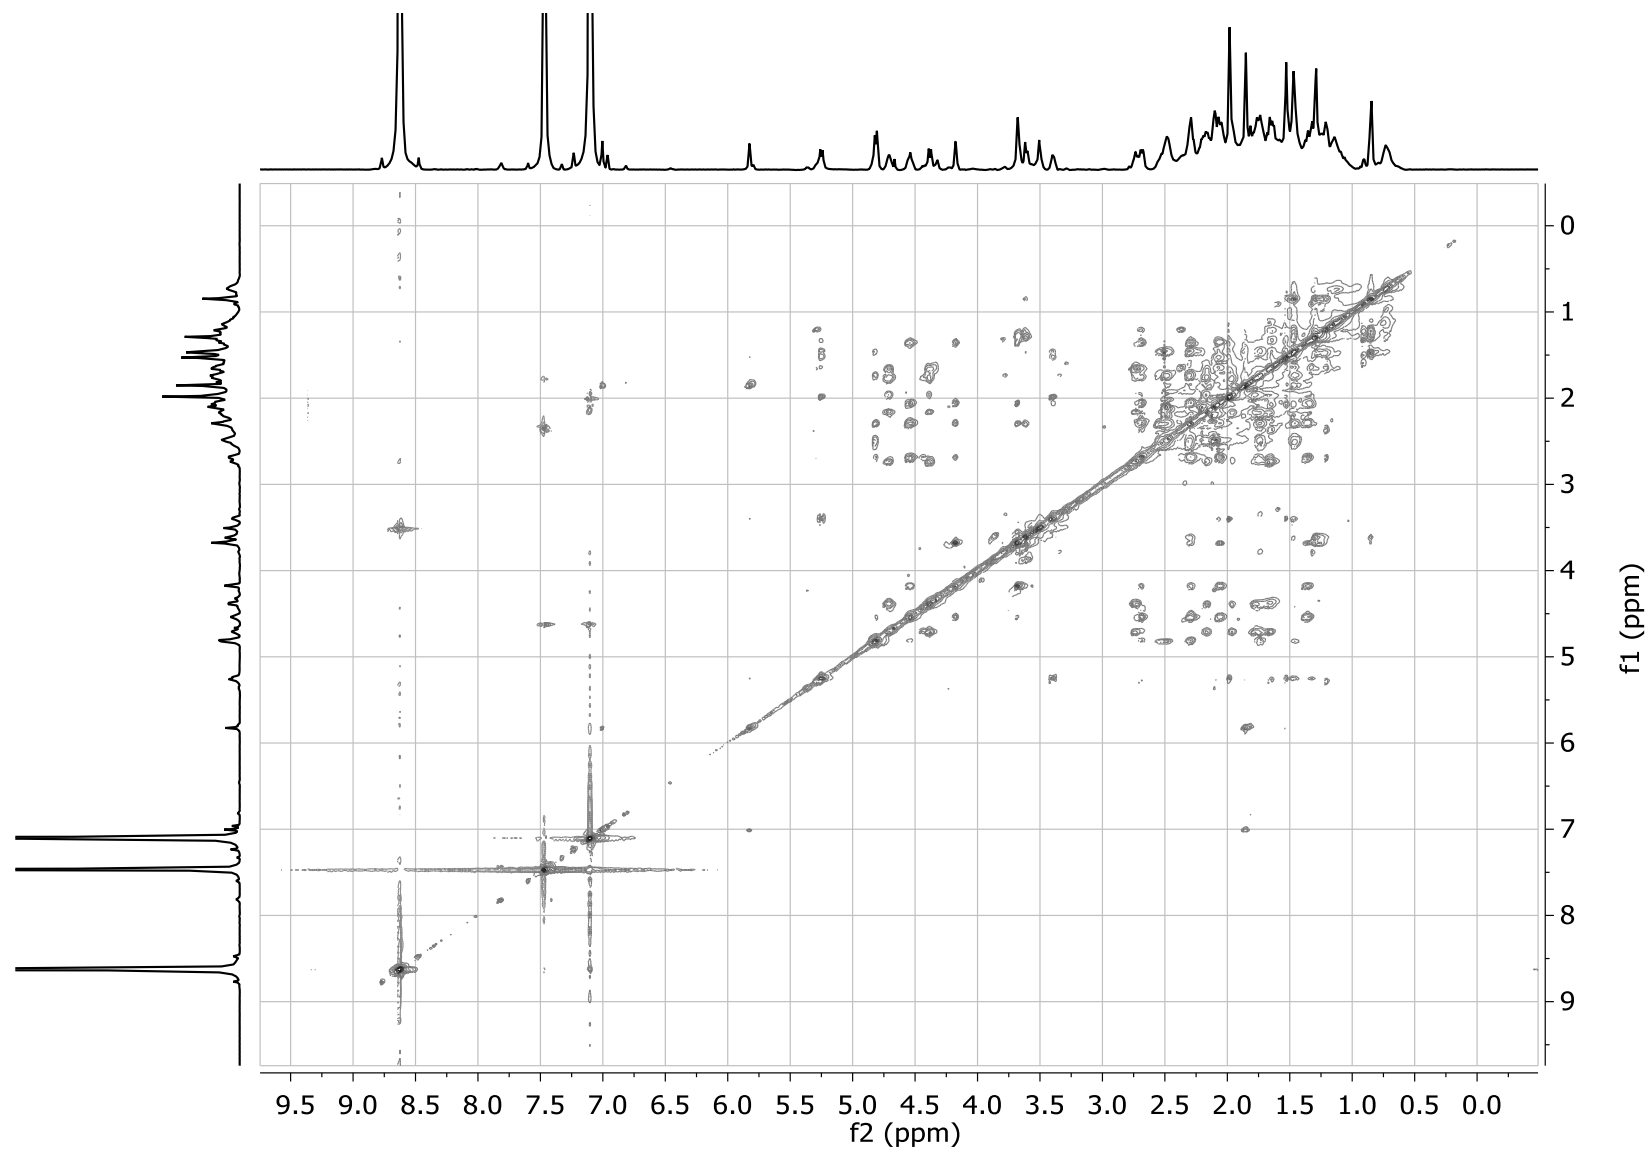

Figure S48: 2D TOCSY spectra of 20-Hydroxy-13,19-dimethyl-SPX C (600 MHz, pyridine-d<sub>5</sub>).

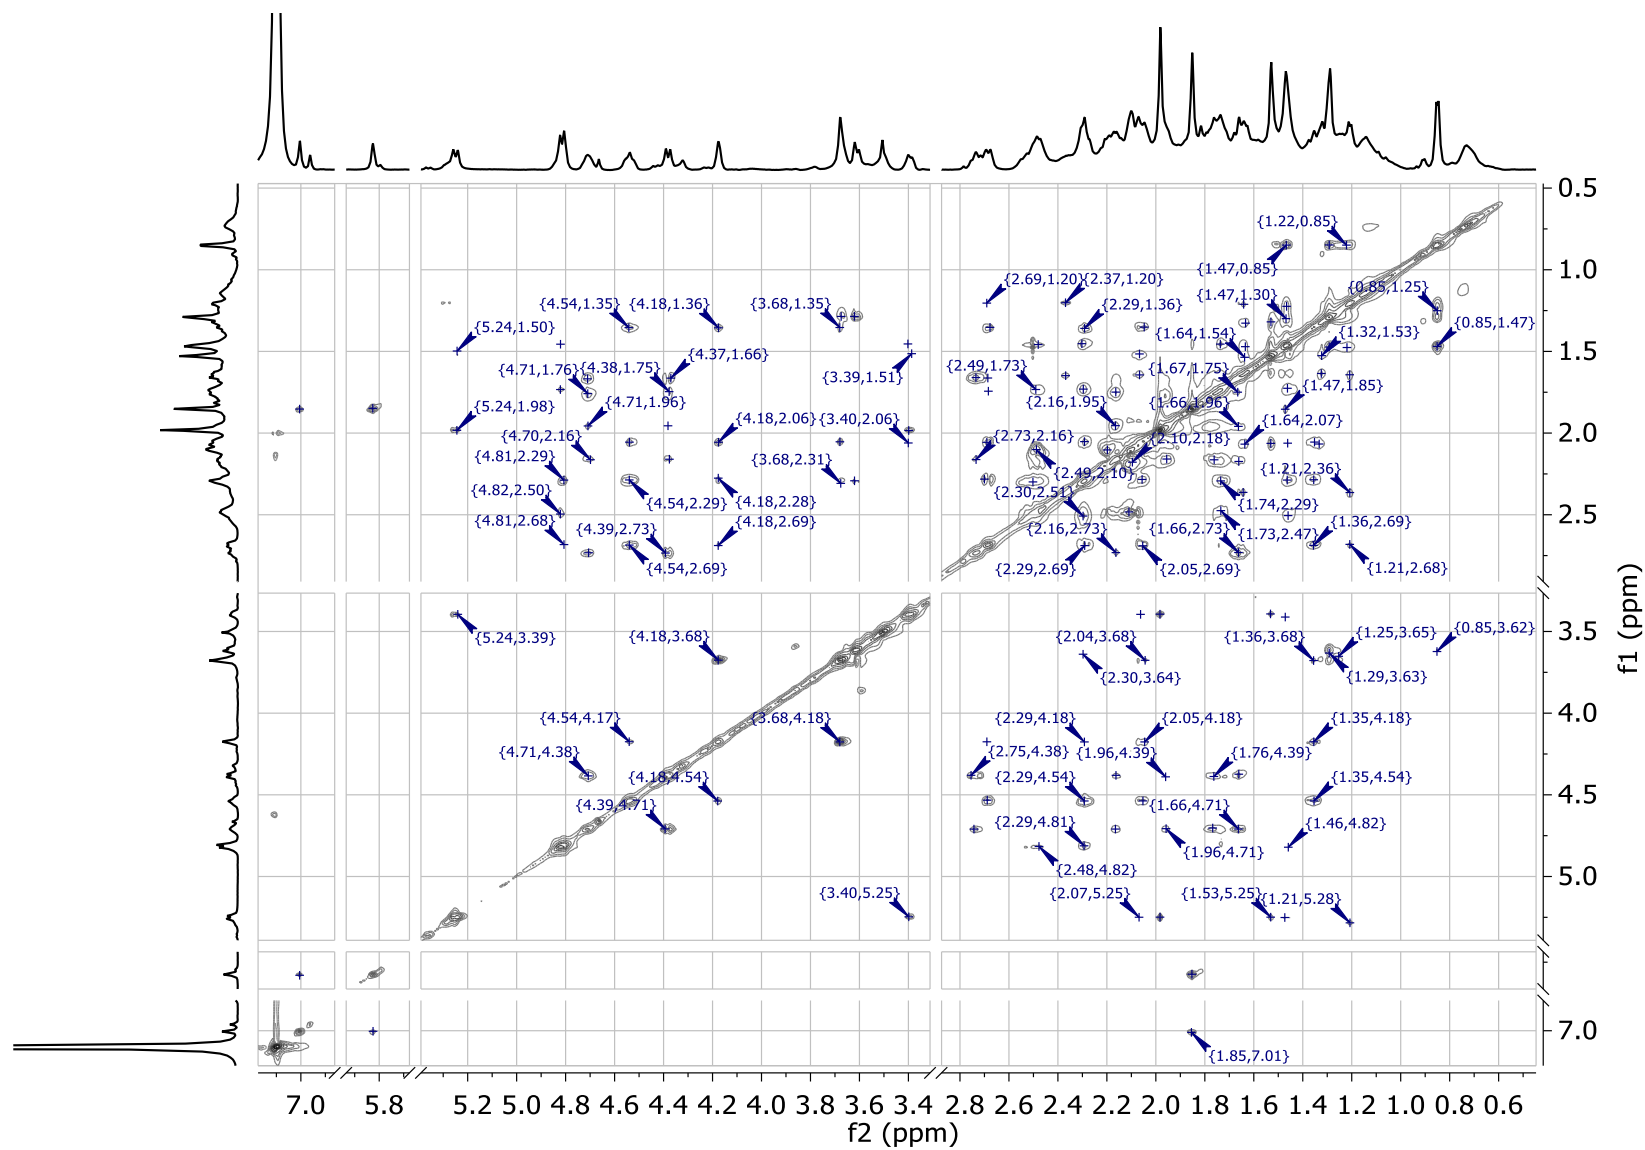

Figure S49: Slice of 2D TOCSY spectra of 20-Hydroxy-13,19-didesMethyl-SPX C (600 MHz, pyridine-d<sub>5</sub>).

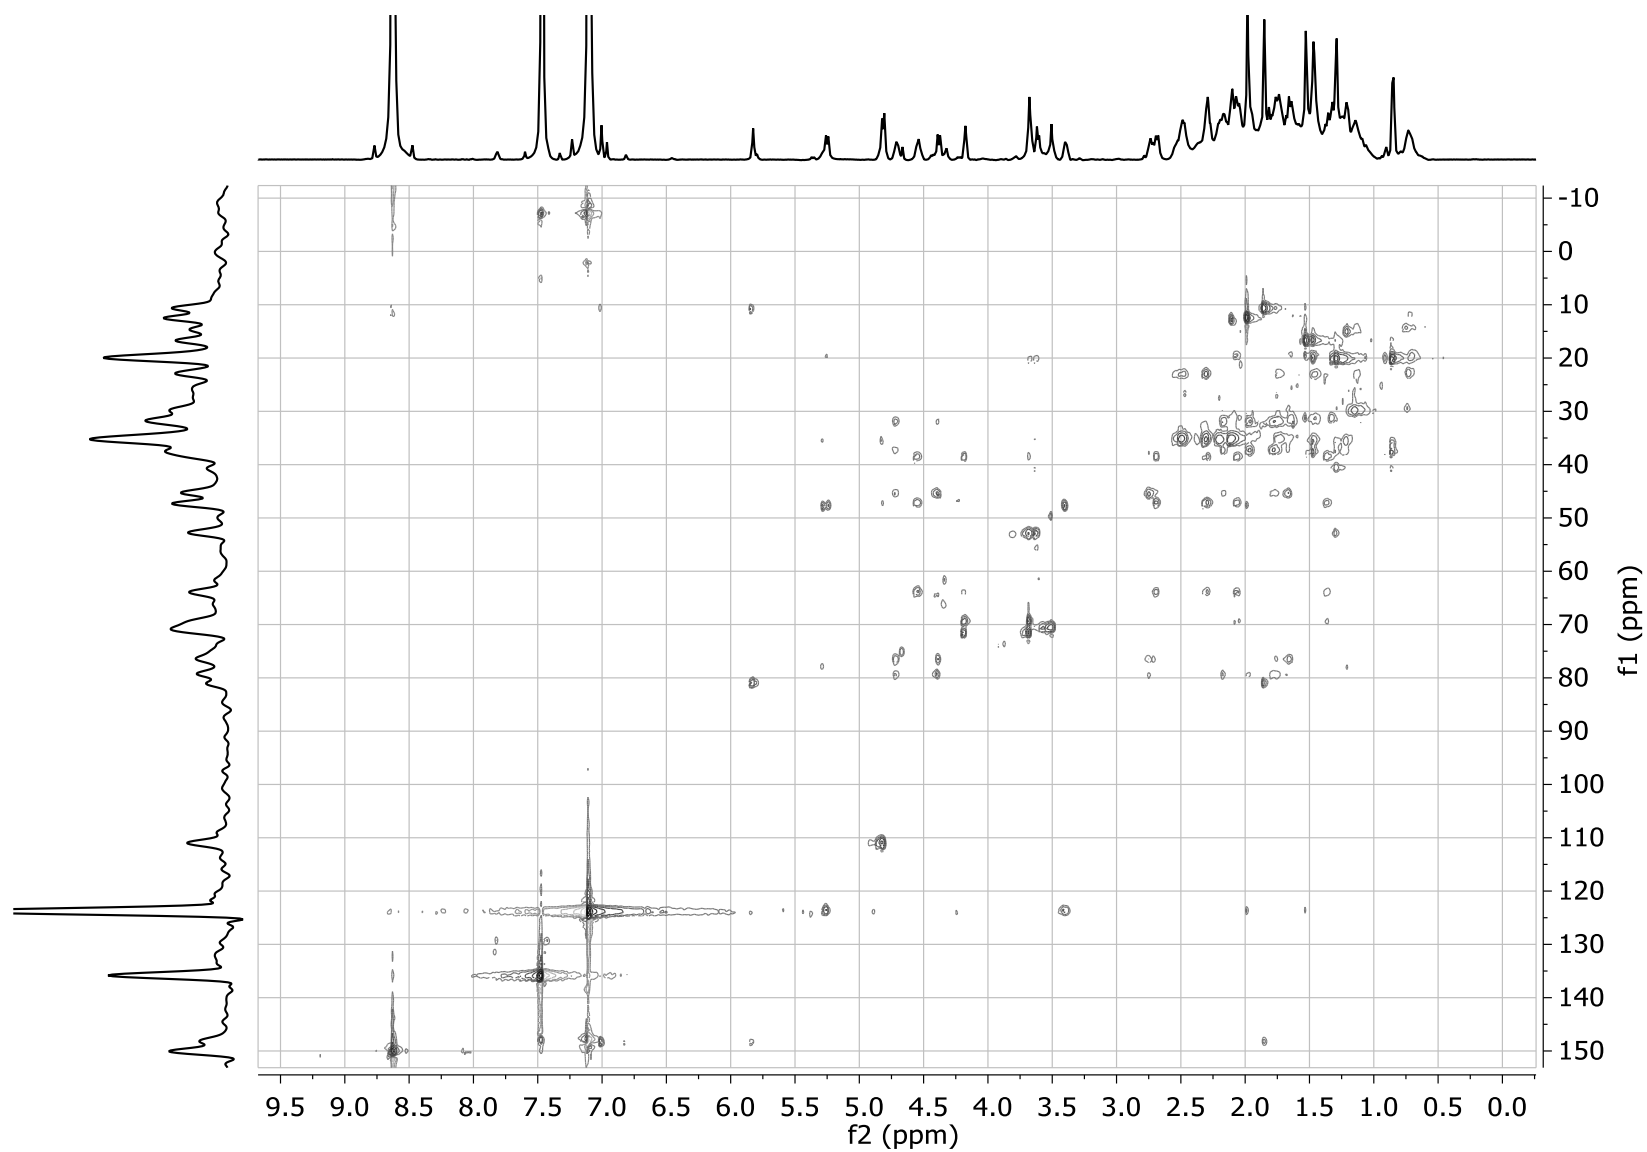

Figure S50: 2D HSQC-TOCSY spectra of 20-Hydroxy-13,19-dimethyl-SPX C (600 MHz Proton frequency, pyridine-d<sub>5</sub>).

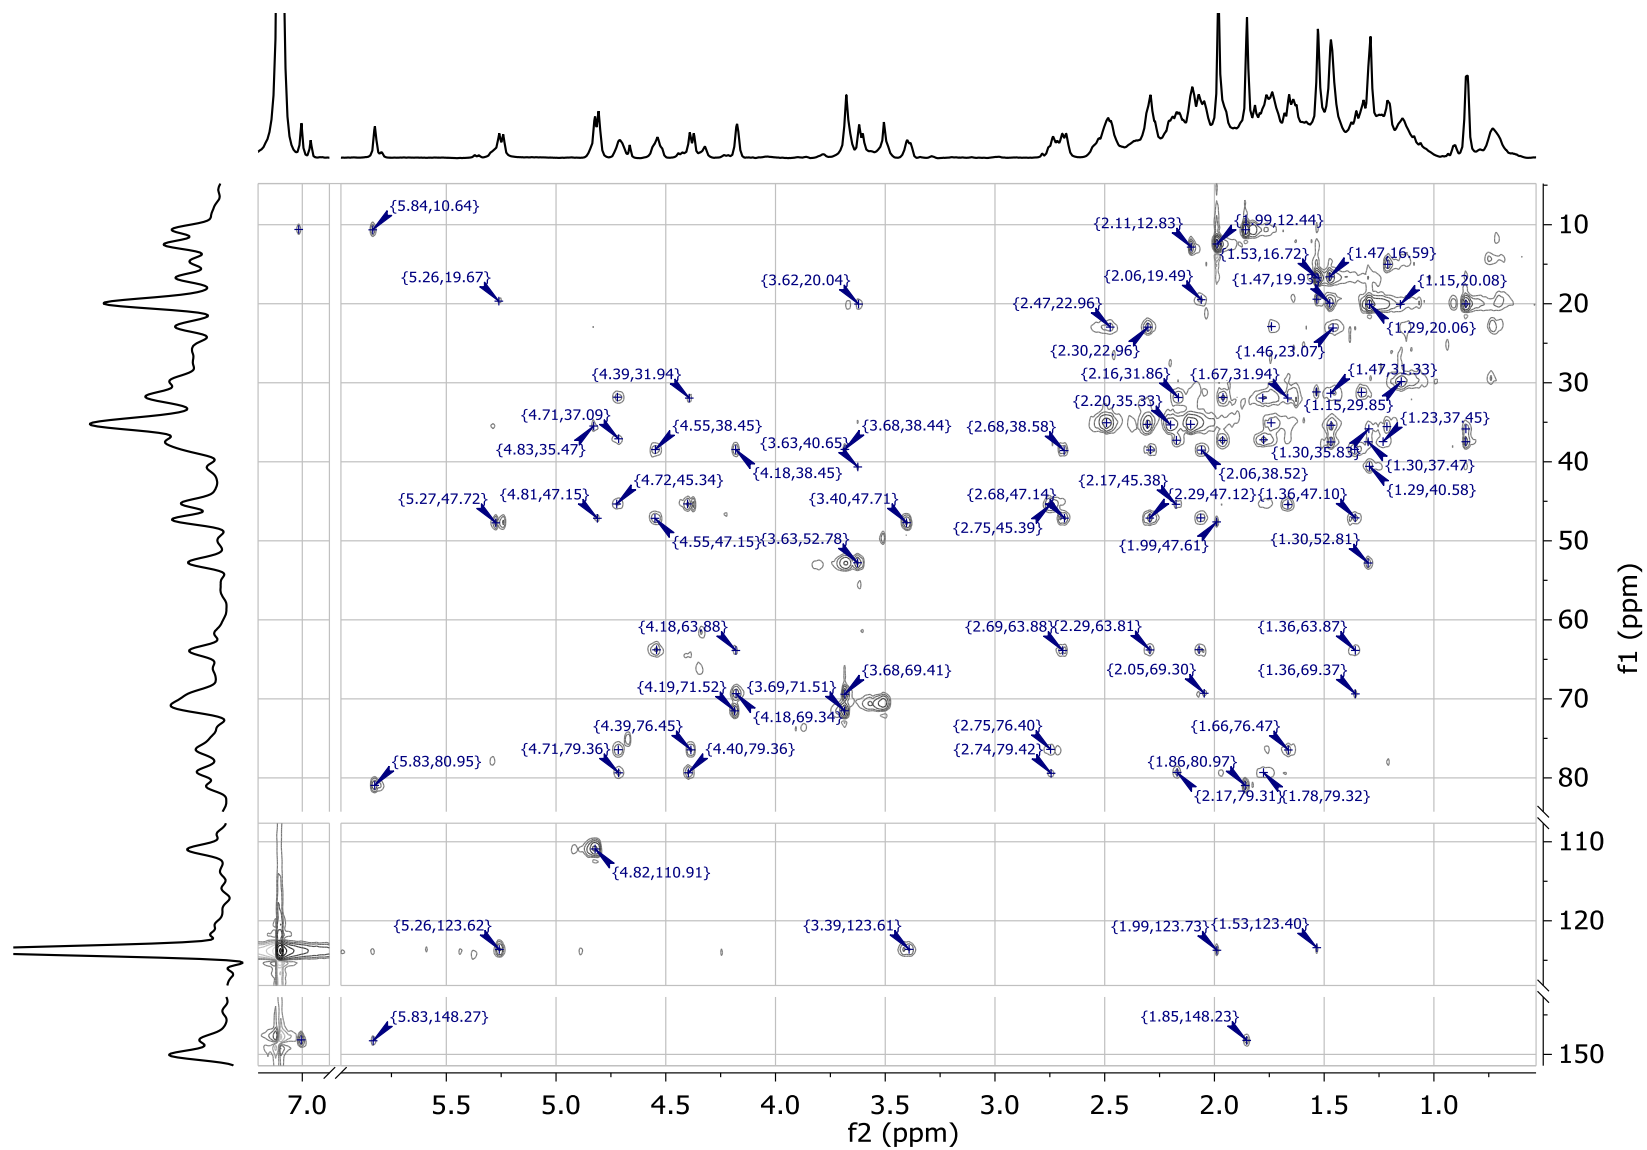

Figure S51: Slice of 2D HSQC-TOCSY spectra of 20-Hydroxy-13,19-didesMethyl-SPX C (600 MHz Proton frequency, pyridine-d<sub>5</sub>).

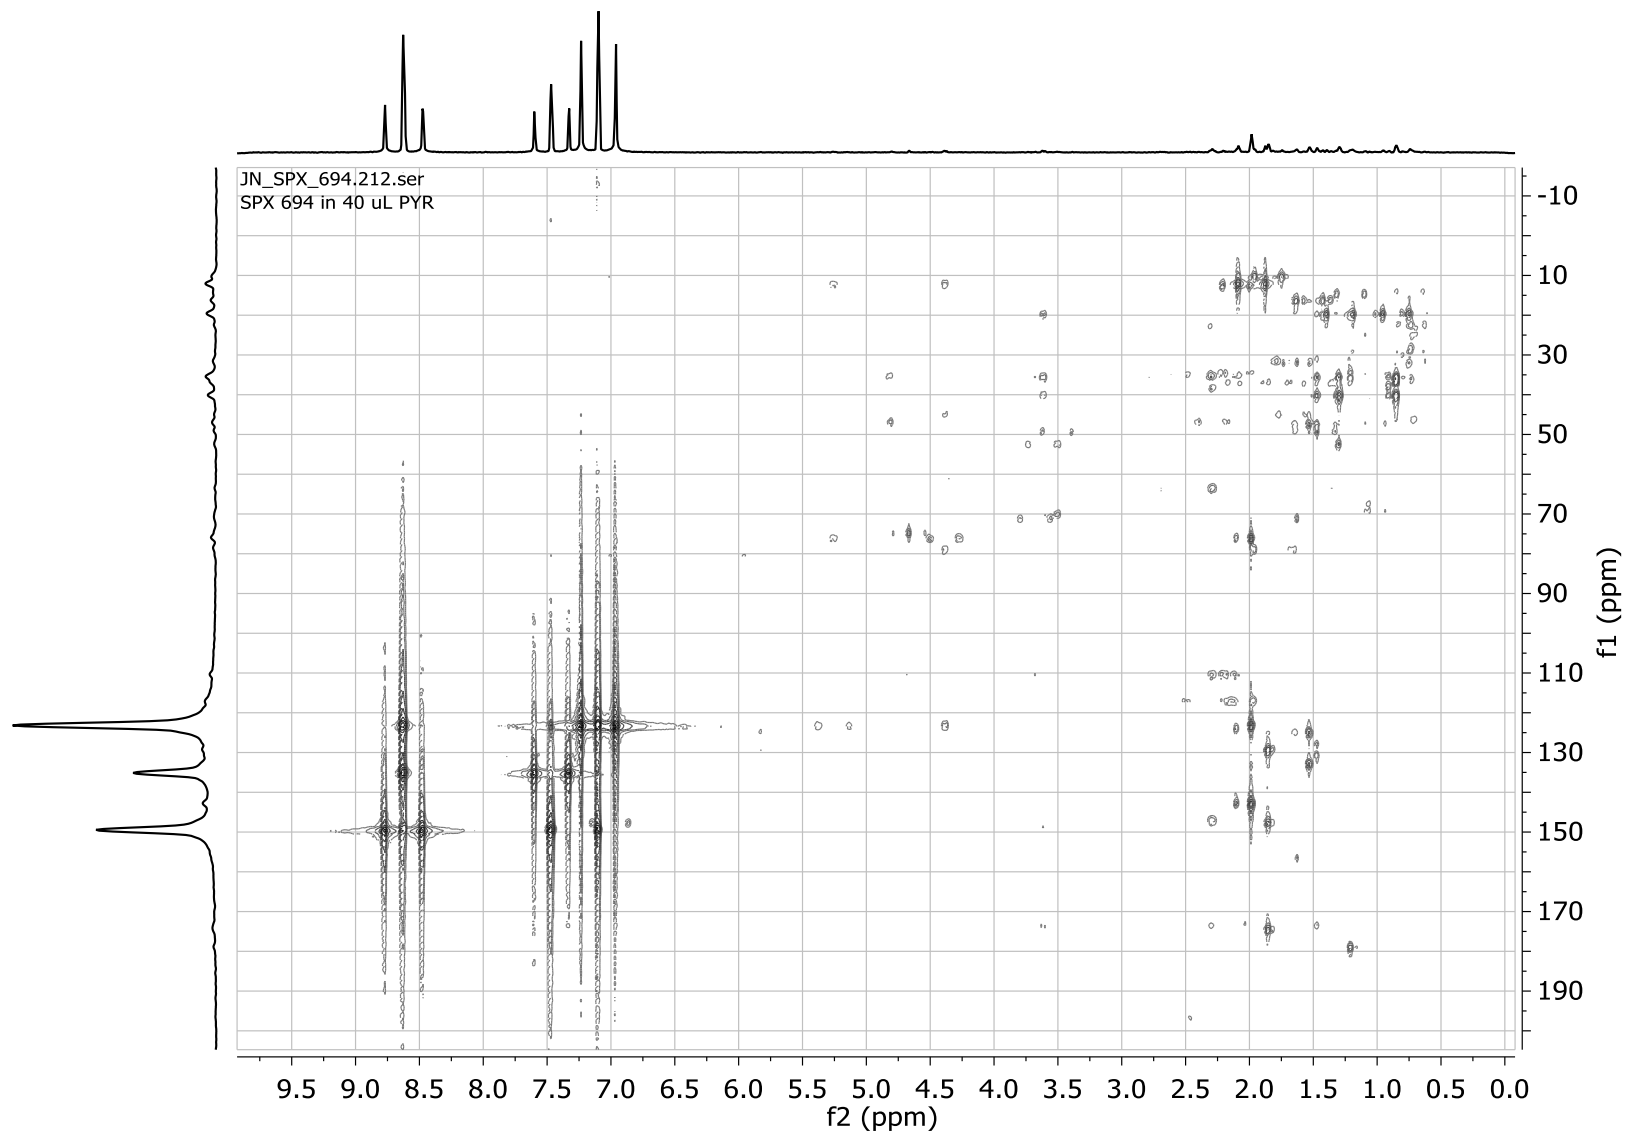

Figure S52: 2D HMBC spectra of 20-Hydroxy-13,19-dimethyl-SPX C (600 MHz Proton frequency, pyridine-d<sub>5</sub>).

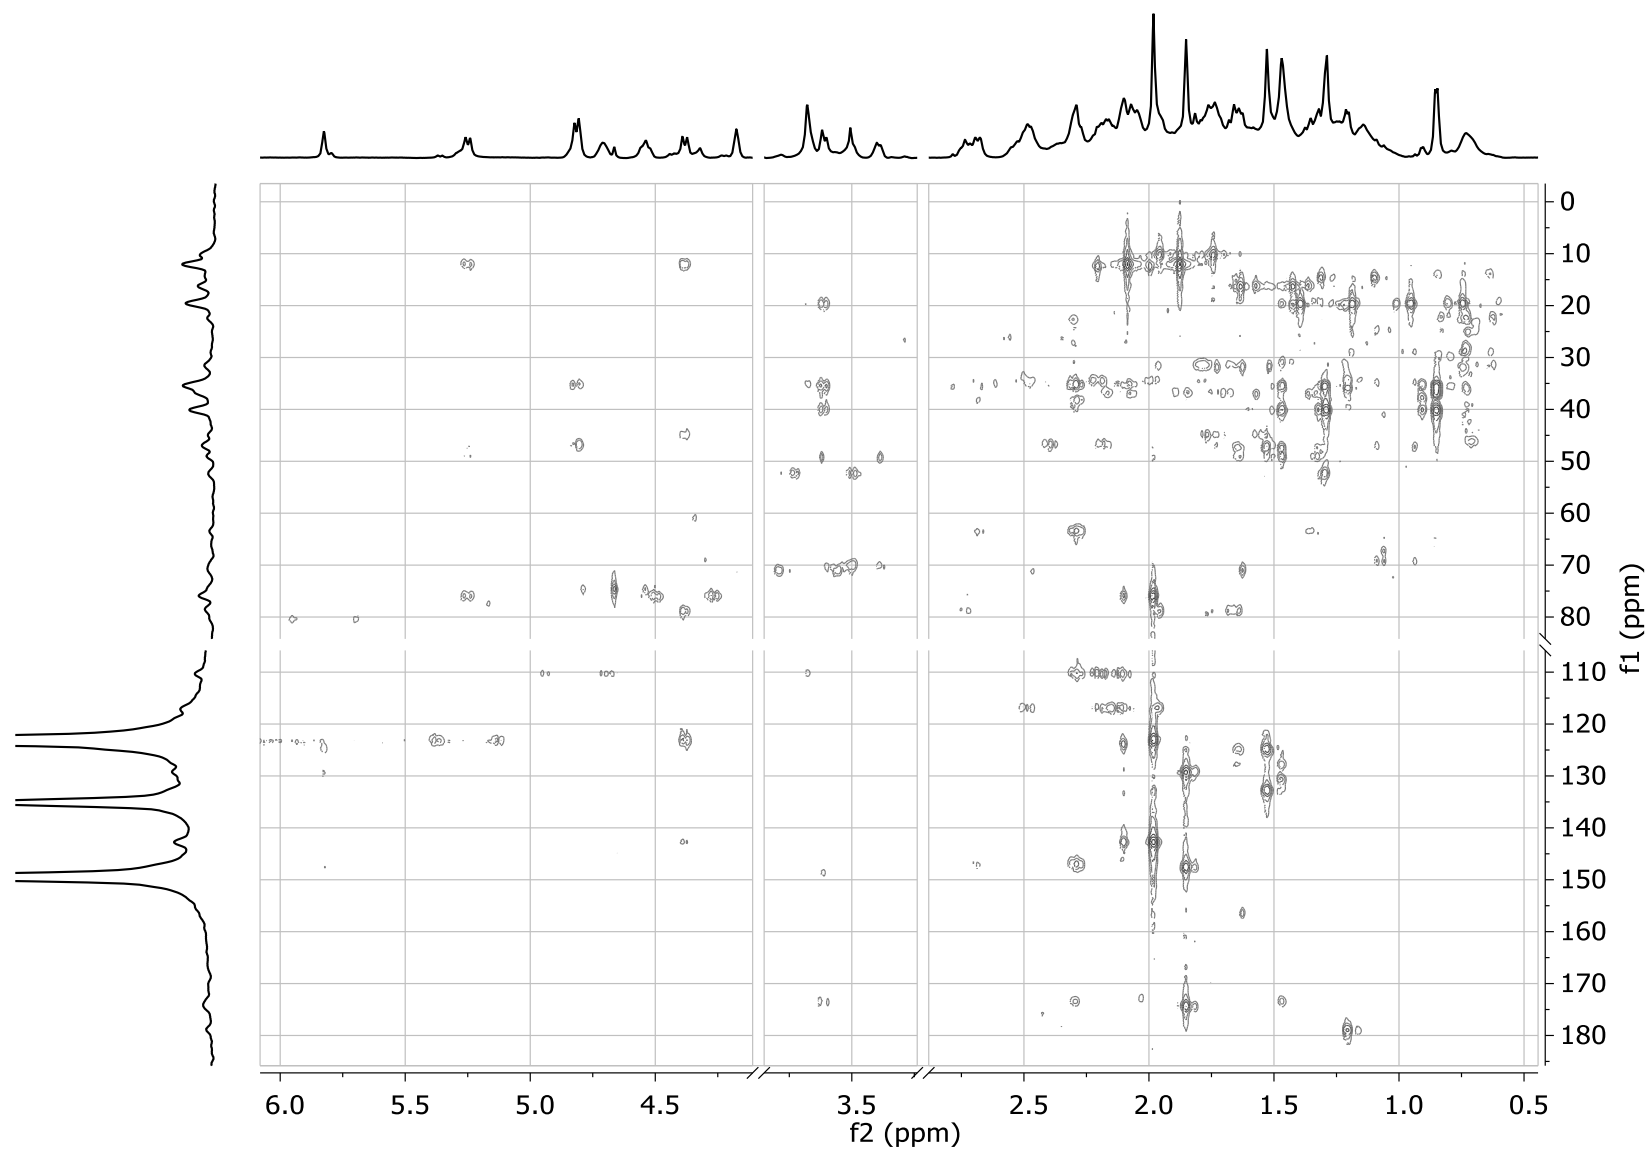

Figure S53: Slice of 2D HMBC spectra of 20-Hydroxy-13,19-dimethyl-SPX C (600 MHz Proton frequency, pyridine-d<sub>5</sub>).

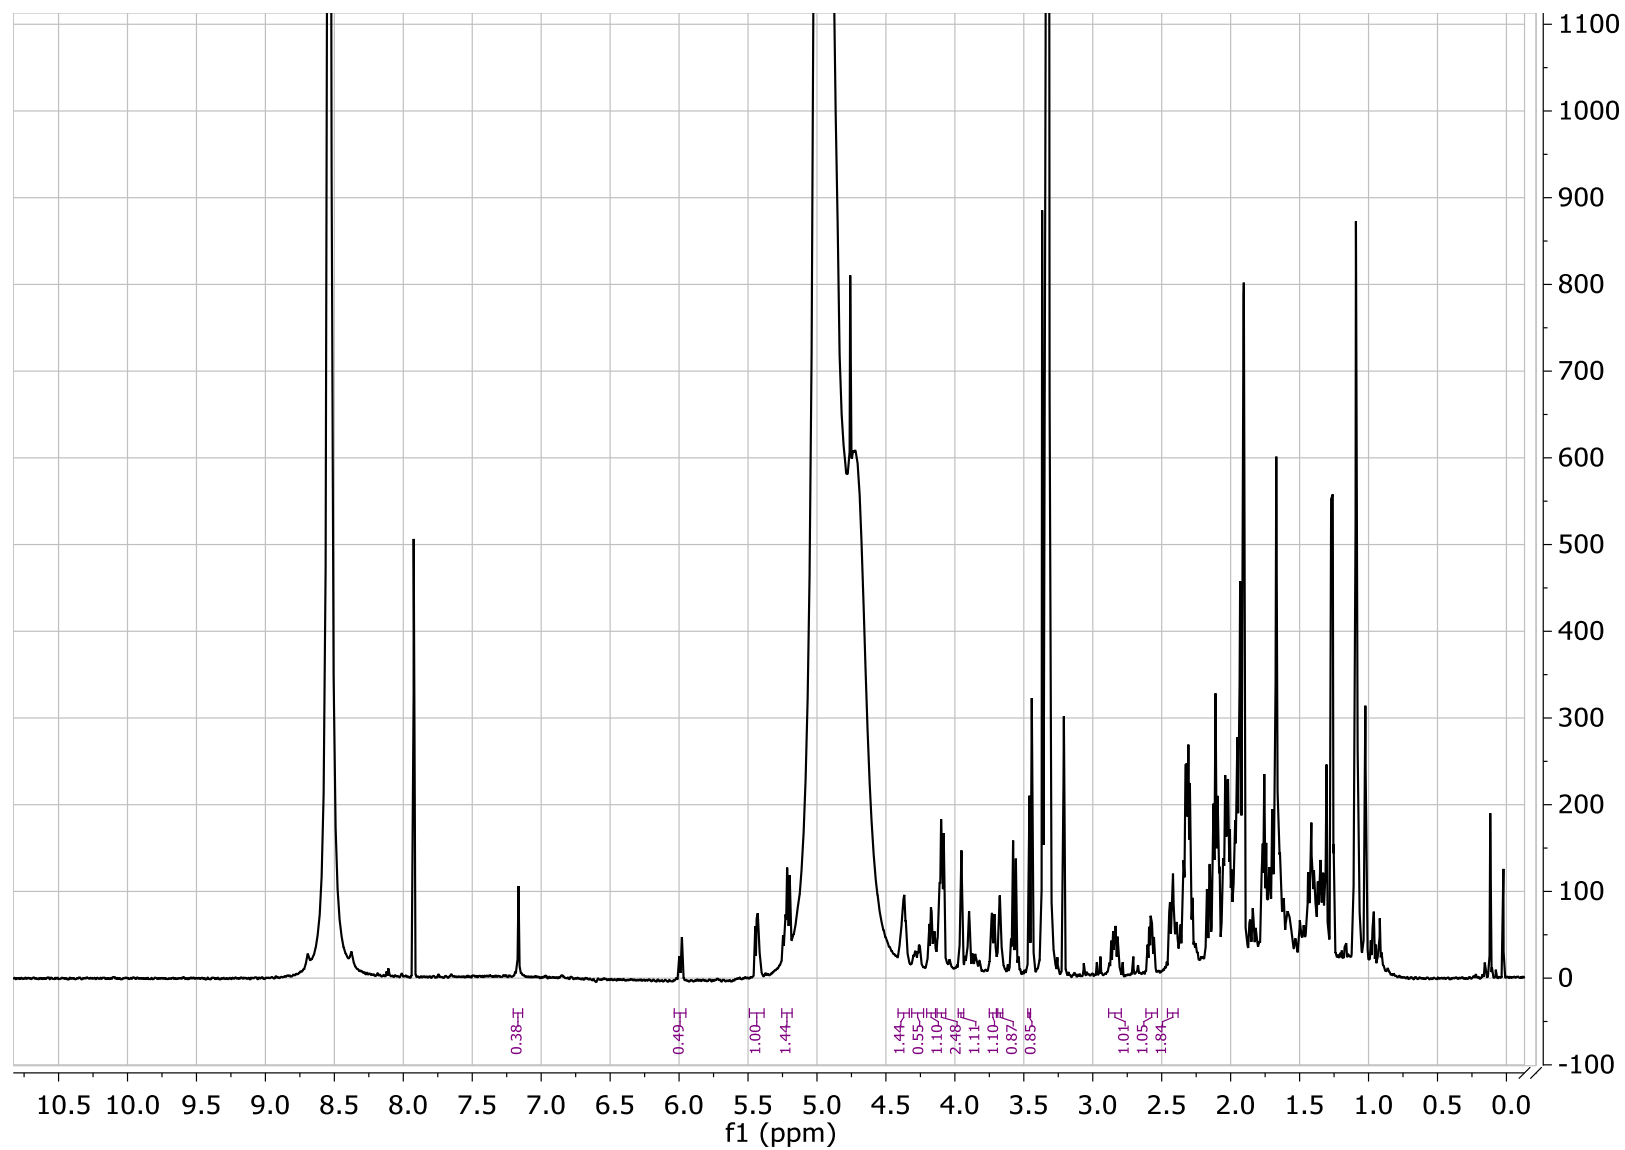

Figure S54: 1D Proton spectra of 20-Hydroxy-13,19-dimethyl-SPX D (600 MHz, CD<sub>3</sub>OD).



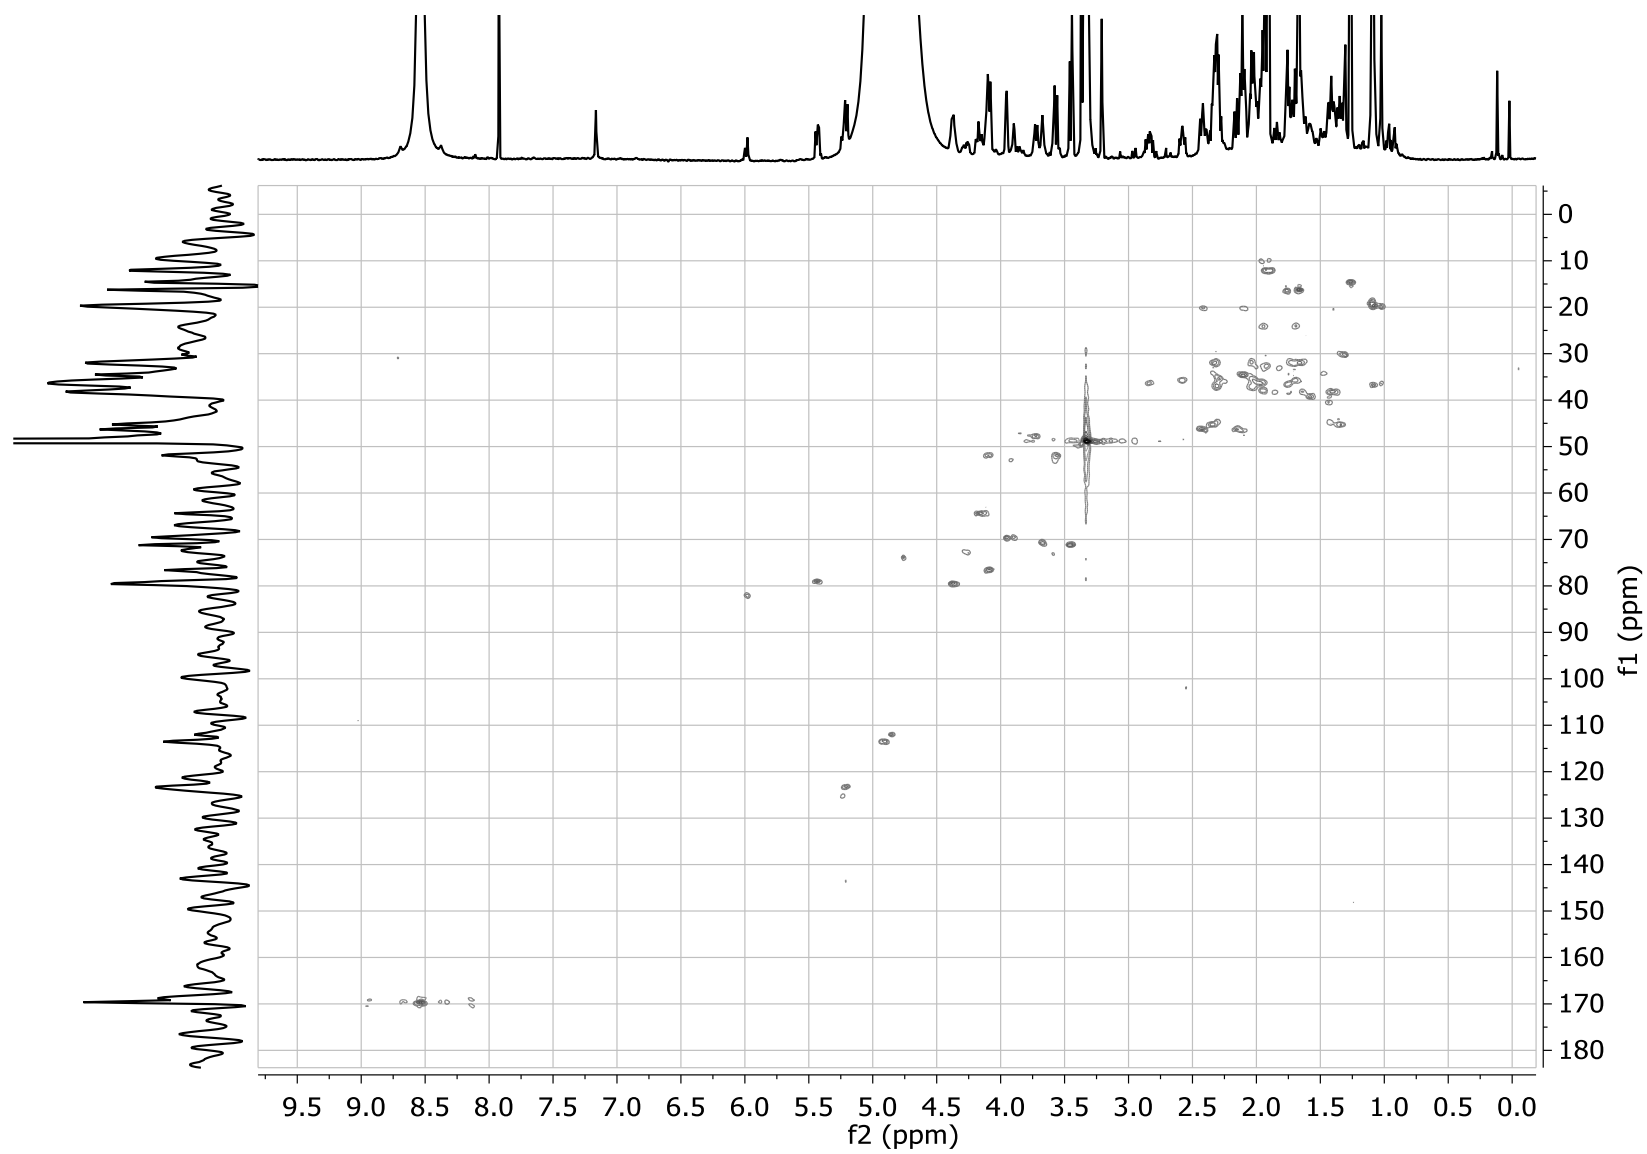

Figure S55: 2D HSQC spectra of 20-Hydroxy-13,19-dimethyl-SPX D (600 MHz Proton frequency, CD<sub>3</sub>OD).

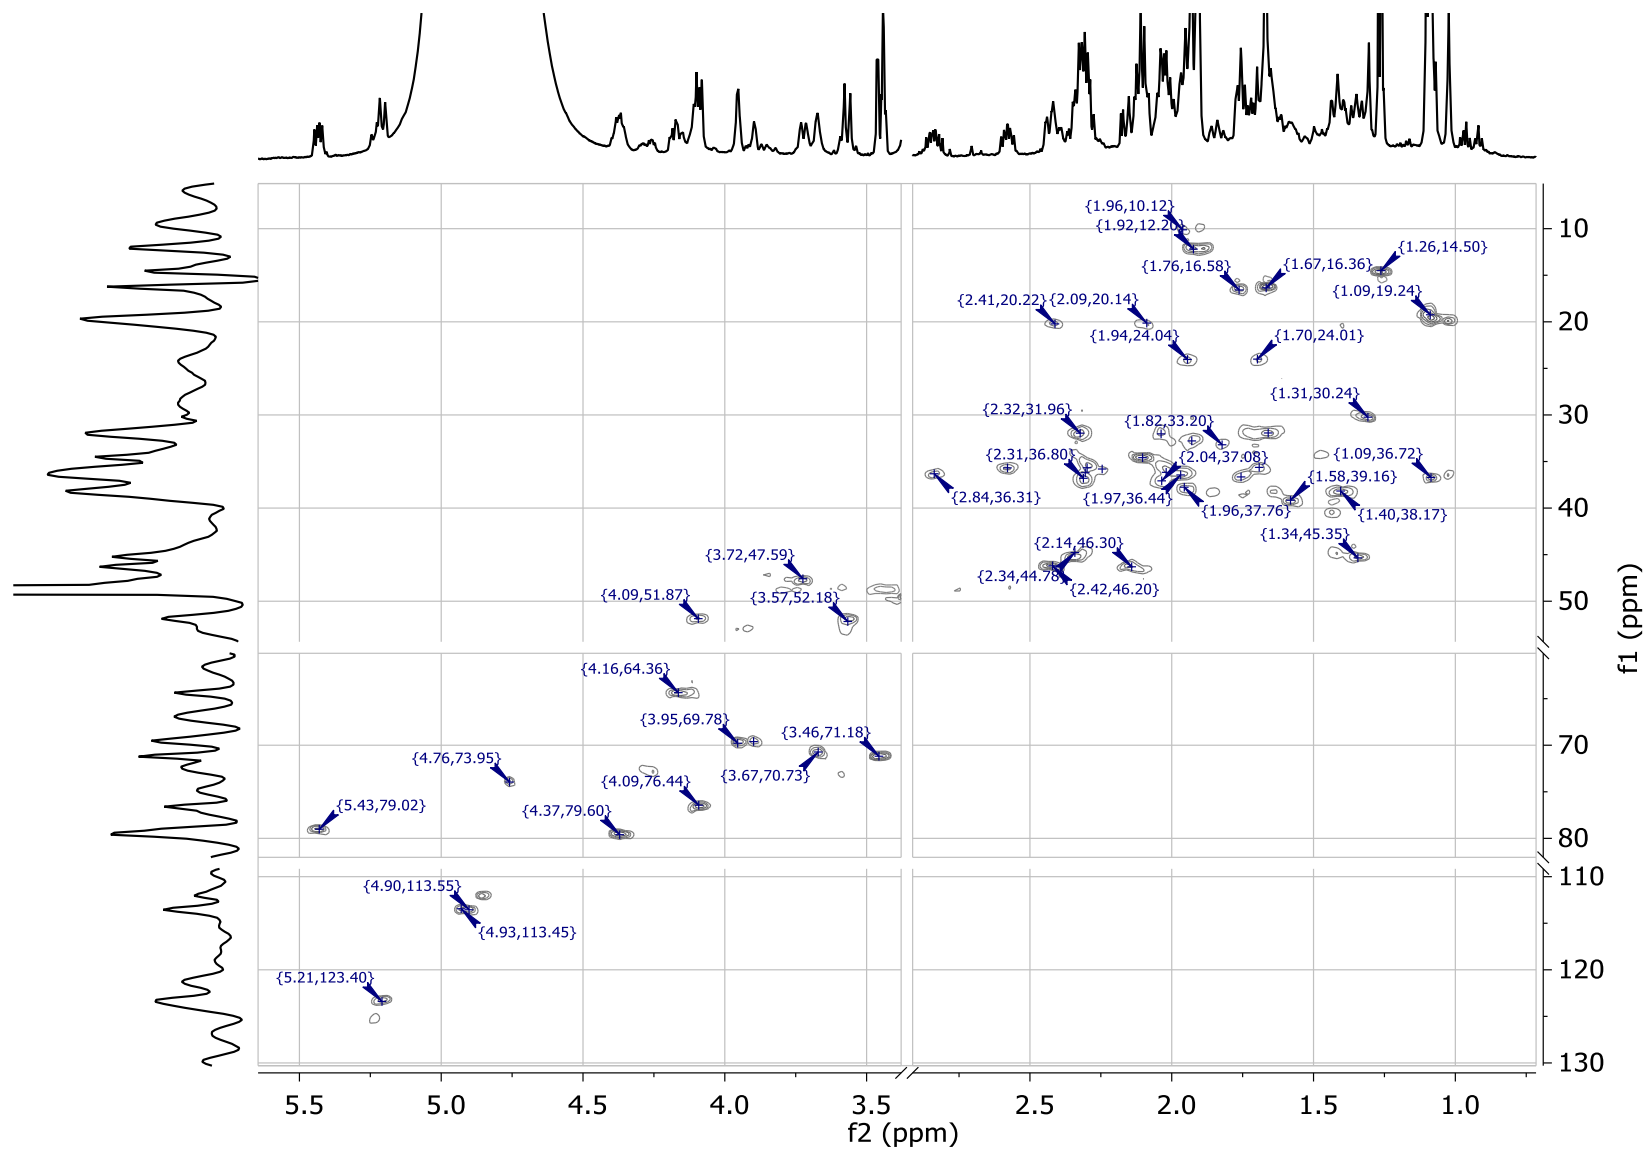

Figure S56: Slice of 2D HSQC spectra of 20-Hydroxy-13,19-didesMethyl-SPX D (600 MHz Proton frequency, CD<sub>3</sub>OD).

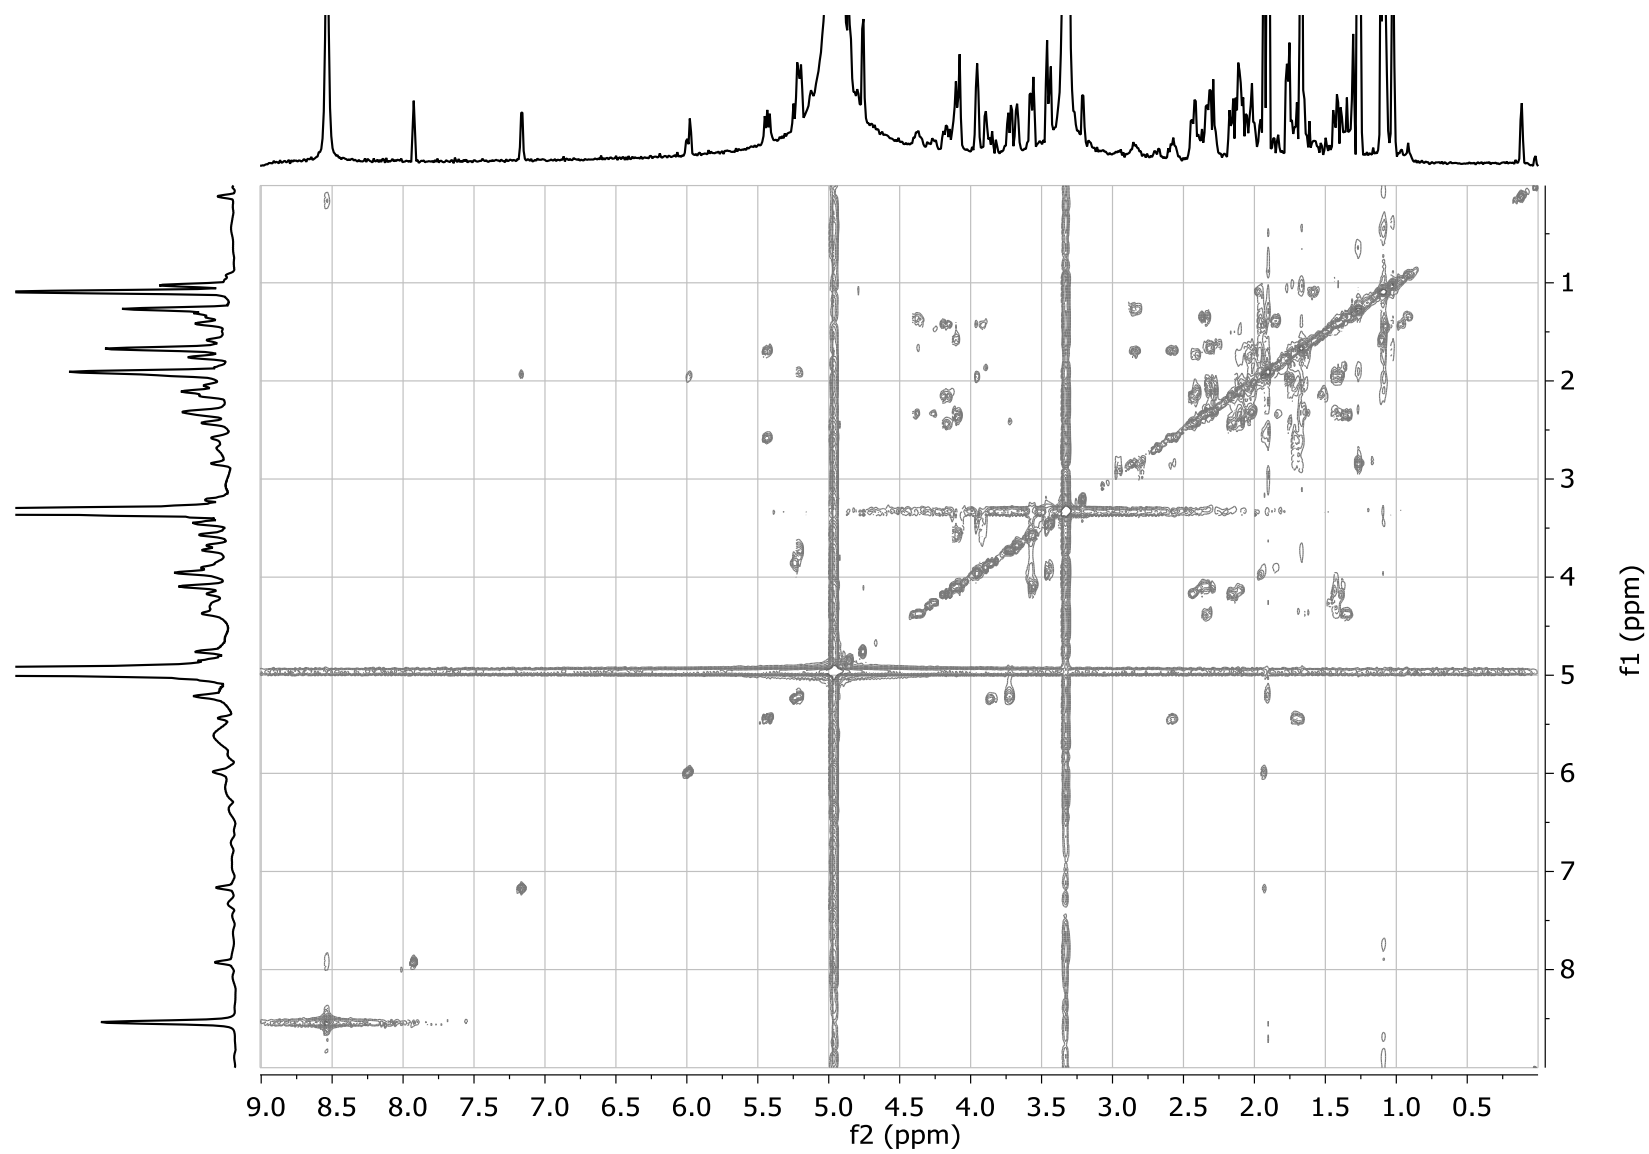

Figure S57: 2D COSY spectra of 20-Hydroxy-13,19-dimethyl-SPX D (600 MHz, CD<sub>3</sub>OD).

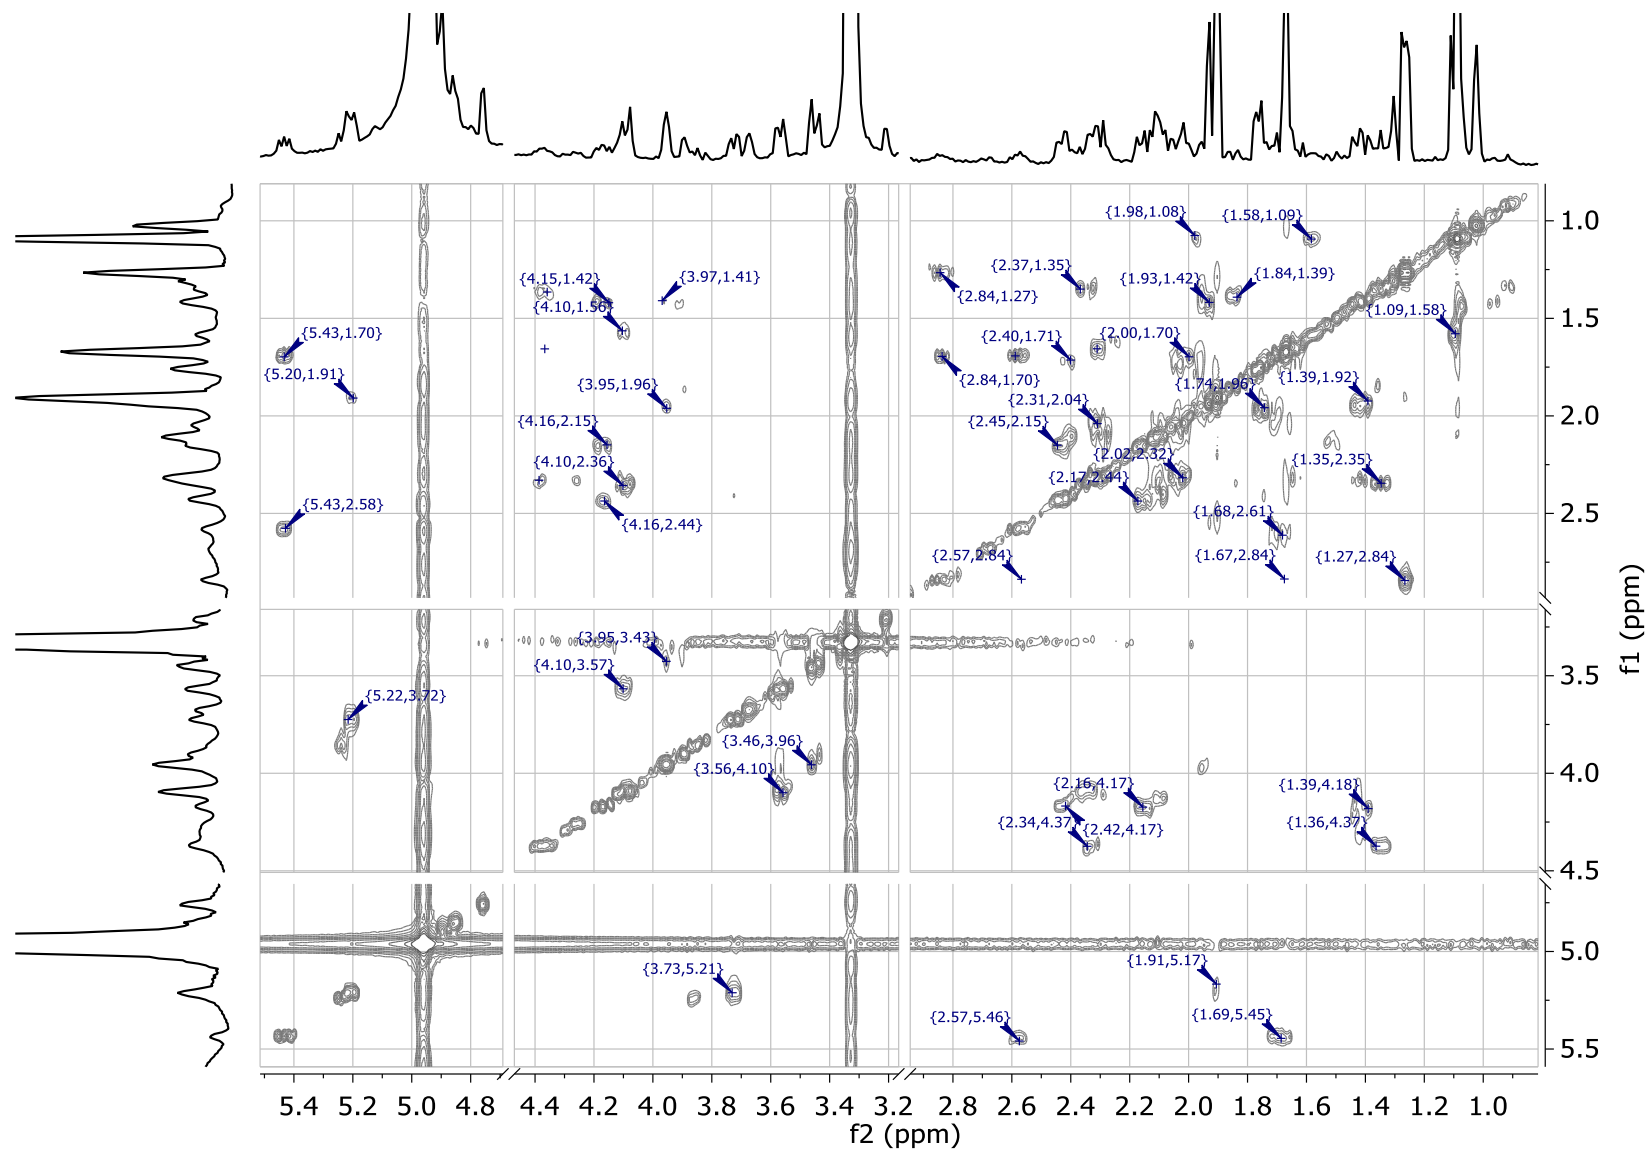

Figure S58: Slice of 2D COSY spectra of 20-Hydroxy-13,19-didesMethyl-SPX D (600 MHz, CD<sub>3</sub>OD).

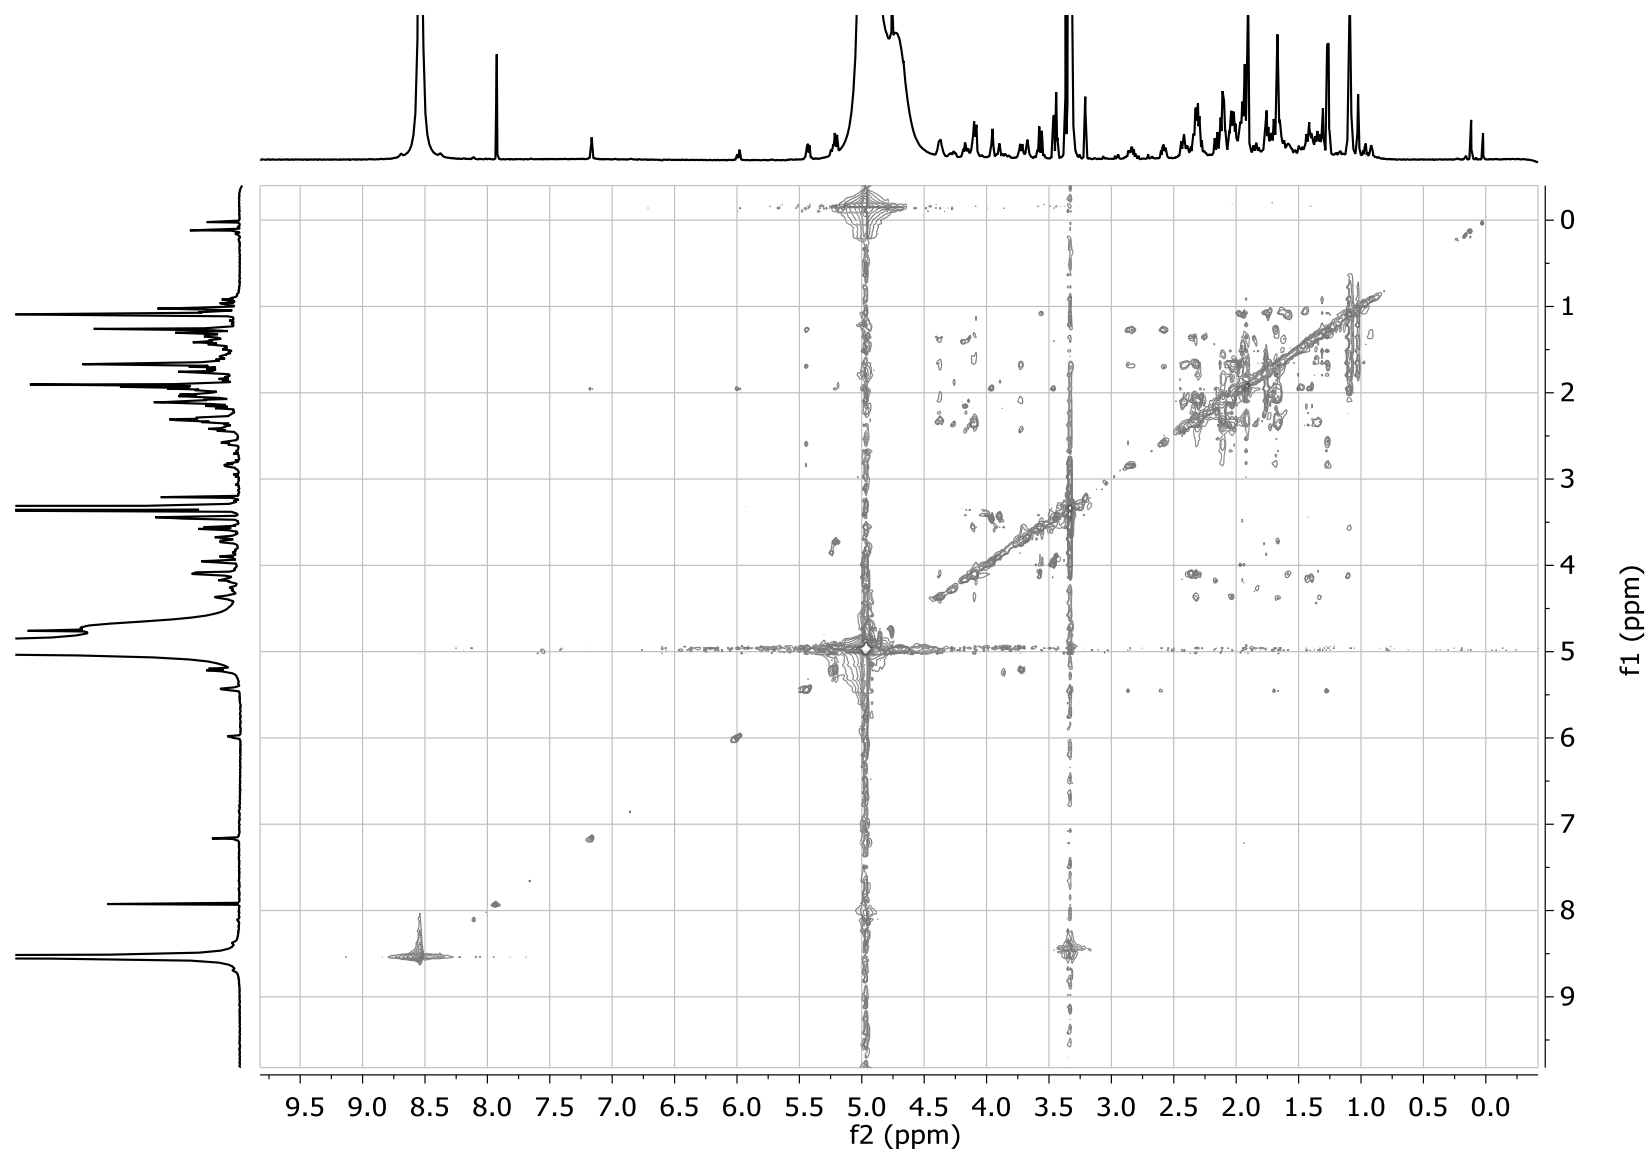

Figure S59: 2D TOCSY spectra of 20-Hydroxy-13,19-dimethyl-SPX D (600 MHz, CD<sub>3</sub>OD).

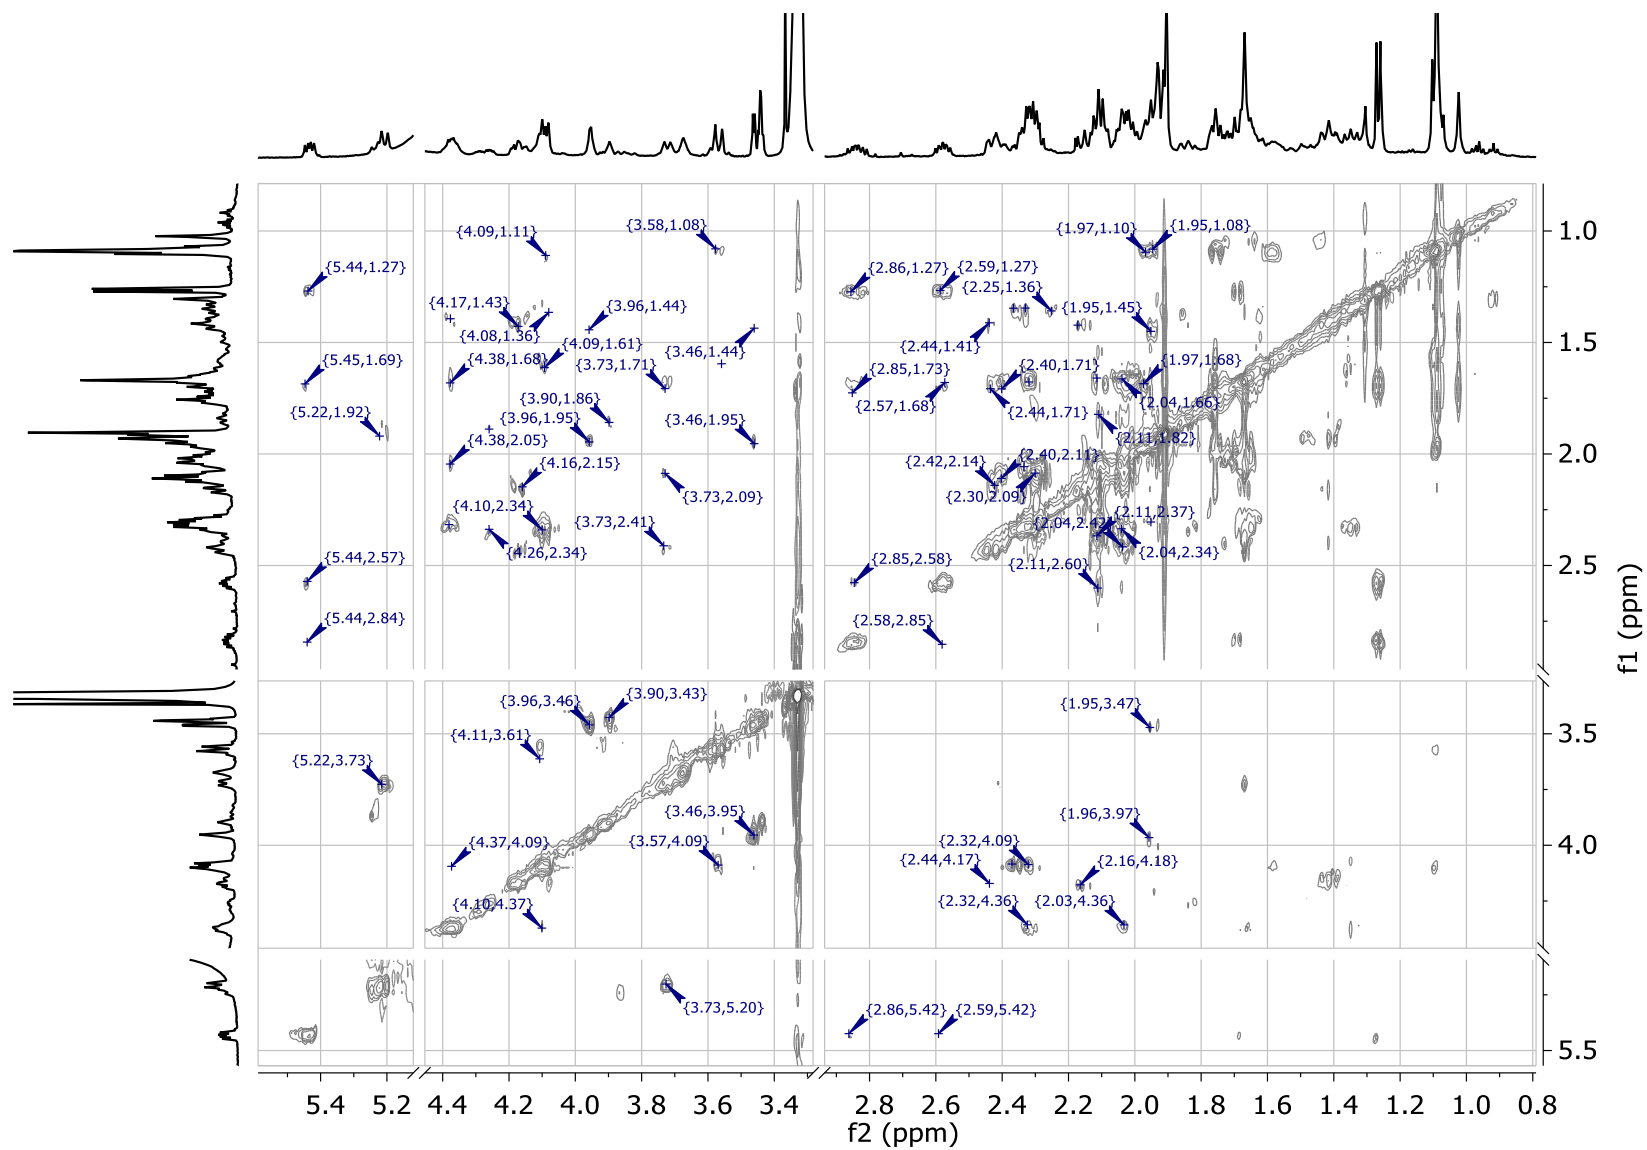

Figure S60: Slice of 2D TOCSY spectra of 20-Hydroxy-13,19-didesMethyl-SPX D (600 MHz, CD<sub>3</sub>OD).

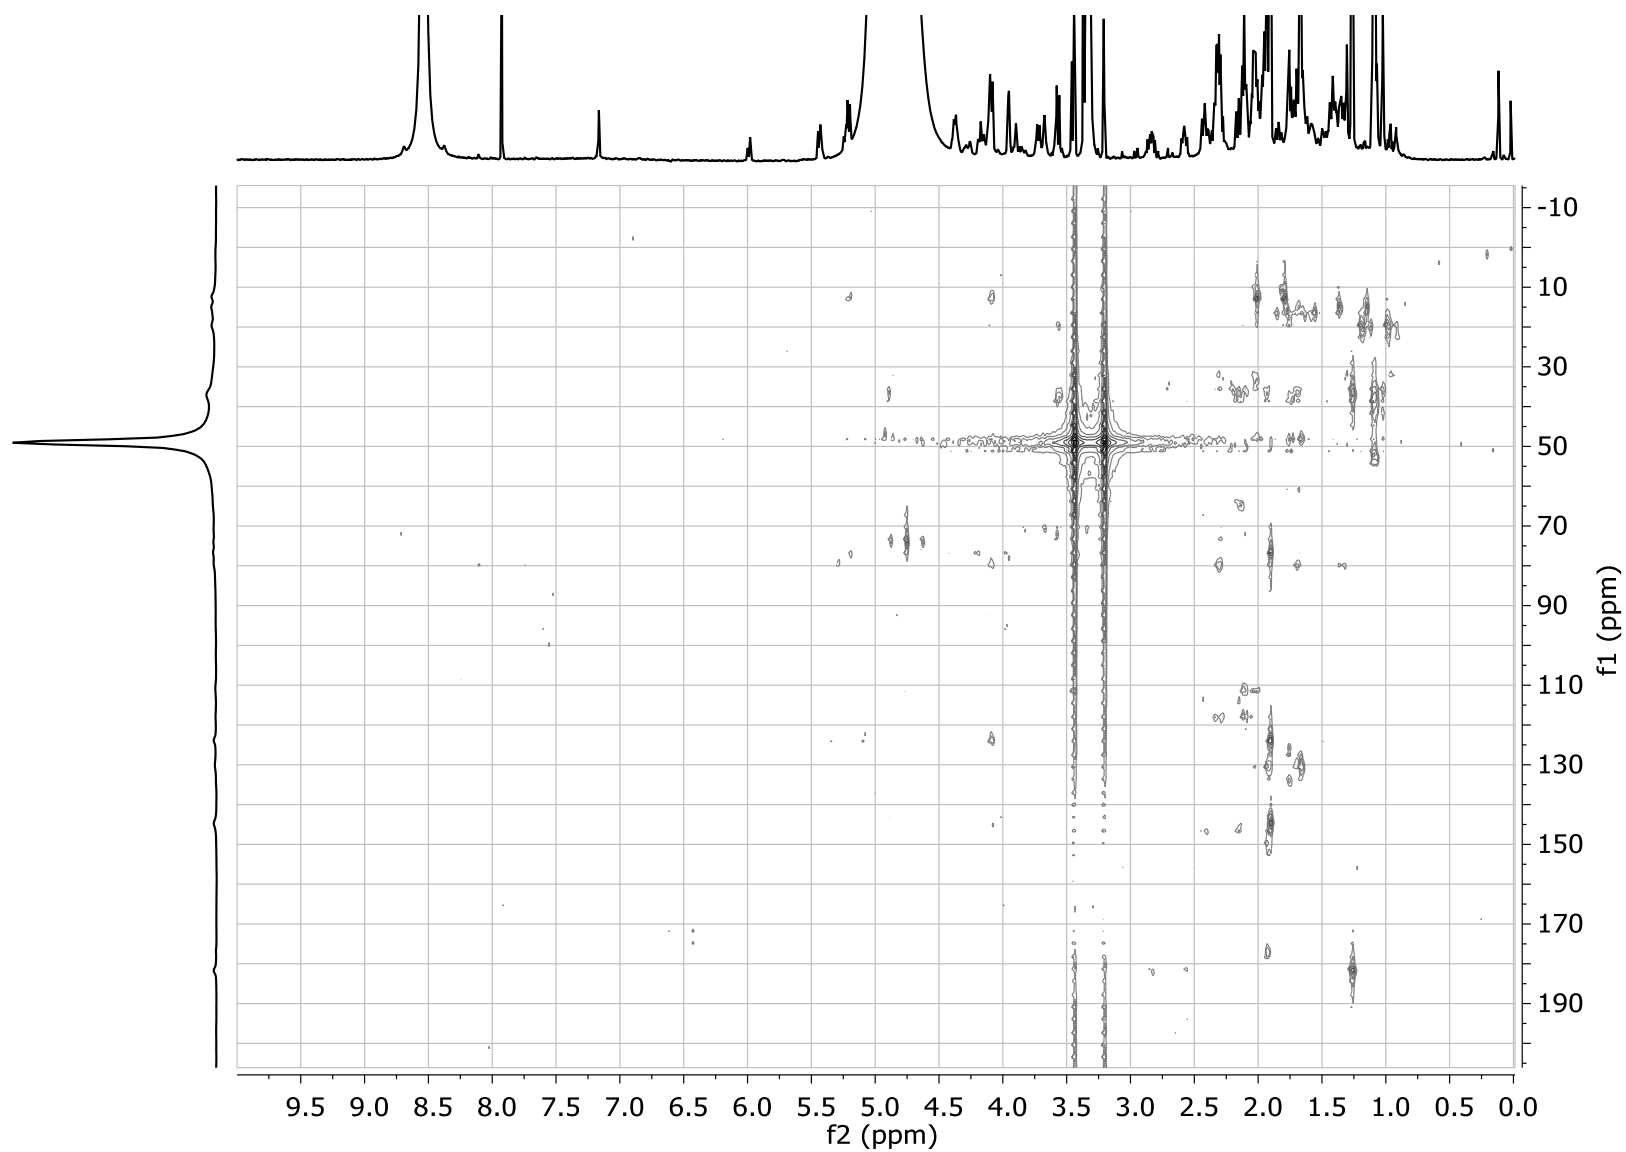

Figure S61: 2D HMBC spectra of 20-Hydroxy-13,19-dimethyl-SPX D (600 MHz Proton frequency, CD<sub>3</sub>OD).

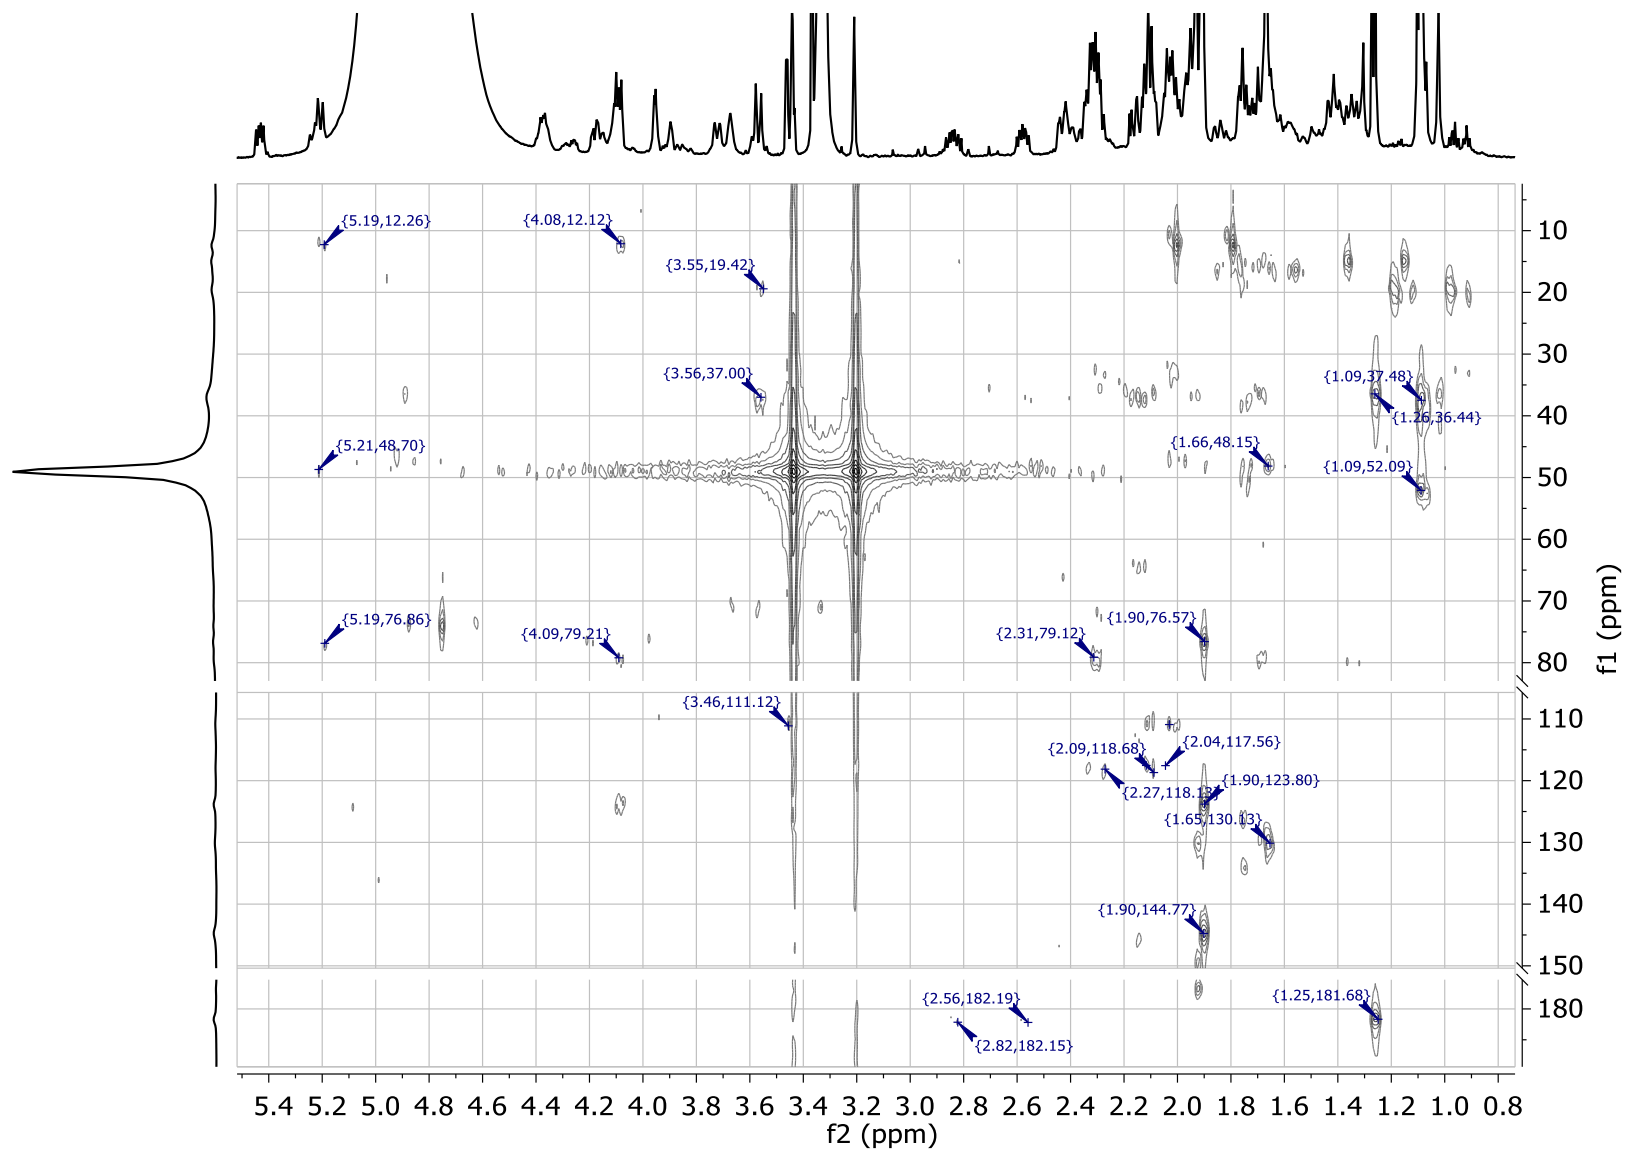

Figure S62: Slice of 2D HMBC spectra of 20-Hydroxy-13,19-didesMethyl-SPX D (600 MHz Proton frequency, CD<sub>3</sub>OD).



**Table S1:** Mass transitions of spiroimines included in LC-MS/MS analysis ( $m/z$ ; precursor ion  $\rightarrow$  fragment ion), retention times and characteristic group fragments. Compounds detected in *A. ostenfeldii* strain OKNL48 originally isolated from Ouwerkerkse Kreek, the Netherlands, and their respective data are underlined.

| Mass Transition<br>( $m/z$ )            | Common Name                                | Reference     | Retention<br>Time (min) | $m/z$                                          |                        |                    |            |
|-----------------------------------------|--------------------------------------------|---------------|-------------------------|------------------------------------------------|------------------------|--------------------|------------|
|                                         |                                            |               |                         | Group 1                                        | Group 2                | Group 3            | Group 4    |
| <b>Spirolides</b>                       |                                            |               |                         |                                                |                        |                    |            |
| 650 $\rightarrow$ 164                   | Spirolide H                                | [18]          |                         | 650/632/614                                    | 402/384                | 206                | 164        |
| 652 $\rightarrow$ 164                   | Spirolide I                                | [18]          |                         | 652/634/616                                    | 402/384                | 206                | 164        |
| 678 $\rightarrow$ 164                   | 13,19-didesMethyl-spirolide C              | [19,20]       |                         | 678/660/642/624                                | 448/430/412/394        |                    | 164        |
| 692 $\rightarrow$ 150                   | Spirolide A                                | [13]          |                         | 692/674/624                                    | 444/390                | 190                | 150        |
| <u>692 <math>\rightarrow</math> 164</u> | <u>13-desMethyl-spirolide C</u>            | <u>[6,13]</u> | <u>12.76</u>            | <u>692/674/656/638</u>                         | <u>462/444/426</u>     |                    | <u>164</u> |
| 692 $\rightarrow$ 164                   | Spirolide G                                | [21]          |                         | 692/674/656/638                                | 378                    |                    | 164        |
| 694 $\rightarrow$ 150                   | Spirolide B                                | [22,23]       |                         | 694/676/658/640                                | 462/444/426            |                    | 150        |
| 694 $\rightarrow$ 164                   | 13-desMethyl spiroilide D                  | [24]          |                         | 694/676/658/640                                | 444/426                | 230/204/177        | 164        |
| <u>694 <math>\rightarrow</math> 164</u> | <u>(10)</u>                                | <u>[6]</u>    | <u>12.33</u>            | <u>694/676/658/640/622</u>                     | <u>446/428/410</u>     | <u>292/274/248</u> | <u>164</u> |
| <u>696 <math>\rightarrow</math> 164</u> | <u>(11)</u>                                | <u>[6]</u>    | <u>12.39</u>            | <u>696/678/660/642/624</u>                     | <u>464/446/428/410</u> | <u>292/274/248</u> | <u>164</u> |
| 706 $\rightarrow$ 164                   | Spirolide C                                | [13]          |                         | 706/688/638                                    | 458/404                | 204                | 164        |
| 706 $\rightarrow$ 164                   | 20-Methyl-spirolide G                      | [25]          |                         | 706/688/670/652                                | 392/374/346            | 258                | 164        |
| 708 $\rightarrow$ 164                   | Spirolide D                                | [22,25]       |                         | 708/690/672/654                                | 458/440                | 230/206/204/177    | 164        |
| <u>708 <math>\rightarrow</math> 180</u> | <u>27-Hydroxy-13-desMethyl-spirolide C</u> | <u>[6]</u>    | <u>13.06</u>            | <u>708/690/672/654/636</u>                     | <u>478/460/442/424</u> |                    | <u>180</u> |
| <u>710 <math>\rightarrow</math> 164</u> | <u>(12)</u>                                | <u>[6]</u>    | <u>12.97</u>            | <u>710/692/674/656/638</u>                     | <u>462/444/426</u>     |                    | <u>164</u> |
| <u>720 <math>\rightarrow</math> 164</u> | <u>(13)</u>                                | <u>[6]</u>    | <u>13.29</u>            | <u>720/702/684/666</u>                         | <u>490/472/454</u>     |                    | <u>164</u> |
| <u>722 <math>\rightarrow</math> 164</u> | <u>(14)</u>                                | <u>[6]</u>    | <u>13.40</u>            | <u>722/704/686/668</u>                         | <u>490/472/454</u>     |                    | <u>164</u> |
| <b>Gymnodimines</b>                     |                                            |               |                         |                                                |                        |                    |            |
| <u>508 <math>\rightarrow</math> 490</u> | <u>Gymnodimine A</u>                       | <u>[6,12]</u> | <u>11.81</u>            | <u>508/490/392/286/246/202/174/162/136/121</u> |                        |                    |            |
| <u>510 <math>\rightarrow</math> 492</u> | <u>(1)</u>                                 | <u>[6]</u>    | <u>12.21</u>            | <u>510/492/482/332/302/136/120</u>             |                        |                    |            |
| <u>522 <math>\rightarrow</math> 504</u> | <u>12-Methyl-gymnodimine A</u>             | <u>[5,6]</u>  | <u>12.17</u>            | <u>522/504/406/300/246/202/174/162/136/120</u> |                        |                    |            |
| <u>526 <math>\rightarrow</math> 508</u> | <u>(2)</u>                                 | <u>[6]</u>    | <u>11.32</u>            | <u>526/508/348/262/174/162/136/120</u>         |                        |                    |            |

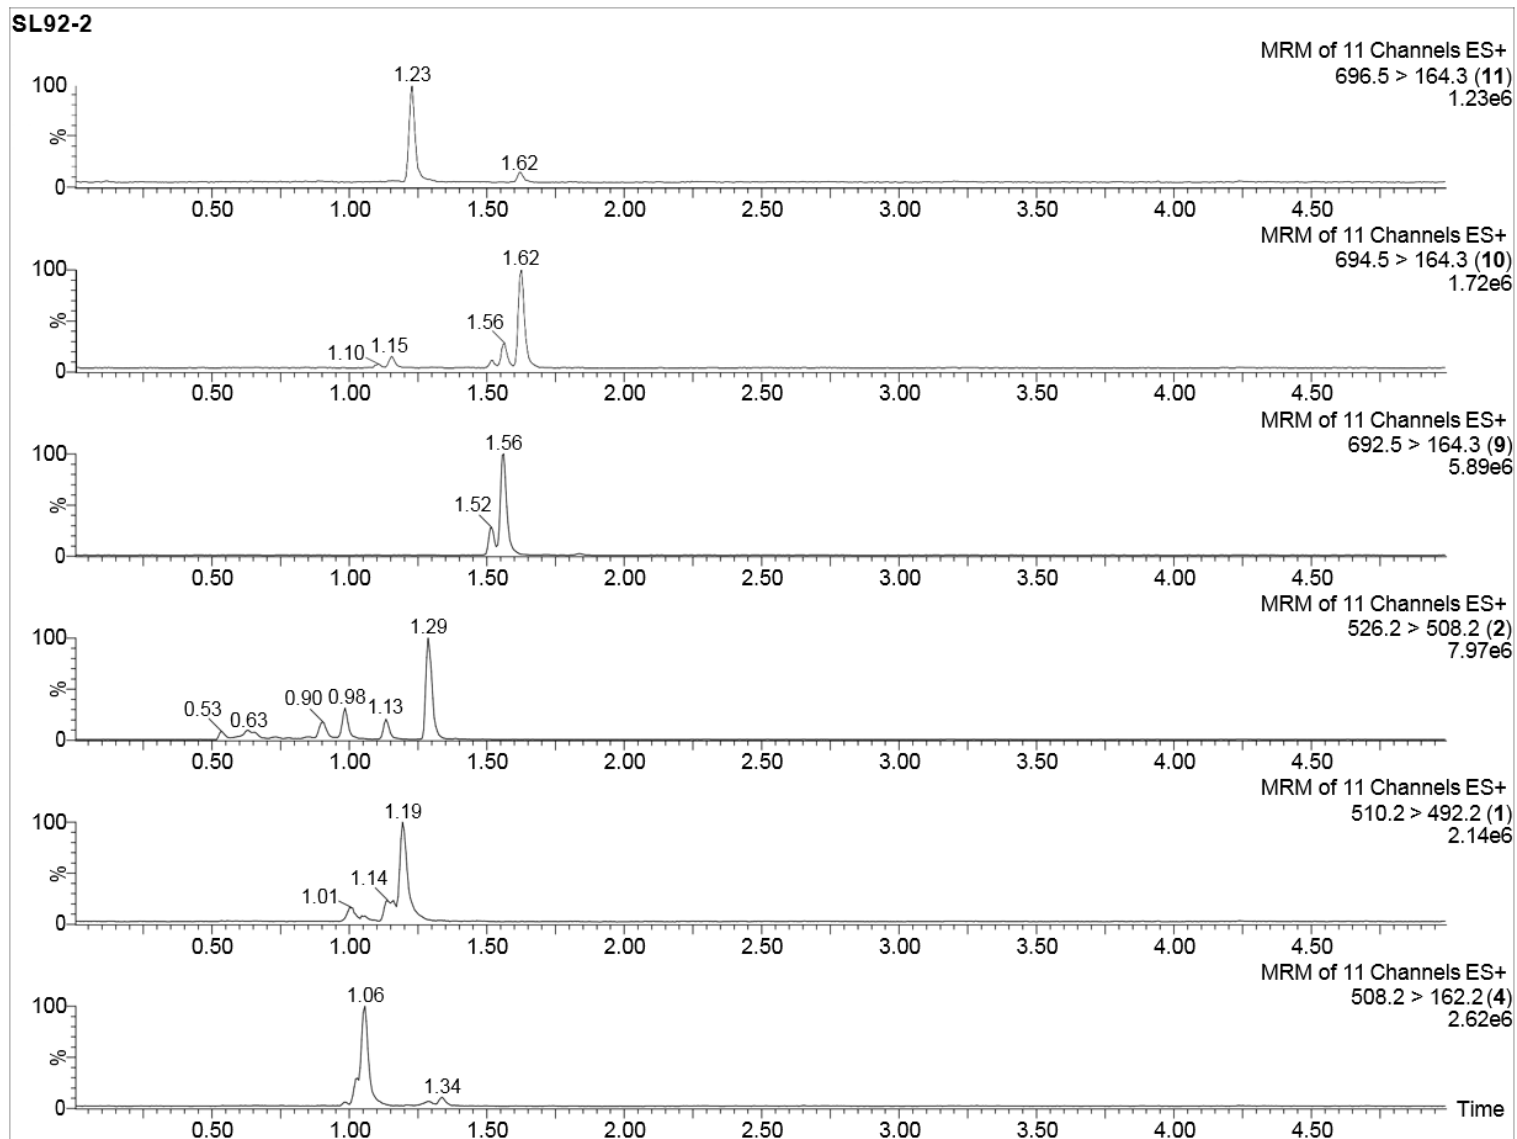

Figure S63: LC-MS/MS chromatogram of station SL92-2.
